# Supplementary material for: Assigning the Absolute Configurations of Chiral Primary Amines Based on Experimental and DFT-Calculated 19F Nuclear Magnetic Resonance
Source: Front Chem. 2019 May 20;7:318. doi: 10.3389/fchem.2019.00318 (PMC6536038; doi:10.3389/fchem.2019.00318)
Supplement: Supplementary file 1 [file Table_1.docx]

Supplementary Information

**Assigning the Absolute Configurations of Chiral Primary Amines Based on Experimental and DFT Calculated 19F NMR**

Shiwei Yang1,2, Guangling Bian1,2*, Rongjian Sa3*, Ling Song1,2*

1University of Chinese Academy of Sciences, Beijing, P. R. China.

2The Key Laboratory of Coal to Ethylene Glycol and Its Related Technology, Fujian Institute of Research on the Structure of Matter, Chinese Academy of Sciences, Fuzhou, P. R. China.

3Institute of Oceanography, Ocean college, Fujian Provincial Key Laboratory of Information Processing and Intelligent Control, Minjiang University, Fuzhou, P. R. China.

*** Correspondence:**Dr. Bian Guangling, [glb@fjirsm.ac.cn](mailto:glb@fjirsm.ac.cn);

Dr. Sa Rongjian, [rjsa@mju.edu.cn](mailto:rjsa@mju.edu.cn);

Dr. Song Ling, [songling@fjirsm.ac.cn](mailto:songling@fjirsm.ac.cn).

**Table of Contents**

[1. Effects of reaction time and reagent ratio on the derivatization process. 4](#_Toc6653870)

[Figure S1. 1H NMR of (*S*)-FPP (400 MHz, TMS) 4](#_Toc6653871)

[Figure S2. 13C NMR of (*S*)-FPP (100 MHz, CDCl3) 5](#_Toc6653872)

[Figure S3. 19 F-{1H} NMR of (*S*)-FPP (376 MHz, Trifluorotoluene) 5](#_Toc6653873)

[Figure S4. HRMS of (*S*)-FPP 6](#_Toc6653874)

[Figure S5. 19F-{1H} NMR of (*R*)-FPA-amide 1 6](#_Toc6653875)

[Figure S6. 19F-{1H} NMR of (*S*)-FPA-amide 1 7](#_Toc6653876)

[Figure S7. 19F-{1H} NMR of (*R*)-FPA-amide 2 7](#_Toc6653877)

[Figure S8. 19F-{1H} NMR of (*S*)-FPA-amide 2 8](#_Toc6653878)

[Figure S9. 19F-{1H} NMR of (*R*)-FPA-amide 3 8](#_Toc6653879)

[Figure S10. 19F-{1H} NMR of (*S*)-FPA-amide 3 9](#_Toc6653880)

[Figure S11. 19F-{1H} NMR of (*R*)-FPA-amide 4 9](#_Toc6653881)

[Figure S12. 19F-{1H} NMR of (*S*)-FPA-amide 4 10](#_Toc6653882)

[Figure S13. 19F-{1H} NMR of (*R*)-FPA-amide 5 10](#_Toc6653883)

[Figure S14. 19F-{1H} NMR of (*S*)-FPA-amide 5 11](#_Toc6653884)

[Figure S15. 19F-{1H} NMR of (*R*)-FPA-amide 6 11](#_Toc6653885)

[Figure S16. 19F-{1H} NMR of (*S*)-FPA-amide 6 12](#_Toc6653886)

[Figure S17. 19F-{1H} NMR of (*R*)-FPA-amide 7 12](#_Toc6653887)

[Figure S18. 19F-{1H} NMR of (*S*)-FPA-amide 7 13](#_Toc6653888)

[Figure S19. 19F-{1H} NMR of (*R*)-FPA-amide 8 13](#_Toc6653889)

[Figure S20. 19F-{1H} NMR of (*S*)-FPA-amide 8 14](#_Toc6653890)

[Figure S21. 19F-{1H} NMR of (*R*)-FPA-amide 9 14](#_Toc6653891)

[Figure S22. 19F-{1H} NMR of (*S*)-FPA-amide 9 15](#_Toc6653892)

[Figure S23. 19F-{1H} NMR of (*R*)-FPA-amide 10 15](#_Toc6653893)

[Figure S24. 19F-{1H} NMR of (*S*)-FPA-amide 10 16](#_Toc6653894)

[Figure S25. 19F-{1H} NMR of (*R*)-FPA-amide 11 16](#_Toc6653895)

[Figure S26. 19F-{1H} NMR of (*S*)-FPA-amide 11 17](#_Toc6653896)

[Figure S27. 19F-{1H} NMR of (*R*)-FPA-amide 12 17](#_Toc6653897)

[Figure S28. 19F-{1H} NMR of (*S*)-FPA-amide 12 18](#_Toc6653898)

[Figure S29. 19F-{1H} NMR of (*R*)-FPA-amide 13 18](#_Toc6653899)

[Figure S30. 19F-{1H} NMR of (*S*)-FPA-amide 13 19](#_Toc6653900)

[Figure S31. 19F-{1H} NMR of (*R*)-FPA-amide 14 19](#_Toc6653901)

[Figure S32. 19F-{1H} NMR of (*S*)-FPA-amide 14 20](#_Toc6653902)

[Figure S33. 19F-{1H} NMR of (*R*)-FPA-amide 15 20](#_Toc6653903)

[Figure S34. 19F-{1H} NMR of (*S*)-FPA-amide 15 21](#_Toc6653904)

[Figure S35. 19F-{1H} NMR of (*R*)-FPA-amide 16 21](#_Toc6653905)

[Figure S36. 19F-{1H} NMR of (*S*)-FPA-amide 16 22](#_Toc6653906)

[Figure S37. 19F-{1H} NMR of (*R*)-FPA-amide 17 22](#_Toc6653907)

[Figure S38. 19F-{1H} NMR of (*S*)-FPA-amide 17 23](#_Toc6653908)

[Figure S39. 19F-{1H} NMR of (*R*)-FPA-amide 18 23](#_Toc6653909)

[Figure S40. 19F-{1H} NMR of (*S*)-FPA-amide 18 24](#_Toc6653910)

[Figure S41. 19F-{1H} NMR of (*R*)-FPA-amide 19 24](#_Toc6653911)

[Figure S42. 19F-{1H} NMR of (*S*)-FPA-amide 19 25](#_Toc6653912)

[Figure S43. 19F-{1H} NMR of (*R*)-FPA-amide 20 25](#_Toc6653913)

[Figure S44. 19F-{1H} NMR of (*S*)-FPA-amide 20 26](#_Toc6653914)

[Figure S45. 19F-{1H} NMR of (*R*)-FPA-amide 21 26](#_Toc6653915)

[Figure S46. 19F-{1H} NMR of (*S*)-FPA-amide 21 27](#_Toc6653916)

[Figure S47. 19F-{1H} NMR of (*R*)-FPA-amide 22 27](#_Toc6653917)

[Figure S48. 19F-{1H} NMR of (*S*)-FPA-amide 22 28](#_Toc6653918)

[Figure S49. 19F-{1H} NMR of (*R*)-FPA-amide 23 28](#_Toc6653919)

[Figure S50. 19F-{1H} NMR of (*S*)-FPA-amide 23 29](#_Toc6653920)

[2. Computational models of complexes. 29](#_Toc6653921)

[3. 19F NMR calculation for all conformers according to Boltzmann equations based on free energies data by frequency calculation. 83](#_Toc6653922)

1. Effects of reaction time and reagent ratio on the derivatization process.

**A**: (*S*)-FPP

**B**: Amine **1** + 1.0 eqviv. (*S*)-FPP, 20 mins

**C**: Amine **1** + 0.5 eqviv. (*S*)-FPP, 20 mins

**D**: Amine **1** + 0.2 eqviv. (*S*)-FPP, 20 mins

**E**: Amine **1** + 0.2 eqviv. (*S*)-FPP, 5 mins

**F**: Amine **1** + 0.2 eqviv. (*S*)-FPP, 12 hours

# Figure S1. 1H NMR of (*S*)-FPP (400 MHz, TMS)

# Figure S2. 13C NMR of (*S*)-FPP (100 MHz, CDCl3)

# Figure S3. 19 F-{1H} NMR of (*S*)-FPP (376 MHz, Trifluorotoluene)

# Figure S4. HRMS of (*S*)-FPP


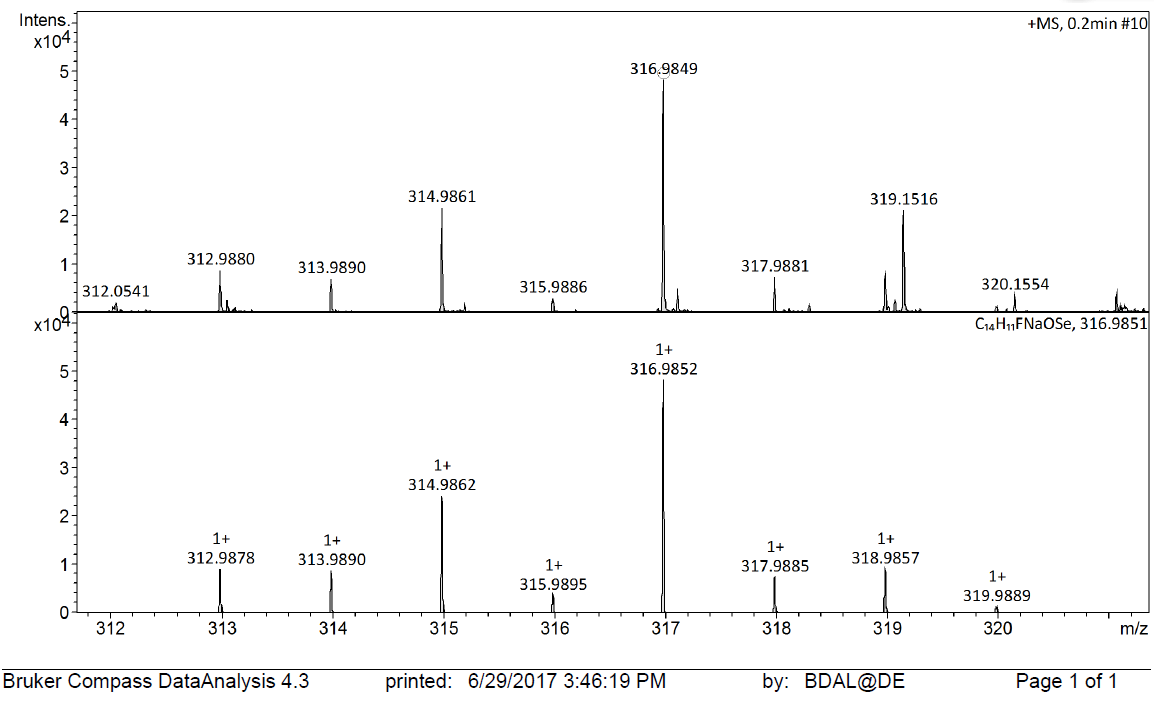


HRMS (ESI) Calcd For [C14H11FNaOSe, M+Na] +: 316.9851, found: 316.9849.

# Figure S5. 19F-{1H} NMR of (*R*)-FPA-amide 1

# Figure S6. 19F-{1H} NMR of (*S*)-FPA-amide 1

# Figure S7. 19F-{1H} NMR of (*R*)-FPA-amide 2

# Figure S8. 19F-{1H} NMR of (*S*)-FPA-amide 2

# Figure S9. 19F-{1H} NMR of (*R*)-FPA-amide 3

# Figure S10. 19F-{1H} NMR of (*S*)-FPA-amide 3

# Figure S11. 19F-{1H} NMR of (*R*)-FPA-amide 4

# Figure S12. 19F-{1H} NMR of (*S*)-FPA-amide 4

# Figure S13. 19F-{1H} NMR of (*R*)-FPA-amide 5

# Figure S14. 19F-{1H} NMR of (*S*)-FPA-amide 5

# Figure S15. 19F-{1H} NMR of (*R*)-FPA-amide 6

# Figure S16. 19F-{1H} NMR of (*S*)-FPA-amide 6

# Figure S17. 19F-{1H} NMR of (*R*)-FPA-amide 7

# Figure S18. 19F-{1H} NMR of (*S*)-FPA-amide 7

# Figure S19. 19F-{1H} NMR of (*R*)-FPA-amide 8

# Figure S20. 19F-{1H} NMR of (*S*)-FPA-amide 8

# Figure S21. 19F-{1H} NMR of (*R*)-FPA-amide 9

# Figure S22. 19F-{1H} NMR of (*S*)-FPA-amide 9

# Figure S23. 19F-{1H} NMR of (*R*)-FPA-amide 10

# Figure S24. 19F-{1H} NMR of (*S*)-FPA-amide 10

# Figure S25. 19F-{1H} NMR of (*R*)-FPA-amide 11

# Figure S26. 19F-{1H} NMR of (*S*)-FPA-amide 11

# Figure S27. 19F-{1H} NMR of (*R*)-FPA-amide 12

# Figure S28. 19F-{1H} NMR of (*S*)-FPA-amide 12

# Figure S29. 19F-{1H} NMR of (*R*)-FPA-amide 13

# Figure S30. 19F-{1H} NMR of (*S*)-FPA-amide 13

# Figure S31. 19F-{1H} NMR of (*R*)-FPA-amide 14

# Figure S32. 19F-{1H} NMR of (*S*)-FPA-amide 14

# Figure S33. 19F-{1H} NMR of (*R*)-FPA-amide 15

# Figure S34. 19F-{1H} NMR of (*S*)-FPA-amide 15

# Figure S35. 19F-{1H} NMR of (*R*)-FPA-amide 16

# Figure S36. 19F-{1H} NMR of (*S*)-FPA-amide 16

# Figure S37. 19F-{1H} NMR of (*R*)-FPA-amide 17

# Figure S38. 19F-{1H} NMR of (*S*)-FPA-amide 17

# Figure S39. 19F-{1H} NMR of (*R*)-FPA-amide 18

# Figure S40. 19F-{1H} NMR of (*S*)-FPA-amide 18

# Figure S41. 19F-{1H} NMR of (*R*)-FPA-amide 19

# Figure S42. 19F-{1H} NMR of (*S*)-FPA-amide 19

# Figure S43. 19F-{1H} NMR of (*R*)-FPA-amide 20

# Figure S44. 19F-{1H} NMR of (*S*)-FPA-amide 20

# Figure S45. 19F-{1H} NMR of (*R*)-FPA-amide 21

# Figure S46. 19F-{1H} NMR of (*S*)-FPA-amide 21

# Figure S47. 19F-{1H} NMR of (*R*)-FPA-amide 22

# Figure S48. 19F-{1H} NMR of (*S*)-FPA-amide 22

# Figure S49. 19F-{1H} NMR of (*R*)-FPA-amide 23

# Figure S50. 19F-{1H} NMR of (*S*)-FPA-amide 23

# 2. Computational models of complexes.

**Kelly spheres, F atoms; Blue spheres, N atoms; red spheres, O atoms; gray spheres, C atoms; and white spheres, H atoms.**

**Ball-cylinder model for (*R*)-FPA-amide 1 and cartesian coordinates (Gaussian 09).**


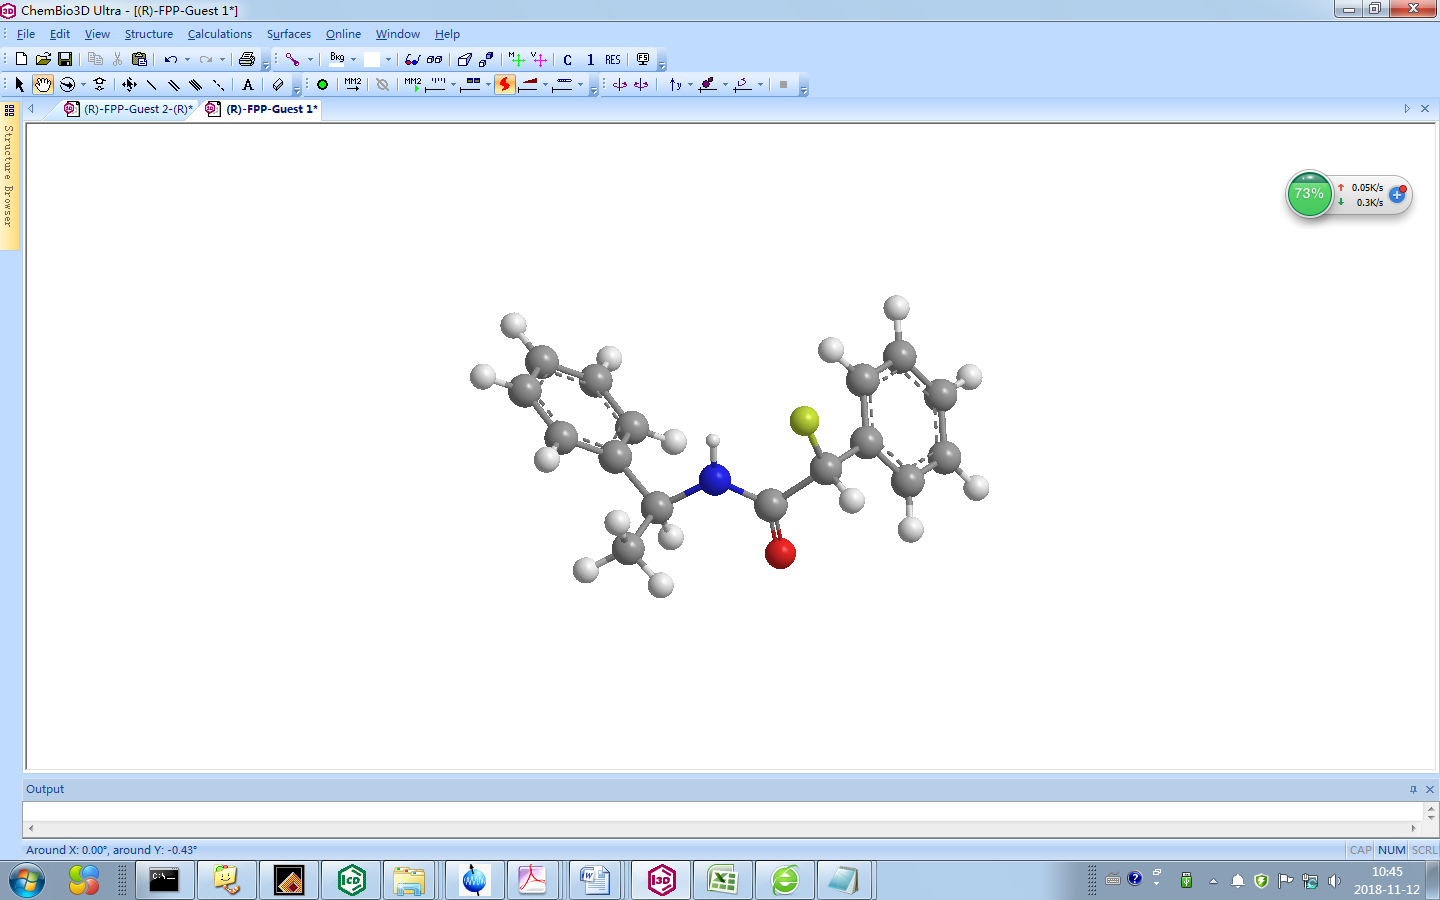
 δα-F*R* (calcd.) = -192.32 ppm

C 2.259980 1.015190 4.069010

C 3.585760 1.047510 3.641970

C 3.955460 0.364660 2.483510

C 3.005310 -0.348710 1.757540

C 1.674230 -0.378510 2.182950

C 1.304540 0.307450 3.341530

C 0.643070 -1.132680 1.373530

C 0.214040 -0.348540 0.118430

F -0.482580 -1.414440 2.170450

N -1.059380 0.090710 0.120910

O 1.025860 -0.161600 -0.778450

C -1.645020 0.861240 -0.987910

C -2.351620 -0.066810 -1.980990

C -2.502760 1.984590 -0.414380

C -1.865890 3.054660 0.228890

C -2.601500 4.098520 0.779710

C -3.994910 4.091330 0.697460

C -4.638830 3.034420 0.061410

C -3.897510 1.987900 -0.490920

H 1.965800 1.540740 4.970500

H 4.327540 1.597710 4.209590

H 4.985830 0.382040 2.147030

H 3.292920 -0.876080 0.856040

H 0.276180 0.277140 3.677910

H 1.038160 -2.092300 1.033380

H -1.646480 -0.162710 0.902440

H -0.791400 1.313640 -1.497750

H -2.766810 0.502340 -2.816120

H -1.632050 -0.783950 -2.379820

H -3.160210 -0.627220 -1.505180

H -0.782840 3.066300 0.295040

H -2.089590 4.920000 1.268380

H -4.570830 4.905120 1.123320

H -5.720720 3.020320 -0.009690

H -4.419370 1.178580 -0.986440

**Ball-cylinder model for (*S*)-FPA-amide 1 and cartesian coordinates (Gaussian 09).**


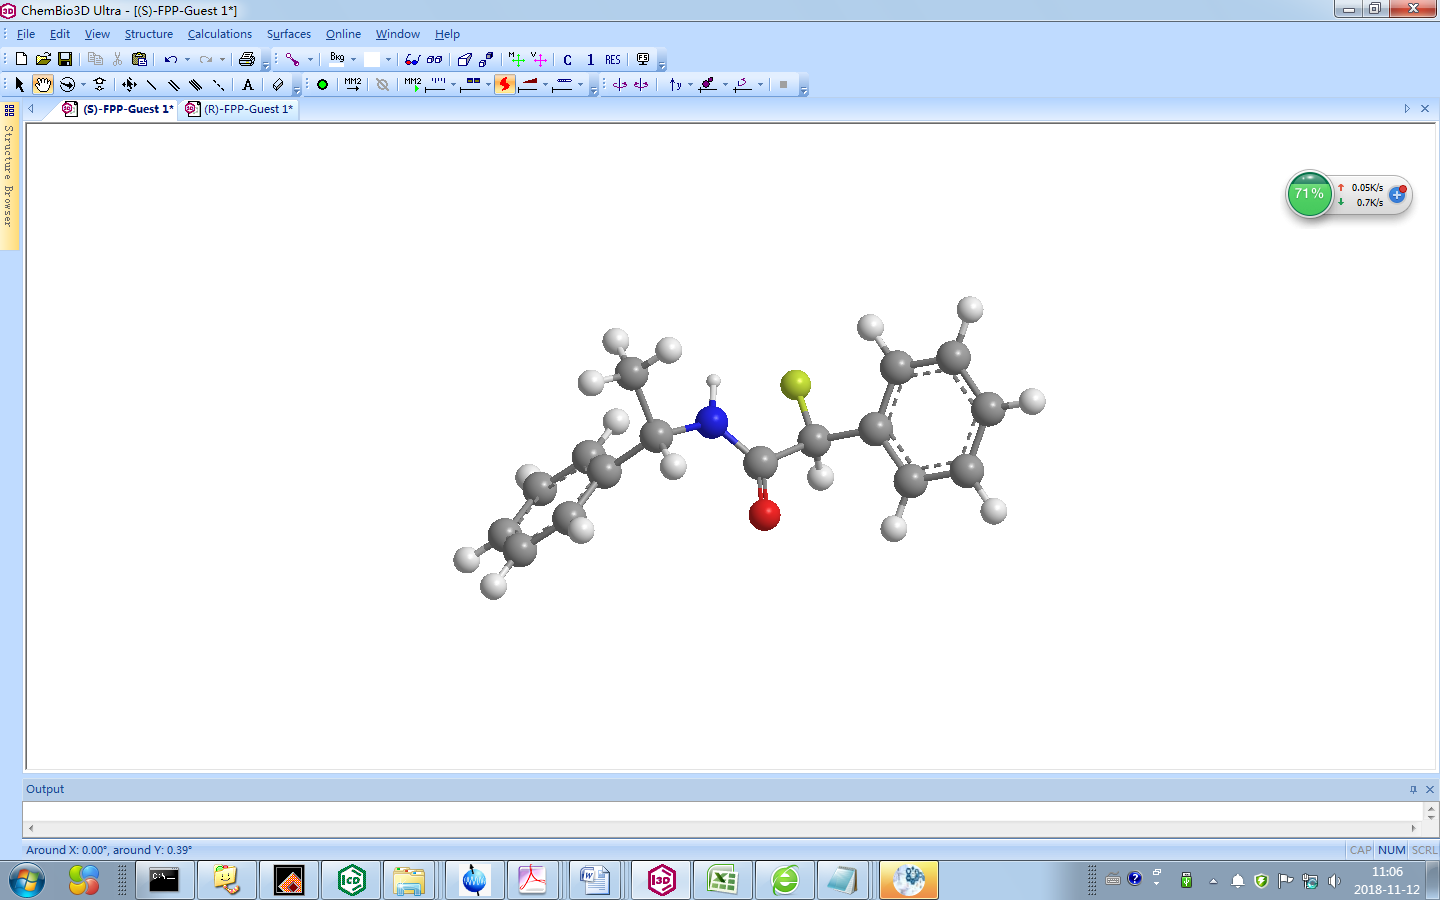
 δα-F*S* (calcd.) = -193.24 ppm

C 4.608406 1.015414 1.823902

C 5.431356 0.036844 1.266572

C 4.875236 -1.160446 0.822422

C 3.502736 -1.380976 0.930422

C 2.678586 -0.402606 1.489132

C 3.238236 0.797424 1.938442

C 1.185766 -0.621716 1.602772

C 0.393596 0.223044 0.586752

F 0.883466 -1.985796 1.427842

N -0.253374 -0.478516 -0.365738

O 0.394946 1.441554 0.685322

C -1.059064 0.157424 -1.409768

C -0.970094 -0.679736 -2.692728

C -2.506144 0.385054 -0.982828

C -3.171474 1.545164 -1.388498

C -4.509034 1.753494 -1.056818

C -5.199954 0.801434 -0.309458

C -4.543474 -0.356936 0.103842

C -3.206744 -0.562806 -0.231458

H 5.033926 1.948654 2.174992

H 6.498846 0.206134 1.183012

H 5.508316 -1.927746 0.391262

H 3.073916 -2.315476 0.592482

H 2.598936 1.560474 2.365022

H 0.825916 -0.345326 2.596322

H -0.190414 -1.485276 -0.332558

H -0.606704 1.135234 -1.585728

H -1.542134 -0.205566 -3.491958

H 0.069116 -0.777166 -3.015708

H -1.384064 -1.680036 -2.533368

H -2.636134 2.295444 -1.961868

H -5.007614 2.662454 -1.374638

H -6.238934 0.963444 -0.045698

H -5.071414 -1.100346 0.690822

H -2.704534 -1.462216 0.107472

**Ball-cylinder model for (*R*)-FPA-amide 2 and cartesian coordinates (Gaussian 09).**

**
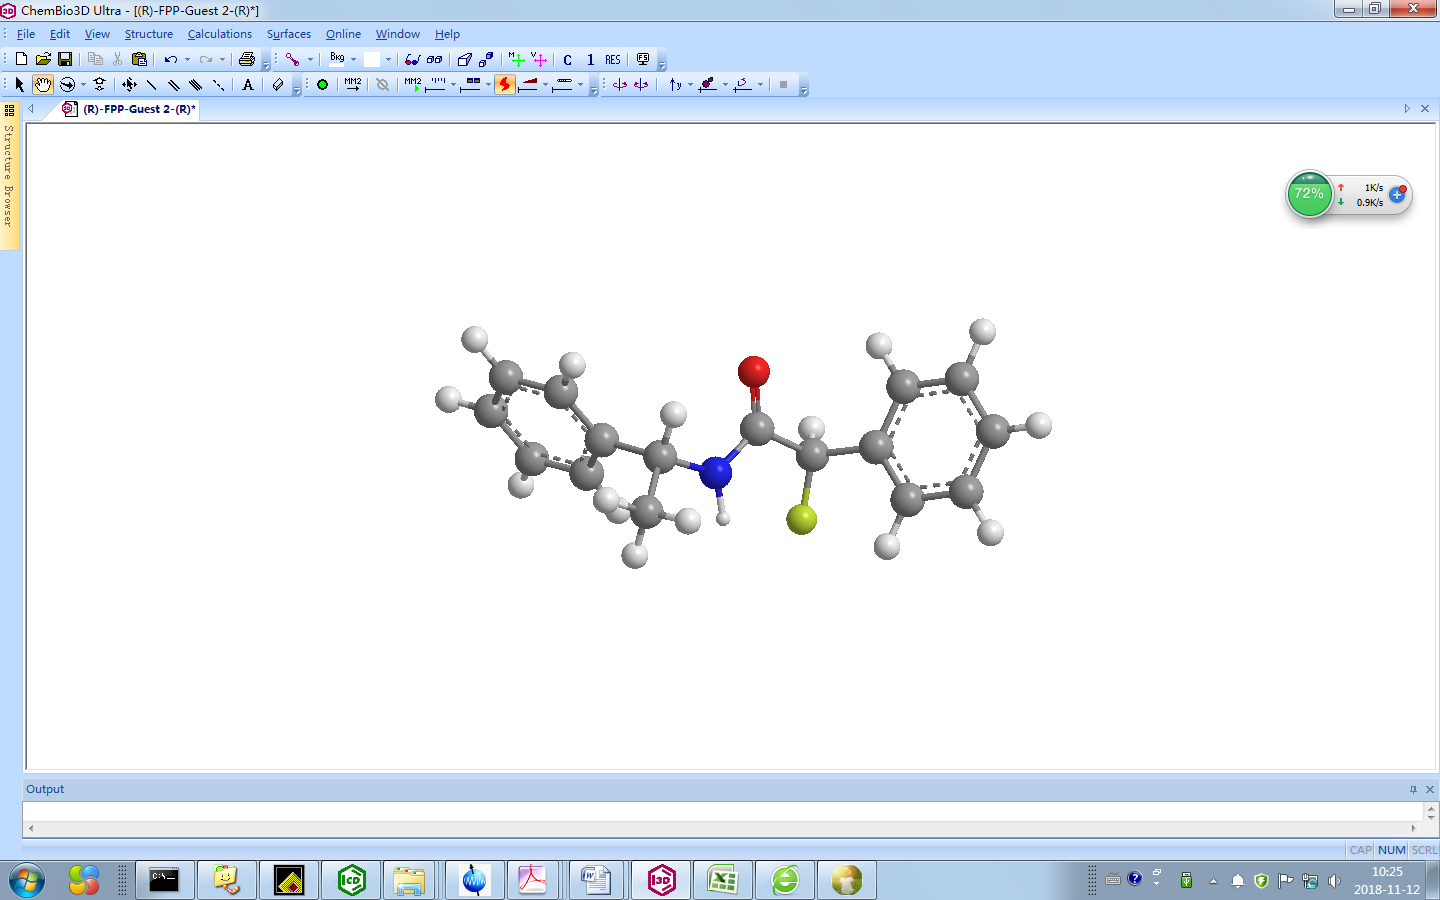
** δα-F*R* (calcd.) = -193.24 ppm

C 3.49186 0.71693 -2.58614

C 4.31481 -0.26164 -2.02881

C 3.75869 -1.45893 -1.58466

C 2.38619 -1.67946 -1.69266

C 1.56204 -0.70109 -2.25137

C 2.12169 0.49894 -2.70068

C 0.06922 -0.9202 -2.36501

C -0.72295 -0.07544 -1.34899

F -0.23308 -2.28428 -2.19008

N -1.36992 -0.777 -0.3965

O -0.7216 1.14307 -1.44756

C -2.17561 -0.14106 0.64753

C -2.08664 -0.97822 1.93049

C -3.62269 0.08657 0.22059

C -4.28802 1.24668 0.62626

C -5.62558 1.45501 0.29458

C -6.3165 0.50295 -0.45278

C -5.66002 -0.65542 -0.86608

C -4.32329 -0.86129 -0.53078

H 3.91738 1.65017 -2.93723

H 5.3823 -0.09235 -1.94525

H 4.39177 -2.22623 -1.1535

H 1.95737 -2.61396 -1.35472

H 1.48239 1.26199 -3.12726

H -0.29063 -0.64381 -3.35856

H -1.30696 -1.78376 -0.42968

H -1.72325 0.83675 0.82349

H -2.65868 -0.50405 2.72972

H -1.04743 -1.07565 2.25347

H -2.50061 -1.97852 1.77113

H -3.75268 1.99696 1.19963

H -6.12416 2.36397 0.6124

H -7.35548 0.66496 -0.71654

H -6.18796 -1.39883 -1.45306

H -3.82108 -1.7607 -0.86971

**Ball-cylinder model for (*S*)-FPA-amide 2 and cartesian coordinates (Gaussian 09).**


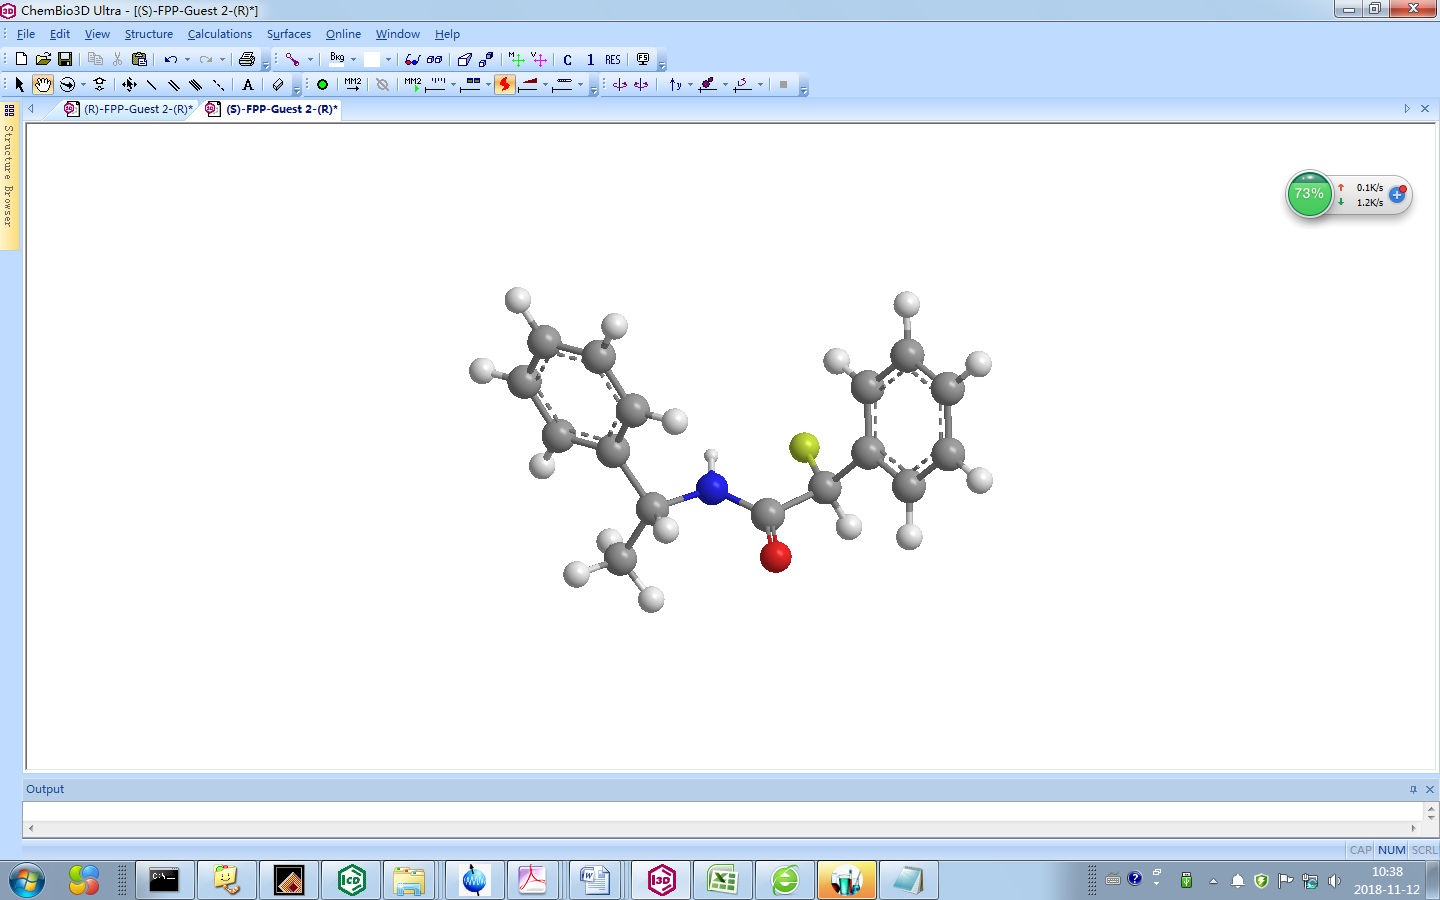
 δα-F*S* (calcd.) = -192.32 ppm

C 2.25998 1.01519 -4.06901

C 3.58576 1.04751 -3.64197

C 3.95546 0.36466 -2.48351

C 3.00531 -0.34871 -1.75754

C 1.67423 -0.37851 -2.18295

C 1.30454 0.30745 -3.34153

C 0.64307 -1.13268 -1.37353

C 0.21404 -0.34854 -0.11843

F -0.48258 -1.41444 -2.17045

N -1.05938 0.09071 -0.12091

O 1.02586 -0.1616 0.77845

C -1.64502 0.86124 0.98791

C -2.35162 -0.06681 1.98099

C -2.50276 1.98459 0.41438

C -1.86589 3.05466 -0.22889

C -2.6015 4.09852 -0.77971

C -3.99491 4.09133 -0.69746

C -4.63883 3.03442 -0.06141

C -3.89751 1.9879 0.49092

H 1.9658 1.54074 -4.9705

H 4.32754 1.59771 -4.20959

H 4.98583 0.38204 -2.14703

H 3.29292 -0.87608 -0.85604

H 0.27618 0.27714 -3.67791

H 1.03816 -2.0923 -1.03338

H -1.64648 -0.16271 -0.90244

H -0.7914 1.31364 1.49775

H -2.76681 0.50234 2.81612

H -1.63205 -0.78395 2.37982

H -3.16021 -0.62722 1.50518

H -0.78284 3.0663 -0.29504

H -2.08959 4.92 -1.26838

H -4.57083 4.90512 -1.12332

H -5.72072 3.02032 0.00969

H -4.41937 1.17858 0.98644

**Ball-cylinder model for (*R*)-FPA-amide 3 and cartesian coordinates (Gaussian 09).**


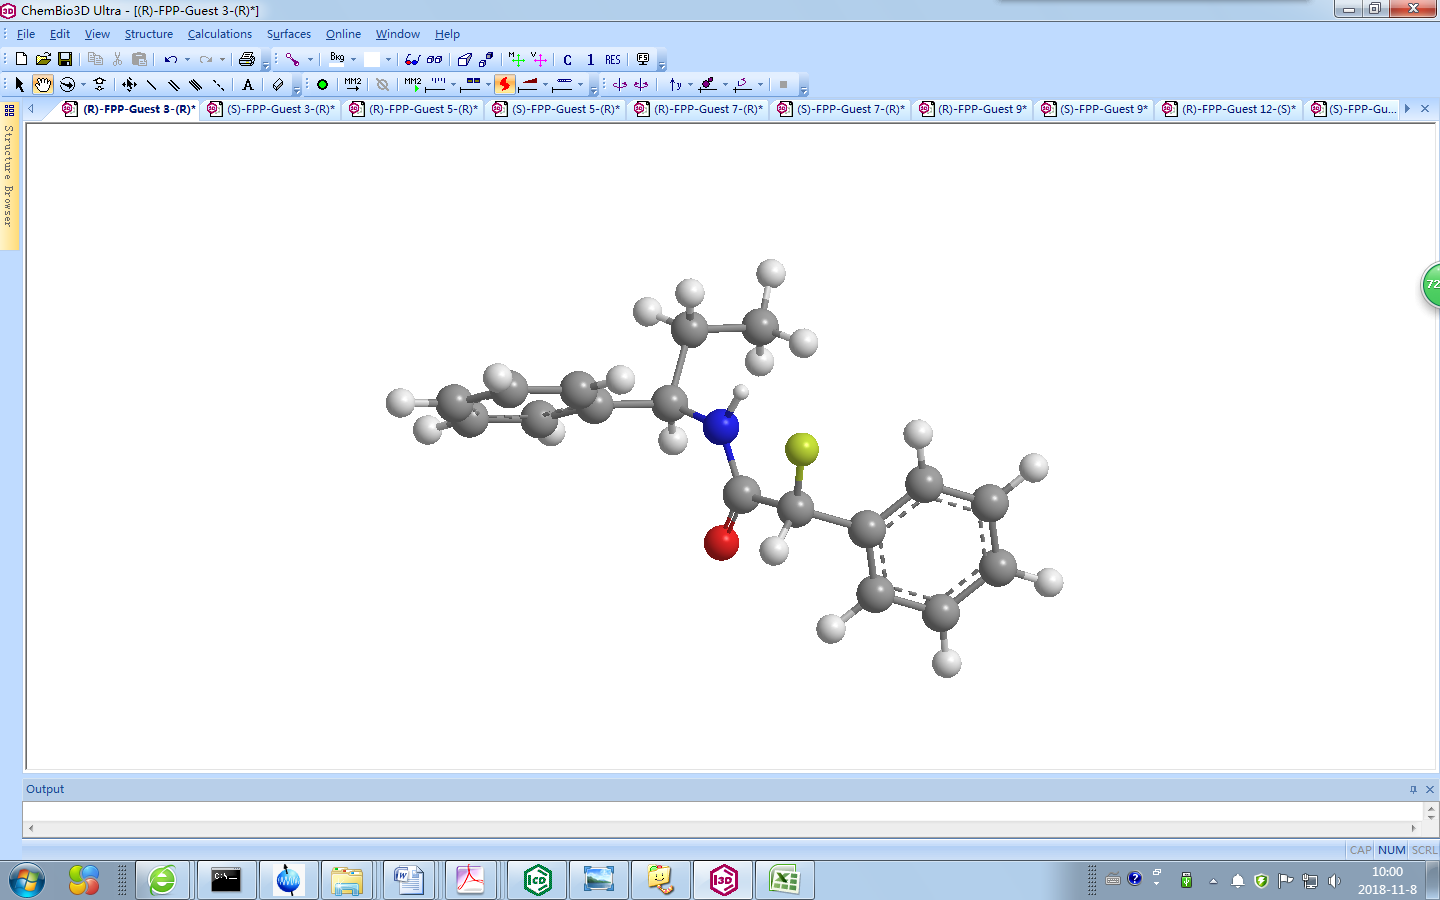
 δα-F*R* (calcd.) = -193.84 ppm

C 3.62342 -1.87796 -2.0011

C 3.07441 -2.94481 -2.71249

C 1.7966 -2.82712 -3.25353

C 1.06625 -1.6512 -3.08396

C 1.61488 -0.58333 -2.37176

C 2.9002 -0.70059 -1.83303

C 0.83335 0.69808 -2.17287

C 0.40166 0.89897 -0.70764

F -0.29942 0.7072 -3.00921

N -0.9253 0.81154 -0.48298

O 1.25023 1.11275 0.1461

C -1.5263 0.98997 0.83893

C -2.72465 0.03274 1.00123

C -1.92591 2.43633 1.11602

C -1.86179 2.92526 2.4247

C -2.26837 4.22393 2.72283

C -2.7449 5.05656 1.71135

C -2.80842 4.58055 0.40322

C -2.40174 3.27997 0.10863

C -2.34769 -1.44993 0.94852

H 4.61873 -1.96023 -1.57936

H 3.64101 -3.85924 -2.84641

H 1.3637 -3.64984 -3.81137

H 0.07724 -1.55862 -3.51329

H 3.32355 0.12439 -1.27379

H 1.43325 1.56783 -2.44979

H -1.52296 0.65438 -1.2811

H -0.75216 0.71335 1.55842

H -3.20146 0.26044 1.95849

H -3.46838 0.26649 0.22945

H -1.48243 2.28636 3.21612

H -2.20466 4.58779 3.74233

H -3.05737 6.06923 1.93968

H -3.17137 5.22276 -0.3916

H -2.44298 2.93038 -0.91686

H -3.23269 -2.07657 1.08408

H -1.89169 -1.71841 -0.00733

H -1.63508 -1.70101 1.73959

**Ball-cylinder model for (*S*)-FPA-amide 3 and cartesian coordinates (Gaussian 09).**


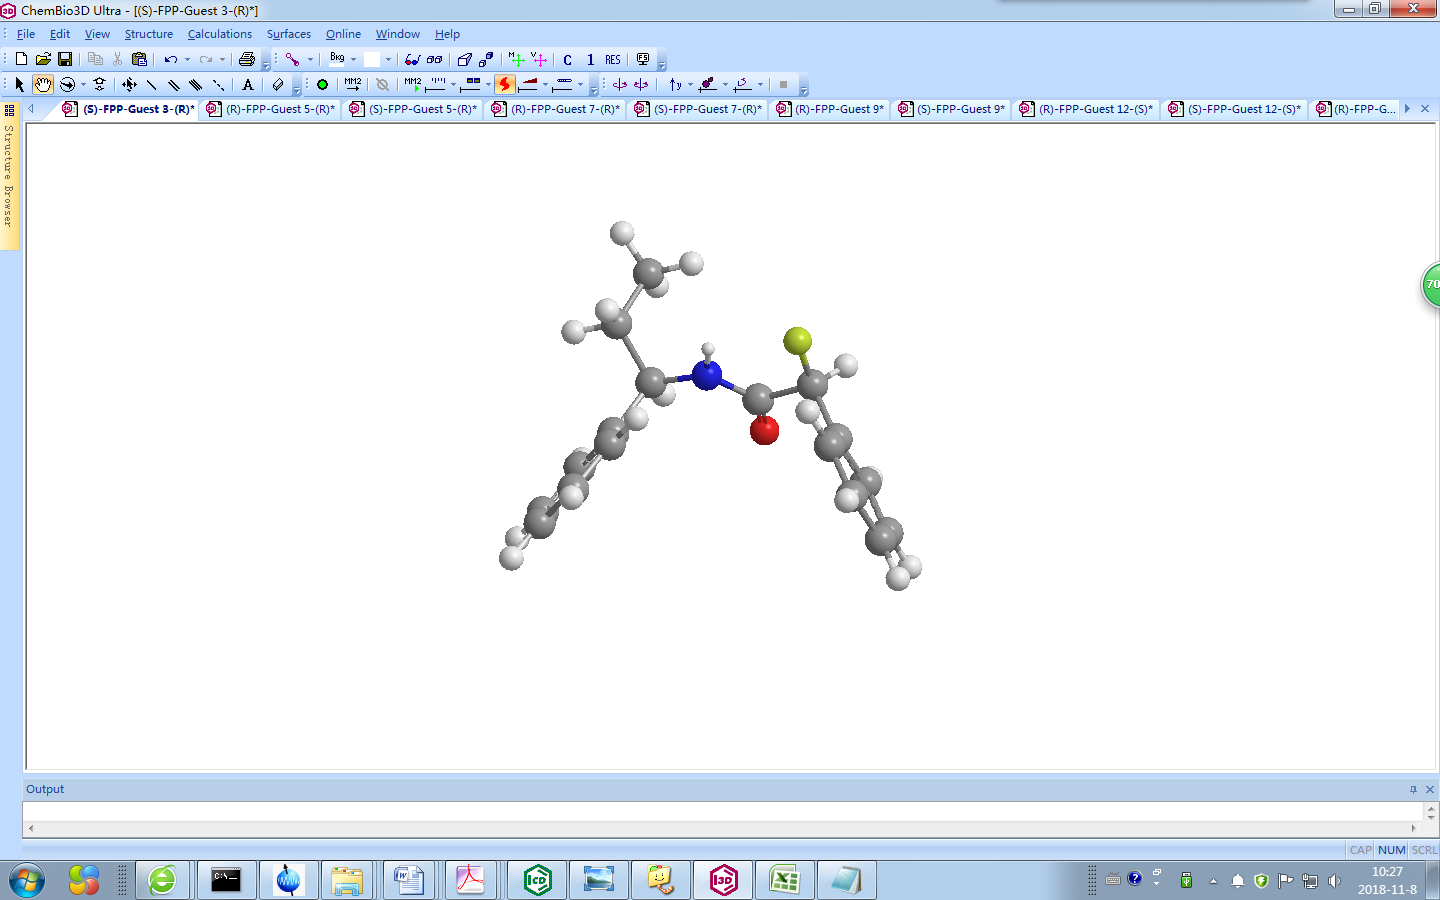
 δα-F*S* (calcd.) = -193.54 ppm

C 1.44212 -0.15758 -4.66439

C 2.63229 0.56511 -4.63912

C 3.34786 0.67497 -3.44687

C 2.87776 0.06437 -2.28771

C 1.68081 -0.65859 -2.31139

C 0.96475 -0.76693 -3.50464

C 1.17248 -1.31076 -1.04339

C 0.66595 -0.28063 -0.01579

F 0.14549 -2.22448 -1.34985

N -0.6598 -0.31712 0.22975

O 1.46259 0.48193 0.5121

C -1.31931 0.56192 1.19669

C -2.3757 -0.23247 1.99172

C -1.92259 1.80396 0.54944

C -1.90609 3.01709 1.24434

C -2.49567 4.1581 0.704

C -3.11048 4.10181 -0.5456

C -3.1287 2.89834 -1.24838

C -2.53951 1.75863 -0.70395

C -1.79138 -1.36936 2.83371

H 0.88102 -0.25025 -5.58744

H 3.00249 1.03771 -5.54177

H 4.27635 1.23388 -3.41929

H 3.42974 0.15763 -1.36062

H 0.0438 -1.33472 -3.52852

H 1.96498 -1.8825 -0.55526

H -1.20167 -1.02083 -0.25009

H -0.53385 0.88967 1.88146

H -2.90455 0.4746 2.63672

H -3.12423 -0.62208 1.29103

H -1.42051 3.07154 2.21365

H -2.46643 5.09179 1.25462

H -3.56513 4.98926 -0.97103

H -3.59877 2.84625 -2.22421

H -2.55145 0.83358 -1.26942

H -2.5819 -1.88996 3.3798

H -1.2735 -2.10559 2.21409

H -1.07481 -0.98612 3.56606

**Ball-cylinder model for (*R*)-FPA-amide 4 and cartesian coordinates (Gaussian 09).**

**
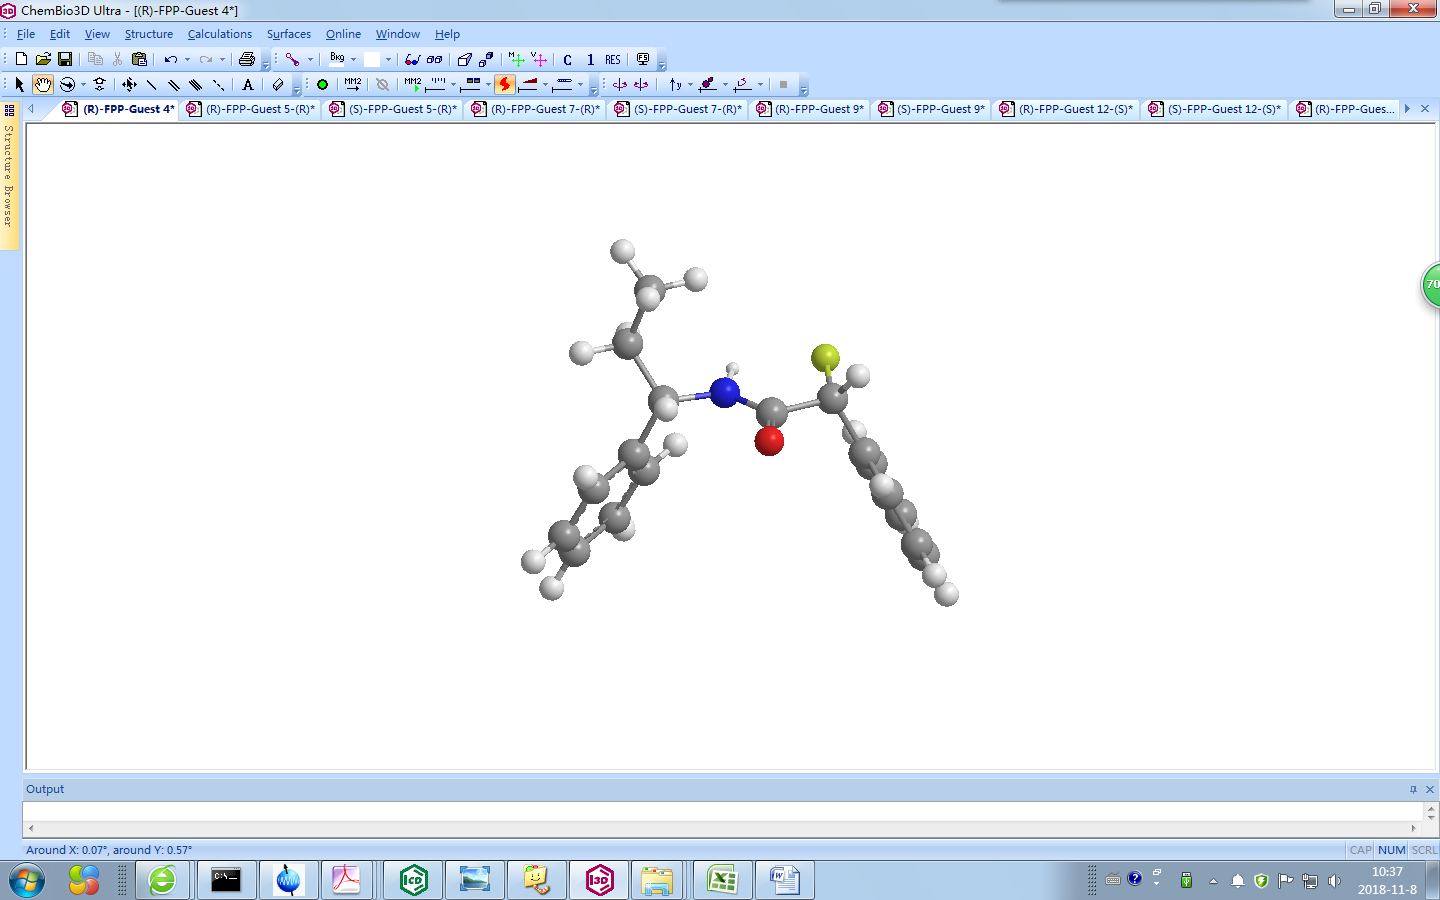
** δα-F*R* (calcd.) = -193.54 ppm

C 1.904108 -0.770795 4.065191

C 3.094278 -0.048105 4.039921

C 3.809848 0.061755 2.847671

C 3.339748 -0.548845 1.688511

C 2.142798 -1.271805 1.712191

C 1.426738 -1.380145 2.905441

C 1.634468 -1.923975 0.444191

C 1.127938 -0.893845 -0.583409

F 0.607478 -2.837695 0.750651

N -0.197812 -0.930335 -0.828949

O 1.924578 -0.131285 -1.111299

C -0.857322 -0.051295 -1.795889

C -1.913712 -0.845685 -2.590919

C -1.460602 1.190745 -1.148639

C -1.444102 2.403875 -1.843539

C -2.033682 3.544885 -1.303199

C -2.648492 3.488595 -0.053599

C -2.666712 2.285125 0.649181

C -2.077522 1.145415 0.104751

C -1.329392 -1.982575 -3.432909

H 1.343008 -0.863465 4.988241

H 3.464478 0.424495 4.942571

H 4.738338 0.620665 2.820091

H 3.891728 -0.455585 0.761421

H 0.505788 -1.947935 2.929321

H 2.426968 -2.495715 -0.043939

H -0.739682 -1.634045 -0.349109

H -0.071862 0.276455 -2.480659

H -2.442562 -0.138615 -3.235919

H -2.662242 -1.235295 -1.890229

H -0.958522 2.458325 -2.812849

H -2.004442 4.478575 -1.853819

H -3.103142 4.376045 0.371831

H -3.136782 2.233035 1.625011

H -2.089462 0.220365 0.670221

H -2.119912 -2.503175 -3.978999

H -0.811512 -2.718805 -2.813289

H -0.612822 -1.599335 -4.165259

**Ball-cylinder model for (*S*)-FPA-amide 4 and cartesian coordinates (Gaussian 09).**


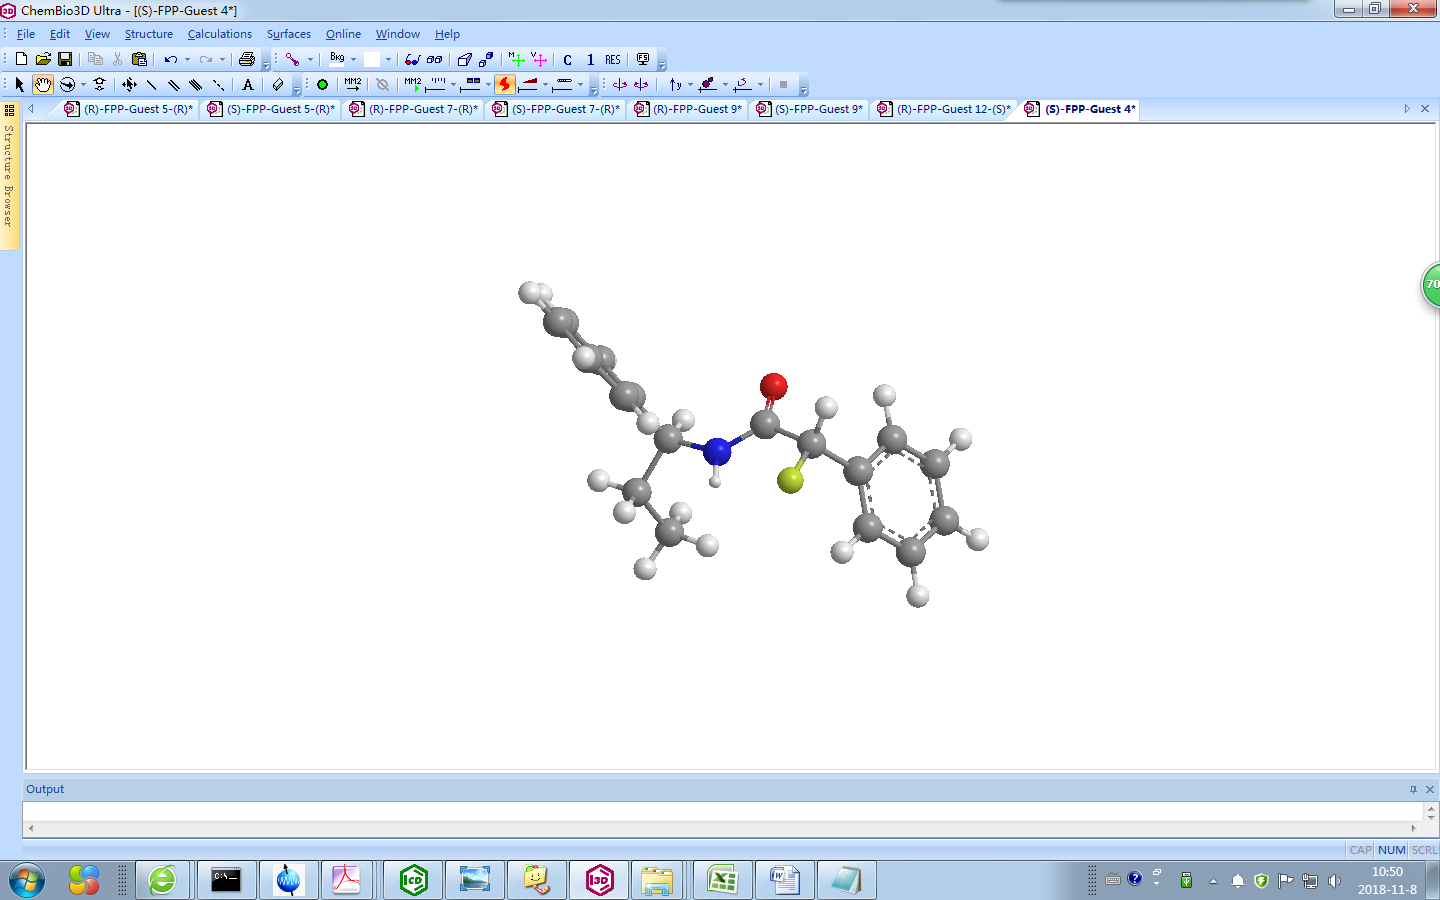
 δα-F*S* (calcd.) = -193.84 ppm

C 4.120242 -2.506339 1.664001

C 3.571232 -3.573189 2.375391

C 2.293422 -3.455499 2.916431

C 1.563072 -2.279579 2.746861

C 2.111702 -1.211709 2.034661

C 3.397022 -1.328969 1.495931

C 1.330172 0.069701 1.835771

C 0.898482 0.270591 0.370541

F 0.197402 0.078821 2.672111

N -0.428478 0.183161 0.145881

O 1.747052 0.484371 -0.483199

C -1.029478 0.361591 -1.176029

C -2.227828 -0.595639 -1.338329

C -1.429088 1.807951 -1.453119

C -1.364968 2.296881 -2.761799

C -1.771548 3.595551 -3.059929

C -2.248078 4.428181 -2.048449

C -2.311598 3.952171 -0.740319

C -1.904918 2.651591 -0.445729

C -1.850868 -2.078309 -1.285619

H 5.115552 -2.588609 1.242261

H 4.137832 -4.487619 2.509311

H 1.860522 -4.278219 3.474271

H 0.574062 -2.186999 3.176191

H 3.820372 -0.503989 0.936691

H 1.930072 0.939451 2.112691

H -1.026138 0.026001 0.944001

H -0.255338 0.084971 -1.895519

H -2.704638 -0.367939 -2.295589

H -2.971558 -0.361889 -0.566549

H -0.985608 1.657981 -3.553219

H -1.707838 3.959411 -4.079429

H -2.560548 5.440851 -2.276779

H -2.674548 4.594381 0.054501

H -1.946158 2.302001 0.579761

H -2.735868 -2.704949 -1.421179

H -1.394868 -2.346789 -0.329769

H -1.138258 -2.329389 -2.076689

**Ball-cylinder model for (*R*)-FPA-amide 5 and cartesian coordinates (Gaussian 09).**

**
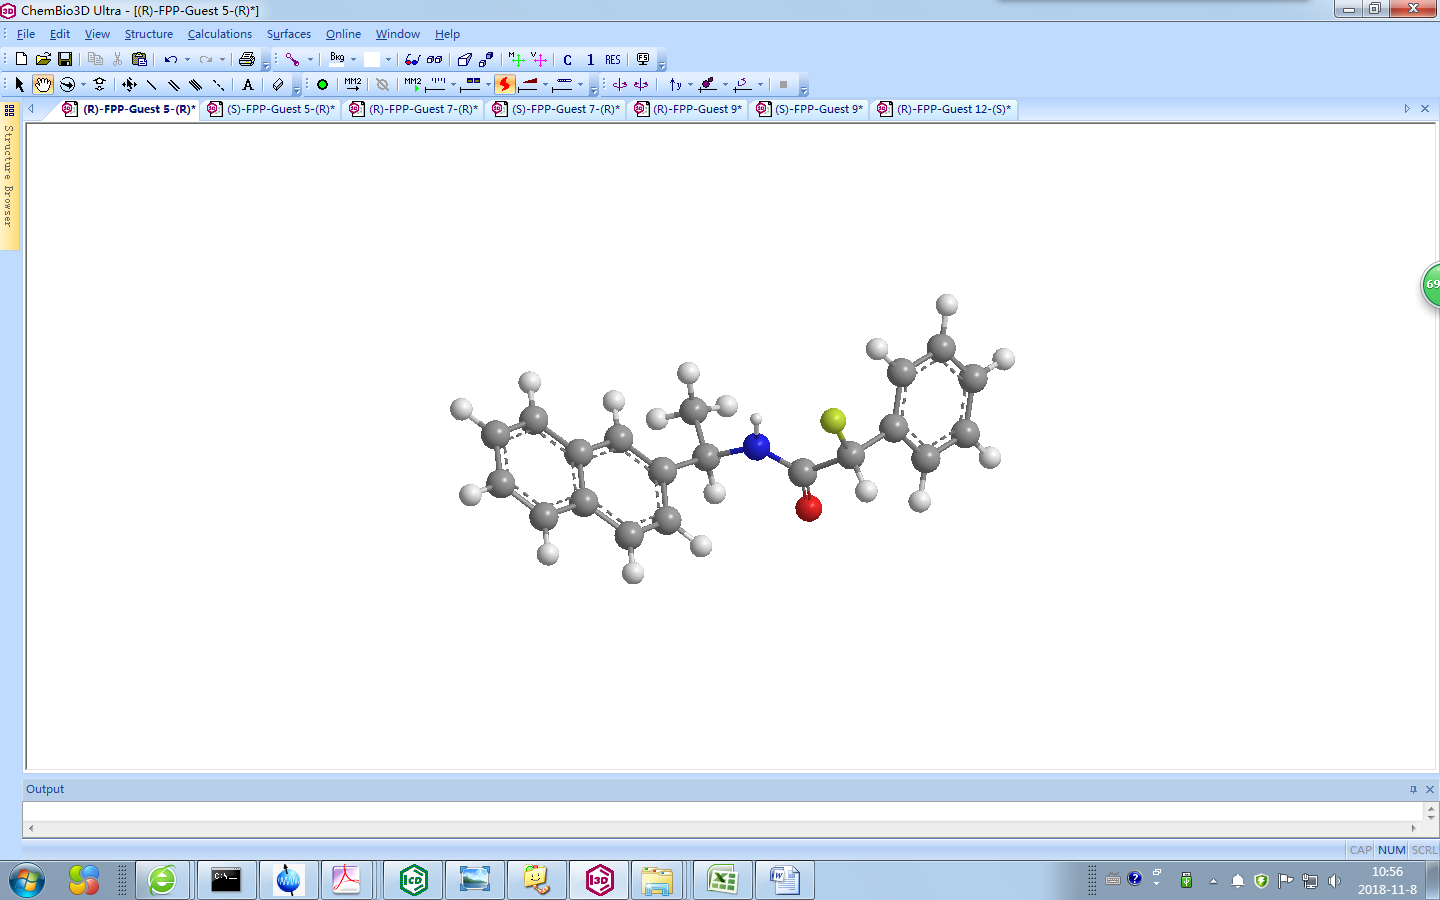
** δα-F*R* (calcd.) = -193.96 ppm

C -0.17122 -4.94277 3.2431

C -1.39177 -5.61132 3.18583

C -2.54985 -4.90717 2.85644

C -2.4882 -3.5426 2.58785

C -1.26262 -2.87145 2.64092

C -0.10399 -3.57718 2.96974

C -1.20293 -1.39112 2.33112

C -1.38713 -1.10616 0.82839

F 0.01965 -0.85504 2.77501

N -0.30475 -0.60542 0.20082

O -2.4683 -1.33948 0.30386

C -0.27584 -0.2822 -1.23374

C 0.57143 -1.30488 -1.99525

C 0.13245 1.17561 -1.41472

C 1.32712 1.56033 -1.97816

C 1.67611 2.9319 -2.11786

C 0.76263 3.93187 -1.66176

C -0.46676 3.51244 -1.08522

C -0.76928 2.18126 -0.96491

C 2.90558 3.34086 -2.69727

C 3.21664 4.67473 -2.81959

C 2.31156 5.66362 -2.36804

C 1.11202 5.29956 -1.80279

H 0.73304 -5.48204 3.50183

H -1.44239 -6.67288 3.39961

H -3.50422 -5.41954 2.81317

H -3.38694 -2.99777 2.32634

H 0.84401 -3.05783 3.02325

H -1.99334 -0.85061 2.85677

H 0.52021 -0.4252 0.75523

H -1.31323 -0.38459 -1.56003

H 0.57189 -1.0874 -3.06572

H 0.15578 -2.30316 -1.84767

H 1.60634 -1.31498 -1.64333

H 2.03295 0.81996 -2.33633

H -1.16912 4.26544 -0.74326

H -1.71382 1.87949 -0.52472

H 3.59929 2.58191 -3.0439

H 4.15894 4.97443 -3.26414

H 2.56875 6.71179 -2.47065

H 0.41575 6.05615 -1.45632

**Ball-cylinder model for (*S*)-FPA-amide 5 and cartesian coordinates (Gaussian 09).**


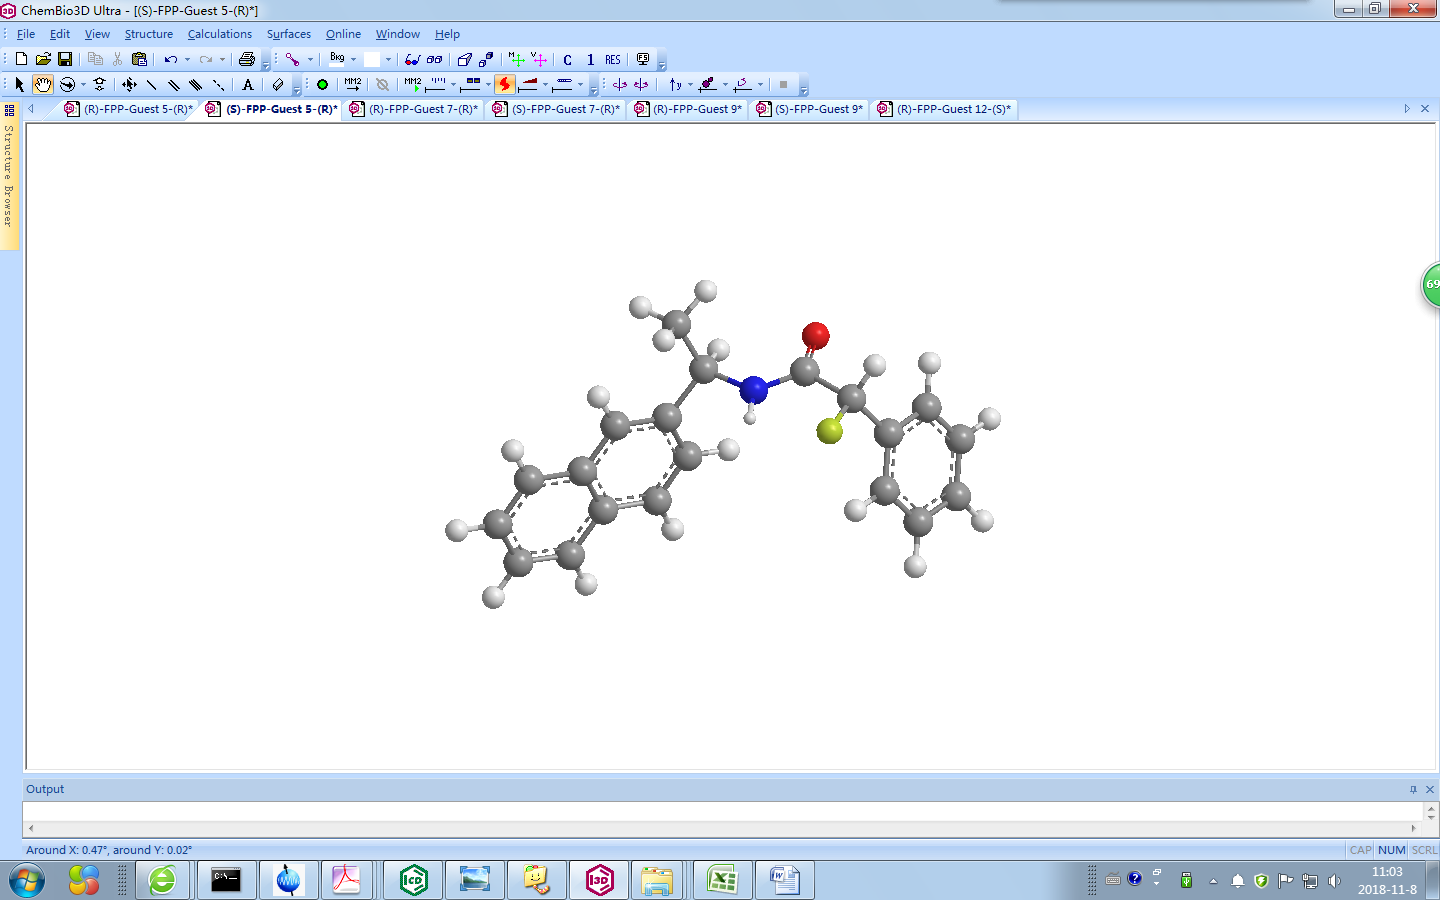
 δα-F*S* (calcd.) = -192.60 ppm

C -3.85098 -3.75286 2.85166

C -3.69023 -4.94564 2.15015

C -2.53137 -5.15725 1.40353

C -1.5378 -4.18291 1.36029

C -1.70001 -2.98383 2.06068

C -2.86128 -2.7721 2.80627

C -0.62684 -1.91976 1.98831

C -0.65287 -1.16811 0.64365

F -0.78024 -1.00794 3.04929

N -1.02706 0.12482 0.71365

O -0.35563 -1.76458 -0.38279

C -1.10249 1.00512 -0.46197

C 0.18636 1.81768 -0.61552

C -2.38985 1.8174 -0.39114

C -2.41083 3.18832 -0.27815

C -3.63418 3.9112 -0.21808

C -4.86914 3.19456 -0.27565

C -4.82445 1.77888 -0.39244

C -3.62694 1.11477 -0.44696

C -3.66802 5.32552 -0.10352

C -4.86593 5.99861 -0.04938

C -6.08775 5.28823 -0.10711

C -6.08835 3.91754 -0.21769

H -4.74726 -3.58249 3.43737

H -4.46039 -5.70764 2.18729

H -2.39747 -6.08453 0.85815

H -0.64025 -4.34719 0.77655

H -2.98379 -1.84899 3.3579

H 0.36767 -2.35937 2.09065

H -1.20109 0.51857 1.62728

H -1.1784 0.3264 -1.3154

H 0.14967 2.441 -1.51194

H 1.03353 1.13607 -0.7092

H 0.36263 2.46165 0.24994

H -1.48717 3.75362 -0.23729

H -5.75757 1.22752 -0.44241

H -3.61268 0.03391 -0.53663

H -2.73044 5.86991 -0.05987

H -4.87857 7.0792 0.03733

H -7.02527 5.83092 -0.06403

H -7.02416 3.37026 -0.26263

**Ball-cylinder model for (*R*)-FPA-amide 6 and cartesian coordinates (Gaussian 09).**

**
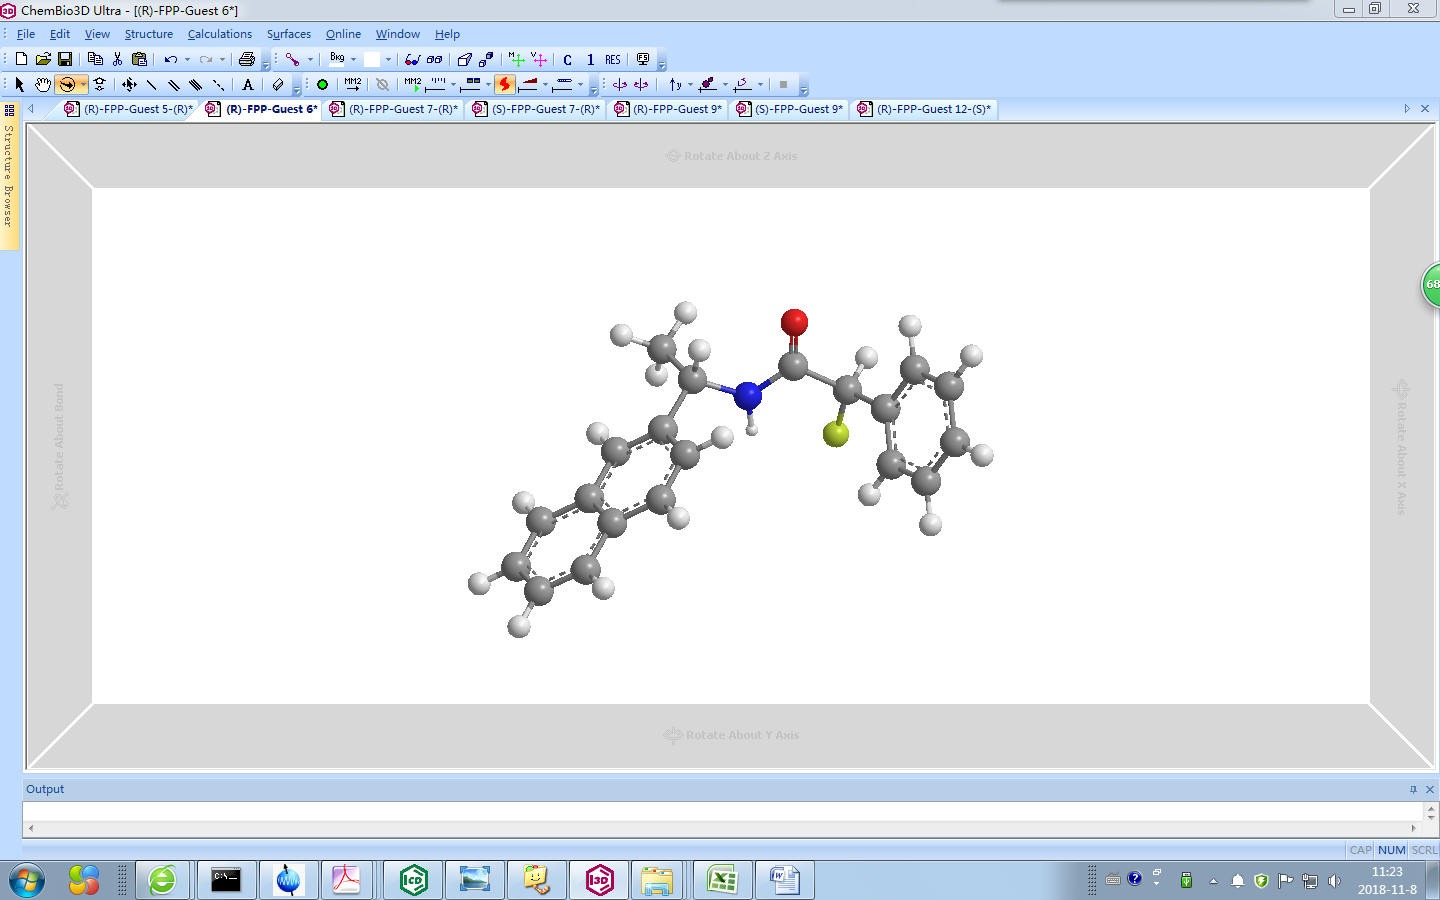
** δα-F*R* (calcd.) = -192.60 ppm

C -1.138617 -4.214970 -2.252388

C -0.977867 -5.407750 -1.550878

C 0.180993 -5.619360 -0.804258

C 1.174563 -4.645020 -0.761018

C 1.012353 -3.445940 -1.461408

C -0.148917 -3.234210 -2.206998

C 2.085523 -2.381870 -1.389038

C 2.059493 -1.630220 -0.044378

F 1.932123 -1.470050 -2.450018

N 1.685303 -0.337290 -0.114378

O 2.356733 -2.226690 0.982062

C 1.609873 0.543010 1.061242

C 2.898723 1.355570 1.214792

C 0.322513 1.355290 0.990412

C 0.301533 2.726210 0.877422

C -0.921817 3.449090 0.817352

C -2.156777 2.732450 0.874922

C -2.112087 1.316770 0.991712

C -0.914577 0.652660 1.046232

C -0.955657 4.863410 0.702792

C -2.153567 5.536500 0.648652

C -3.375387 4.826120 0.706382

C -3.375987 3.455430 0.816962

H -2.034897 -4.044600 -2.838098

H -1.748027 -6.169750 -1.588018

H 0.314893 -6.546640 -0.258878

H 2.072113 -4.809300 -0.177278

H -0.271427 -2.311100 -2.758628

H 3.080033 -2.821480 -1.491378

H 1.511273 0.056460 -1.028008

H 1.533963 -0.135710 1.914672

H 2.862033 1.978890 2.111212

H 3.745893 0.673960 1.308472

H 3.074993 1.999540 0.349332

H 1.225193 3.291510 0.836562

H -3.045207 0.765410 1.041682

H -0.900317 -0.428200 1.135902

H -0.018077 5.407800 0.659142

H -2.166207 6.617090 0.561942

H -4.312907 5.368810 0.663302

H -4.311797 2.908150 0.861902

**Ball-cylinder model for (*S*)-FPA-amide 6 and cartesian coordinates (Gaussian 09).**


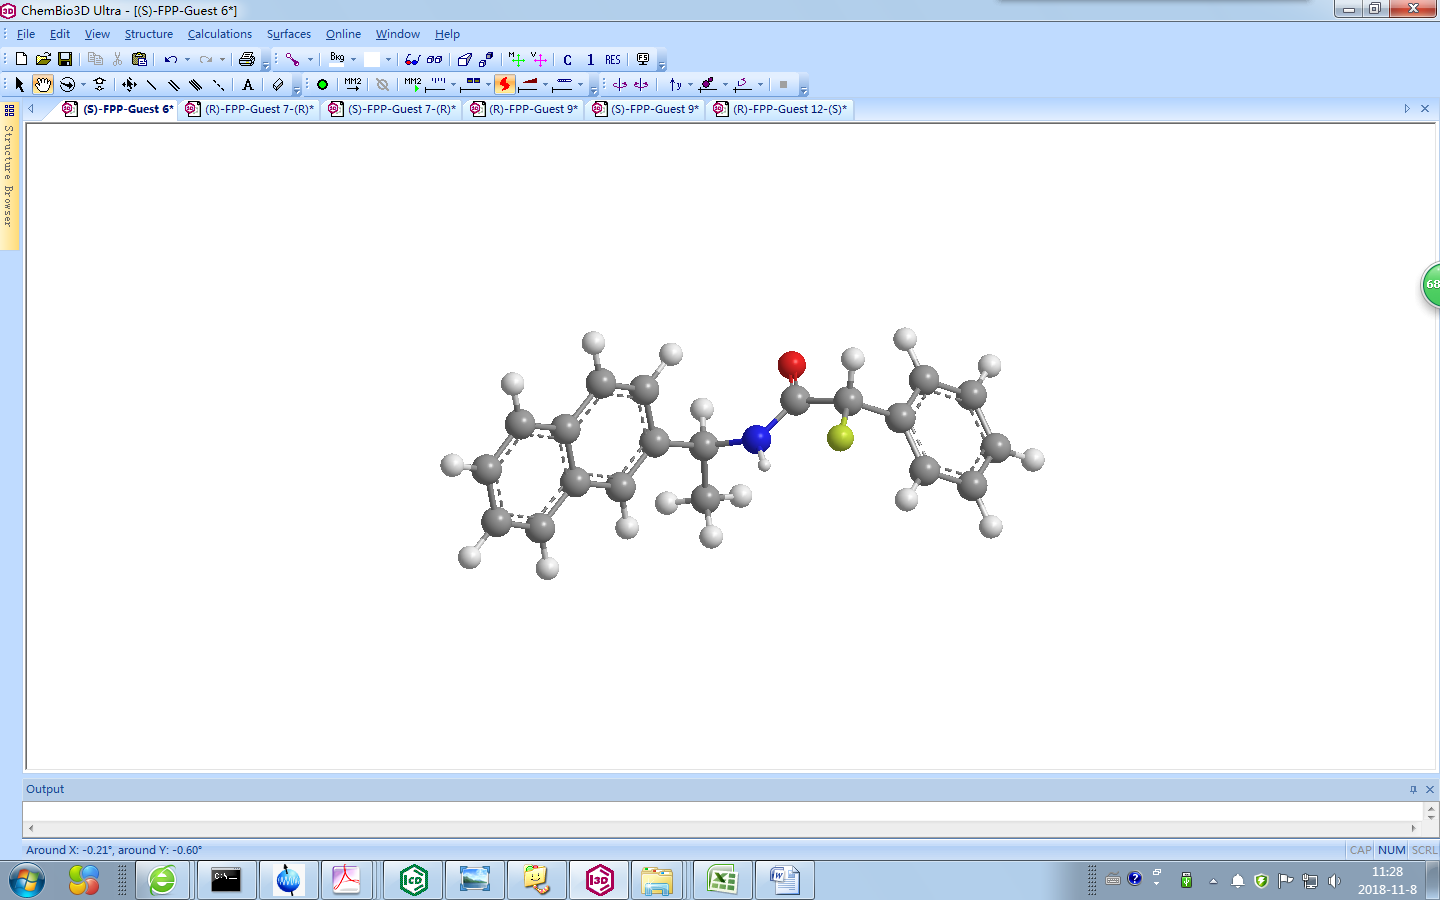
 δα-F*S* (calcd.) = -193.96 ppm

C -0.216987 -4.923954 -3.279590

C -1.437537 -5.592504 -3.222320

C -2.595617 -4.888354 -2.892930

C -2.533967 -3.523784 -2.624340

C -1.308387 -2.852634 -2.677410

C -0.149757 -3.558364 -3.006230

C -1.248697 -1.372304 -2.367610

C -1.432897 -1.087344 -0.864880

F -0.026117 -0.836224 -2.811500

N -0.350517 -0.586604 -0.237310

O -2.514067 -1.320664 -0.340350

C -0.321607 -0.263384 1.197250

C 0.525663 -1.286064 1.958760

C 0.086683 1.194426 1.378230

C 1.281353 1.579146 1.941670

C 1.630343 2.950716 2.081370

C 0.716863 3.950686 1.625270

C -0.512527 3.531256 1.048730

C -0.815047 2.200076 0.928420

C 2.859813 3.359676 2.660780

C 3.170873 4.693546 2.783100

C 2.265793 5.682436 2.331550

C 1.066253 5.318376 1.766300

H 0.687273 -5.463224 -3.538320

H -1.488157 -6.654064 -3.436100

H -3.549987 -5.400724 -2.849660

H -3.432707 -2.978954 -2.362830

H 0.798243 -3.039014 -3.059740

H -2.039107 -0.831794 -2.893260

H 0.474443 -0.406384 -0.791720

H -1.358997 -0.365774 1.523540

H 0.526123 -1.068584 3.029230

H 0.110013 -2.284344 1.811180

H 1.560573 -1.296164 1.606840

H 1.987183 0.838776 2.299840

H -1.214887 4.284256 0.706770

H -1.759587 1.898306 0.488230

H 3.553523 2.600726 3.007410

H 4.113173 4.993246 3.227650

H 2.522983 6.730606 2.434160

H 0.369983 6.074966 1.419830

**Ball-cylinder model for (*R*)-FPA-amide 7 and cartesian coordinates (Gaussian 09).**

**
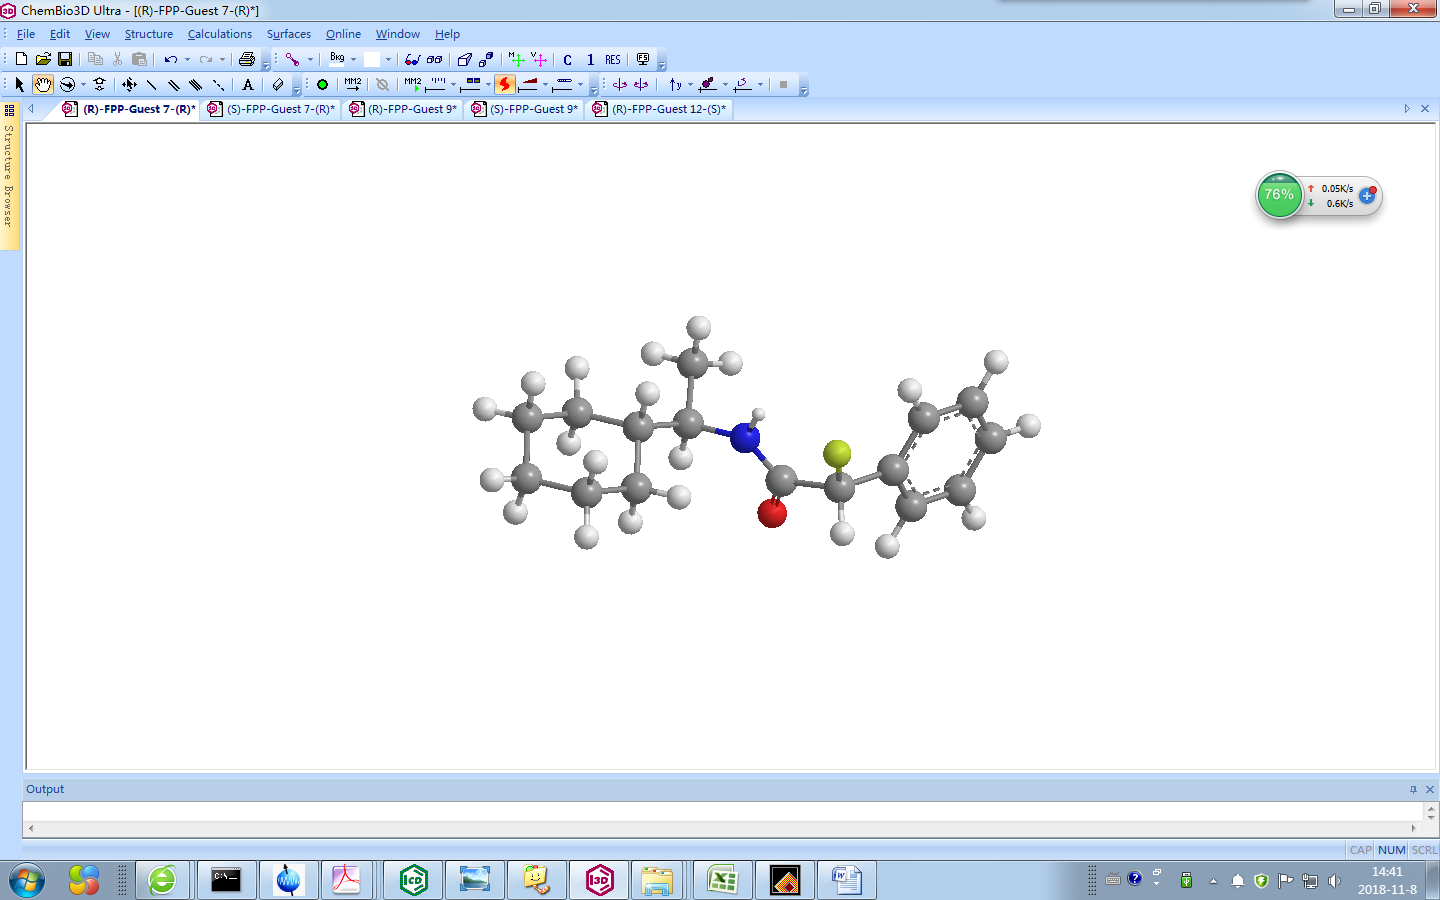
** δα-F*R* (calcd.) = -194.04 ppm

C 4.85374 0.49895 -2.9655

C 5.23287 -0.84322 -2.94606

C 4.26182 -1.8317 -2.80563

C 2.91716 -1.48422 -2.68142

C 2.53666 -0.14131 -2.70094

C 3.51199 0.85026 -2.84698

C 1.08266 0.2528 -2.55353

C 0.79032 0.89923 -1.18513

F 0.25769 -0.87314 -2.7398

N 0.00311 0.17733 -0.36634

O 1.27324 1.99582 -0.93178

C -0.38541 0.59943 0.98539

C 0.3324 -0.28283 2.01568

C -1.92706 0.60296 1.12236

C -2.59091 1.48559 0.04689

C -4.11966 1.51997 0.17817

C -4.55644 1.9697 1.5776

C -3.9107 1.0956 2.65898

C -2.38061 1.05185 2.52625

H 5.603 1.27442 -3.07745

H 6.27767 -1.11542 -3.04338

H 4.54774 -2.87745 -2.7933

H 2.16357 -2.25432 -2.58017

H 3.21855 1.89265 -2.85343

H 0.79675 0.98051 -3.31621

H -0.32683 -0.71435 -0.70803

H -0.02268 1.62561 1.08059

H 0.17686 0.08202 3.03203

H 1.40665 -0.28549 1.81998

H -0.02728 -1.31576 1.96511

H -2.27307 -0.43207 0.97399

H -2.19707 2.50671 0.13822

H -2.31254 1.13306 -0.94952

H -4.54176 2.18252 -0.58435

H -4.52302 0.51863 -0.02153

H -4.25873 3.01503 1.73072

H -5.6473 1.93857 1.66564

H -4.18283 1.4579 3.65558

H -4.30637 0.07469 2.58029

H -1.97009 2.05088 2.72676

H -1.97369 0.38673 3.29198

**Ball-cylinder model for (*S*)-FPA-amide 7 and cartesian coordinates (Gaussian 09).**


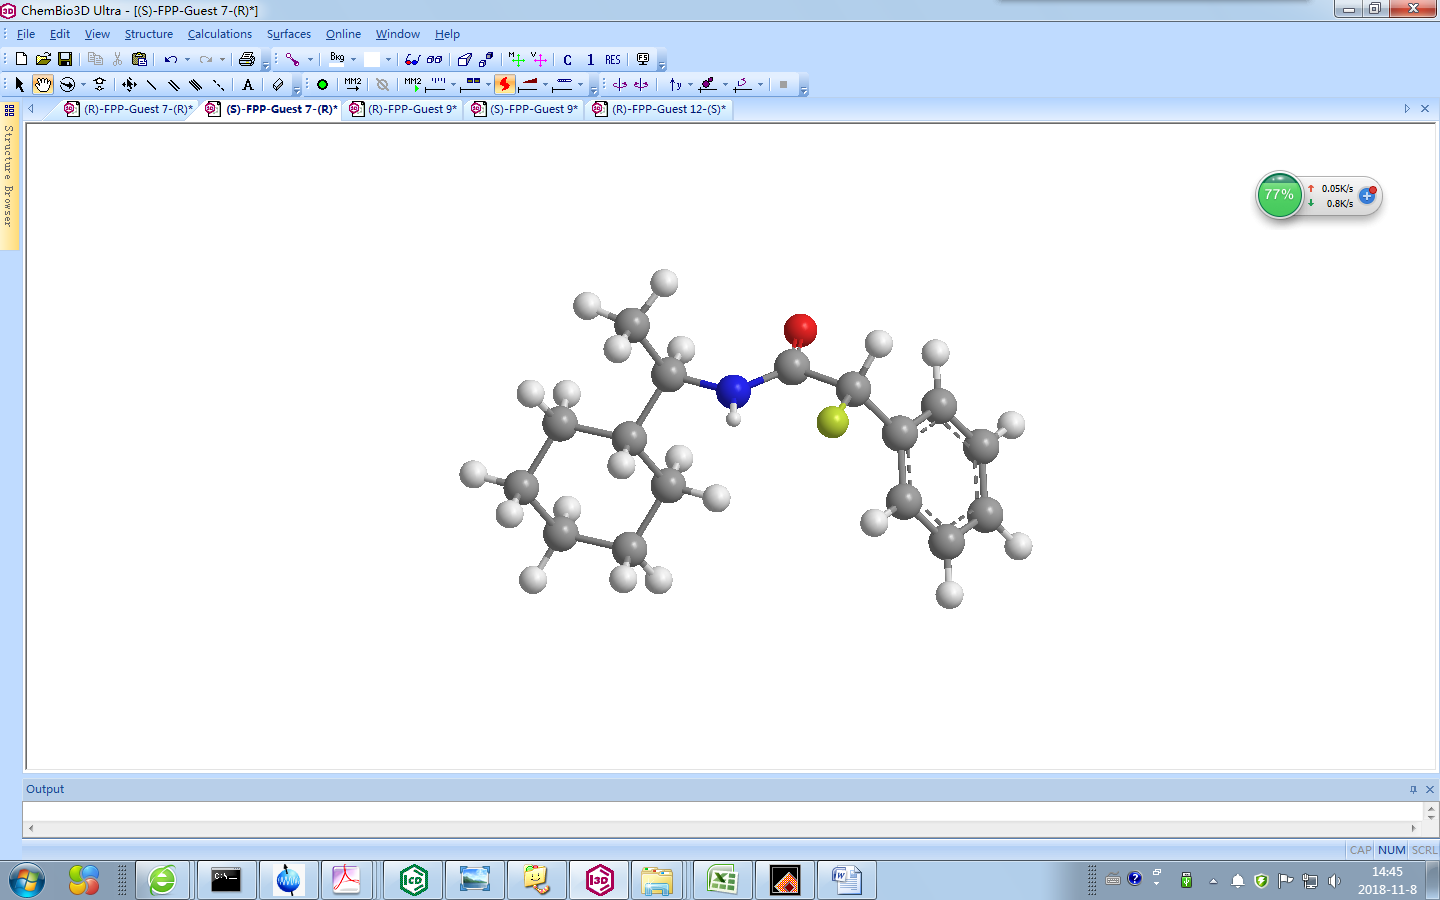
 δα-F*S* (calcd.) = -193.46 ppm

C 4.48838 -1.05131 -2.65307

C 3.95518 -2.08186 -3.42357

C 2.67328 -1.95207 -3.95782

C 1.92969 -0.79857 -3.72461

C 2.46243 0.23496 -2.94796

C 3.74548 0.10405 -2.41341

C 1.63972 1.47764 -2.68557

C 0.48344 1.21485 -1.70041

F 2.46677 2.50648 -2.19497

N 0.58948 1.83635 -0.51094

O -0.43167 0.47674 -2.04278

C -0.43105 1.76742 0.54345

C -1.21884 3.08456 0.57205

C 0.22613 1.39227 1.89269

C 0.97369 0.04695 1.80551

C 1.62421 -0.34911 3.13826

C 0.59886 -0.38551 4.27816

C -0.15185 0.94712 4.38053

C -0.79686 1.34978 3.04549

H 5.48543 -1.14249 -2.23708

H 4.53471 -2.97875 -3.61036

H 2.25247 -2.74824 -4.5614

H 0.93139 -0.70201 -4.13308

H 4.16433 0.90772 -1.82192

H 1.19164 1.84966 -3.60978

H 1.36666 2.47024 -0.38817

H -1.10187 0.95946 0.24188

H -2.07662 3.024 1.24344

H -1.59211 3.31654 -0.42765

H -0.58475 3.9141 0.90172

H 0.96233 2.17657 2.12943

H 0.25974 -0.73223 1.50664

H 1.73169 0.08999 1.01955

H 2.11553 -1.322 3.03552

H 2.41266 0.37385 3.38544

H -0.12046 -1.19338 4.09142

H 1.0914 -0.61792 5.22796

H -0.92029 0.89307 5.15845

H 0.54959 1.73275 4.69034

H -1.58556 0.62871 2.79068

H -1.28514 2.3203 3.16323

**Ball-cylinder model for (*R*)-FPA-amide 8 and cartesian coordinates (Gaussian 09).**

**
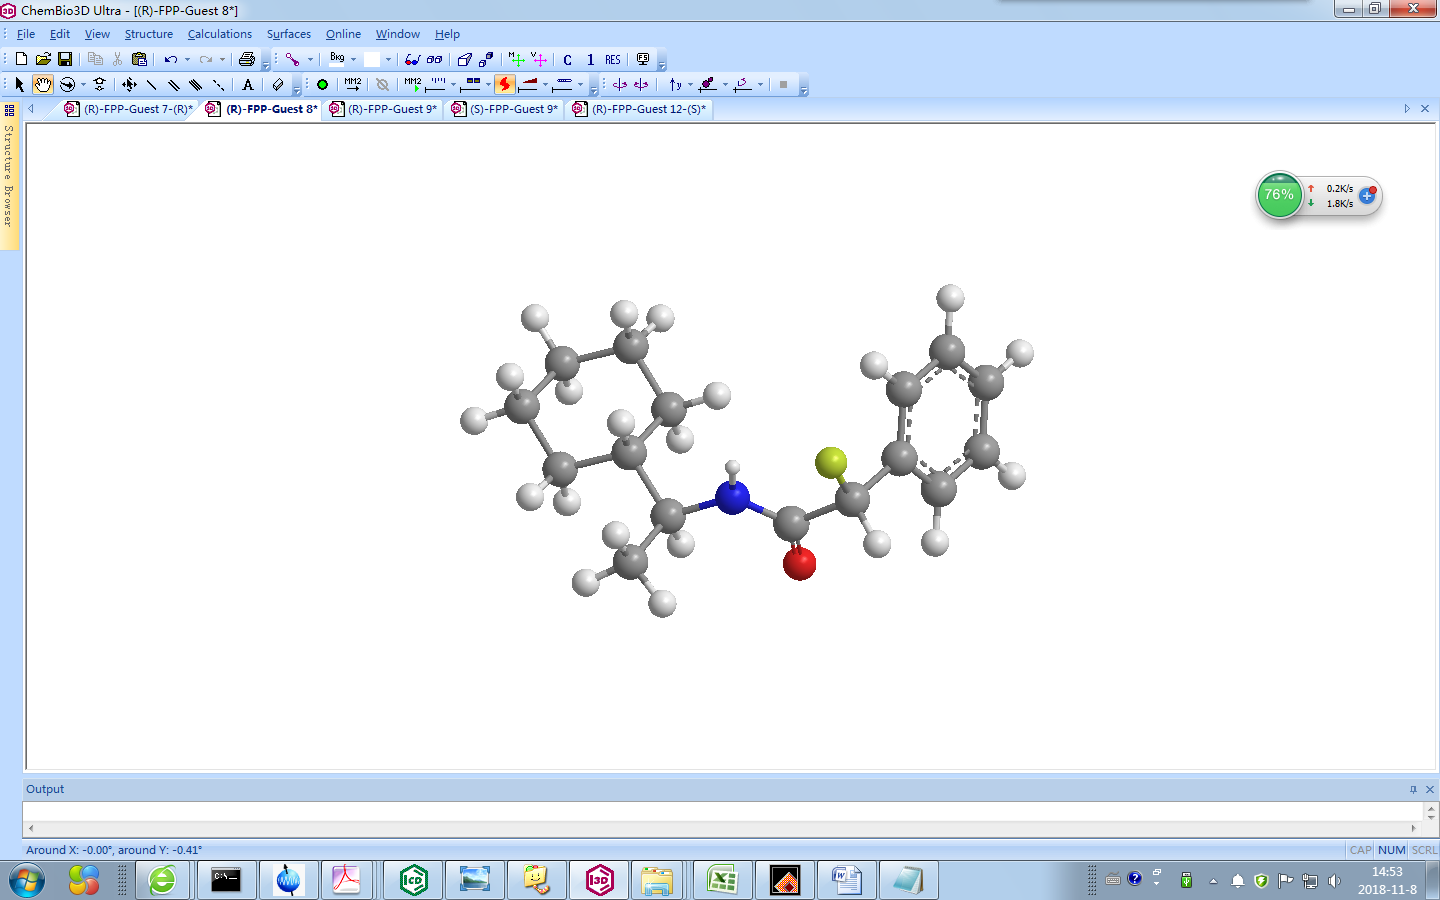
** δα-F*R* (calcd.) = -193.46 ppm

C 3.400350 -1.613278 2.877394

C 2.867150 -2.643828 3.647894

C 1.585250 -2.514038 4.182144

C 0.841660 -1.360538 3.948934

C 1.374400 -0.327008 3.172284

C 2.657450 -0.457918 2.637734

C 0.551690 0.915672 2.909894

C -0.604590 0.652882 1.924734

F 1.378740 1.944512 2.419294

N -0.498550 1.274382 0.735264

O -1.519700 -0.085228 2.267104

C -1.519080 1.205452 -0.319126

C -2.306870 2.522592 -0.347726

C -0.861900 0.830302 -1.668366

C -0.114340 -0.515018 -1.581186

C 0.536180 -0.911078 -2.913936

C -0.489170 -0.947478 -4.053836

C -1.239880 0.385152 -4.156206

C -1.884890 0.787812 -2.821166

H 4.397400 -1.704458 2.461404

H 3.446680 -3.540718 3.834684

H 1.164440 -3.310208 4.785724

H -0.156640 -1.263978 4.357404

H 3.076300 0.345752 2.046244

H 0.103610 1.287692 3.834104

H 0.278630 1.908272 0.612494

H -2.189900 0.397492 -0.017556

H -3.164650 2.462032 -1.019116

H -2.680140 2.754572 0.651974

H -1.672780 3.352132 -0.677396

H -0.125700 1.614602 -1.905106

H -0.828290 -1.294198 -1.282316

H 0.643660 -0.471978 -0.795226

H 1.027500 -1.883968 -2.811196

H 1.324630 -0.188118 -3.161116

H -1.208490 -1.755348 -3.867096

H 0.003370 -1.179888 -5.003636

H -2.008320 0.331102 -4.934126

H -0.538440 1.170782 -4.466016

H -2.673590 0.066742 -2.566356

H -2.373170 1.758332 -2.938906

**Ball-cylinder model for (*S*)-FPA-amide 8 and cartesian coordinates (Gaussian 09).**


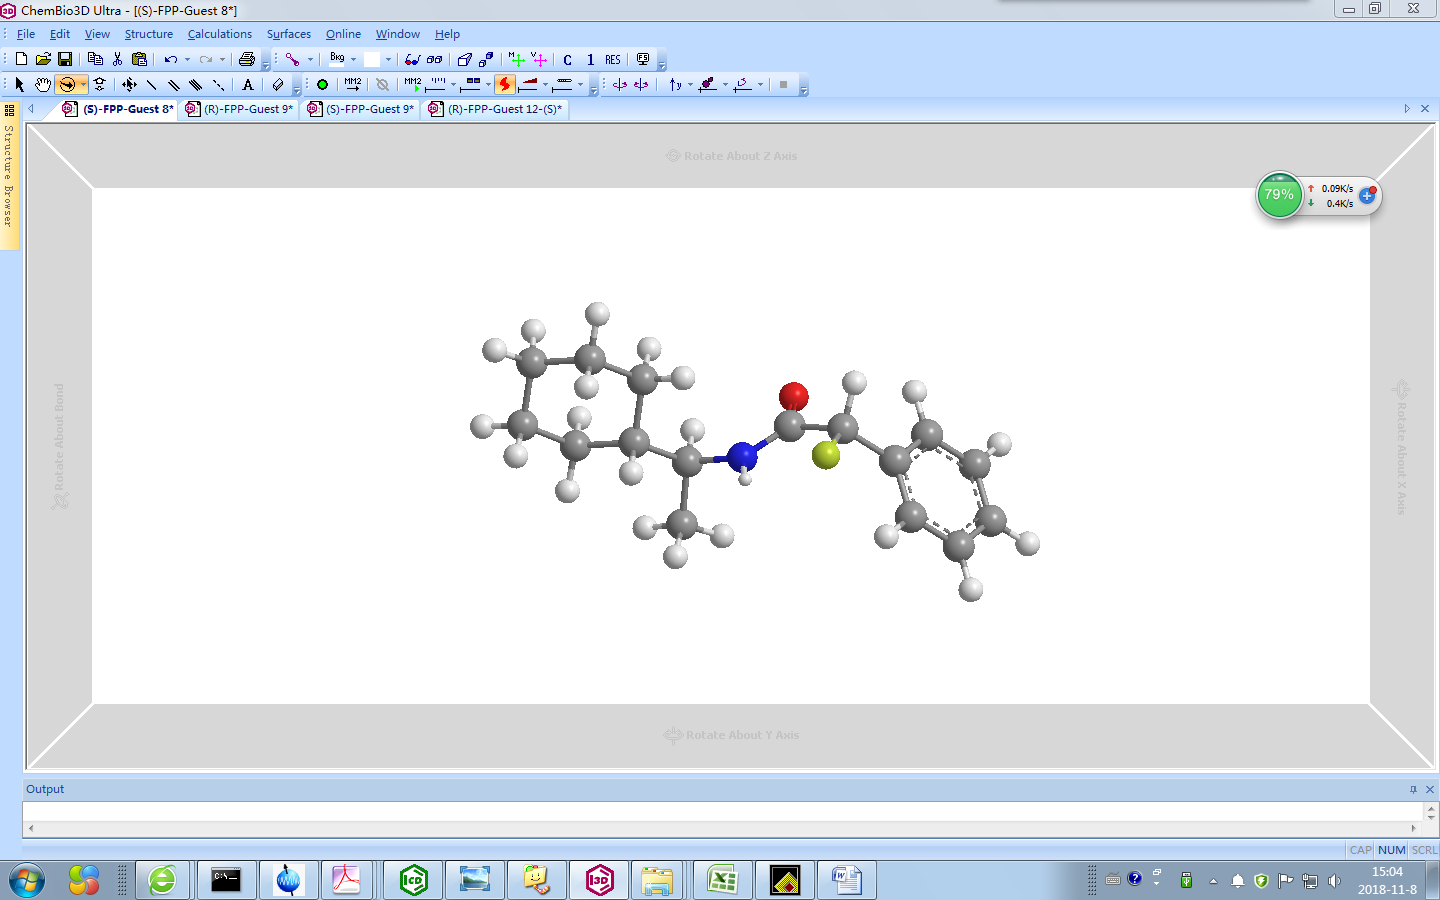
 δα-F*S* (calcd.) = -194.04 ppm

C 5.029096 0.019239 2.748957

C 5.408226 -1.322931 2.729517

C 4.437176 -2.311411 2.589087

C 3.092516 -1.963931 2.464877

C 2.712016 -0.621021 2.484397

C 3.687346 0.370549 2.630437

C 1.258016 -0.226911 2.336987

C 0.965676 0.419519 0.968587

F 0.433046 -1.352851 2.523257

N 0.178466 -0.302381 0.149797

O 1.448596 1.516109 0.715237

C -0.210054 0.119719 -1.201933

C 0.507756 -0.762541 -2.232223

C -1.751704 0.123249 -1.338903

C -2.415554 1.005879 -0.263433

C -3.944304 1.040259 -0.394713

C -4.381084 1.489989 -1.794143

C -3.735344 0.615889 -2.875523

C -2.205254 0.572139 -2.742793

H 5.778356 0.794709 2.860907

H 6.453026 -1.595131 2.826837

H 4.723096 -3.357161 2.576757

H 2.338926 -2.734031 2.363627

H 3.393906 1.412939 2.636887

H 0.972106 0.500799 3.099667

H -0.151474 -1.194061 0.491487

H 0.152676 1.145899 -1.297133

H 0.352216 -0.397691 -3.248573

H 1.582006 -0.765201 -2.036523

H 0.148076 -1.795471 -2.181653

H -2.097714 -0.911781 -1.190533

H -2.021714 2.026999 -0.354763

H -2.137184 0.653349 0.732977

H -4.366404 1.702809 0.367807

H -4.347664 0.038919 -0.195013

H -4.083374 2.535319 -1.947263

H -5.471944 1.458859 -1.882183

H -4.007474 0.978189 -3.872123

H -4.131014 -0.405021 -2.796833

H -1.794734 1.571169 -2.943303

H -1.798334 -0.092981 -3.508523

**Ball-cylinder model for (*R*)-FPA-amide 9 and cartesian coordinates (Gaussian 09).**

**
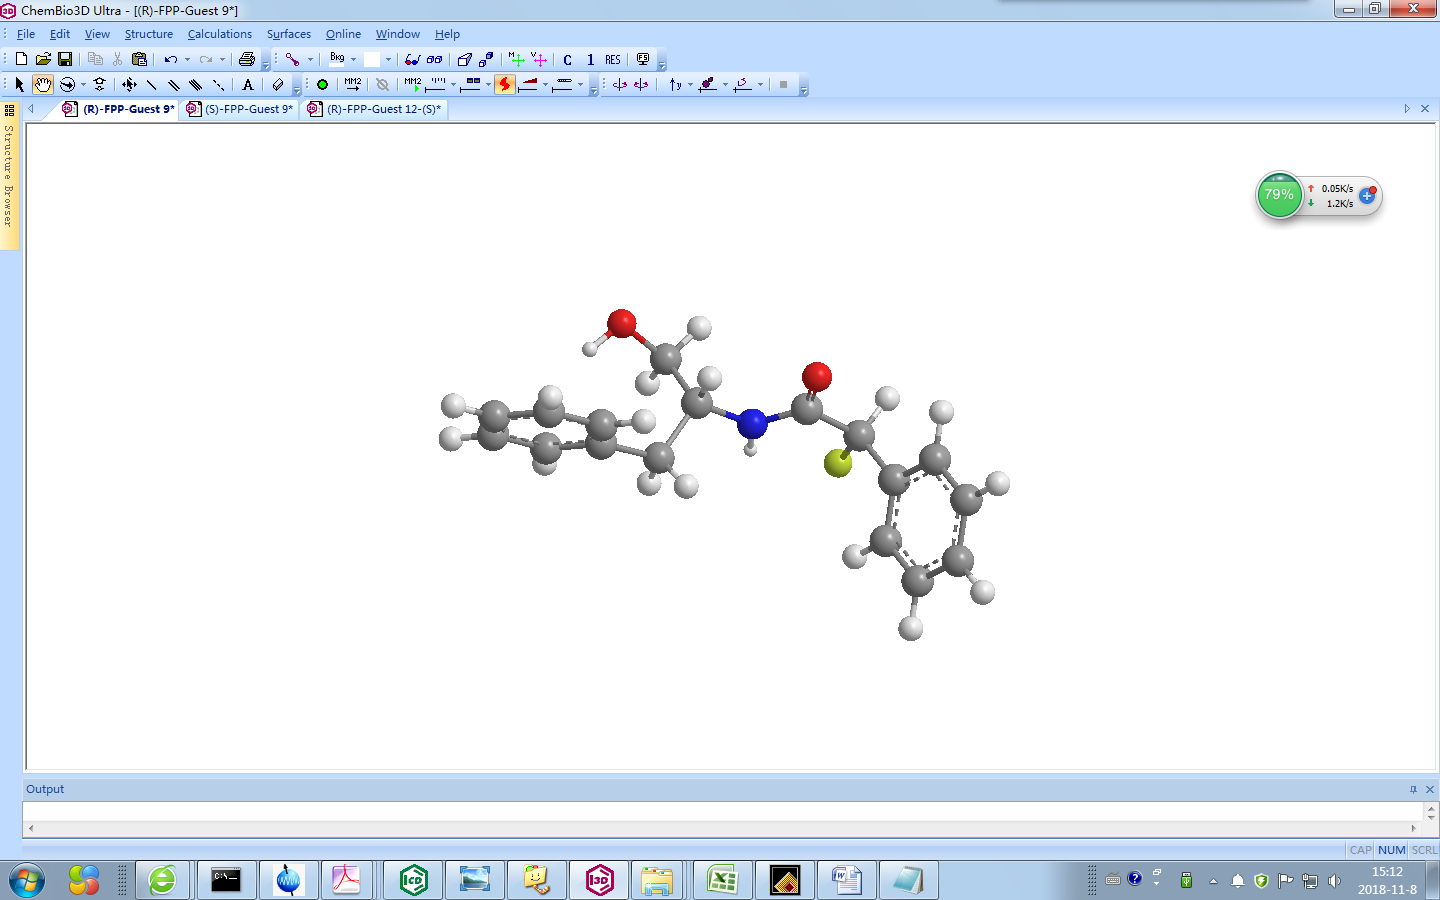
** δα-F*R* (calcd.) = -191.64 ppm

C 3.17344 -0.88465 -1.57998

C 2.92668 -1.75619 -2.64027

C 3.79235 -1.77838 -3.73171

C 4.89832 -0.93103 -3.76805

C 5.14741 -0.05935 -2.70606

C 4.28099 -0.0413 -1.60953

C 6.33234 0.87935 -2.74387

C 5.92052 2.31185 -3.13484

F 7.29987 0.39621 -3.64638

N 6.38989 2.73856 -4.32674

O 5.21207 2.95819 -2.37704

C 6.11647 4.06572 -4.87553

C 7.41151 4.90354 -4.86659

C 5.46852 3.90508 -6.27182

C 5.05171 5.19742 -6.94297

C 5.7823 5.72574 -8.01464

C 5.39895 6.92224 -8.62369

C 4.27376 7.60648 -8.17175

C 3.53274 7.08631 -7.10974

C 3.91821 5.89461 -6.50315

O 7.18143 6.29846 -5.00681

H 2.50677 -0.86504 -0.72541

H 2.06735 -2.41647 -2.61319

H 3.60922 -2.45636 -4.55765

H 5.57487 -0.95519 -4.6127

H 4.4702 0.63618 -0.78564

H 6.81464 0.94046 -1.76605

H 6.99181 2.11013 -4.83948

H 5.41144 4.53993 -4.19111

H 7.8946 4.77362 -3.89662

H 8.10277 4.52966 -5.63679

H 6.17036 3.36859 -6.9201

H 4.59264 3.26087 -6.15178

H 6.6538 5.19304 -8.38207

H 5.97772 7.31292 -9.4531

H 3.97255 8.53436 -8.64419

H 2.65188 7.60973 -6.75521

H 3.33298 5.49774 -5.68004

H 6.82382 6.45956 -5.88717

**Ball-cylinder model for (*S*)-FPA-amide 9 and cartesian coordinates (Gaussian 09).**


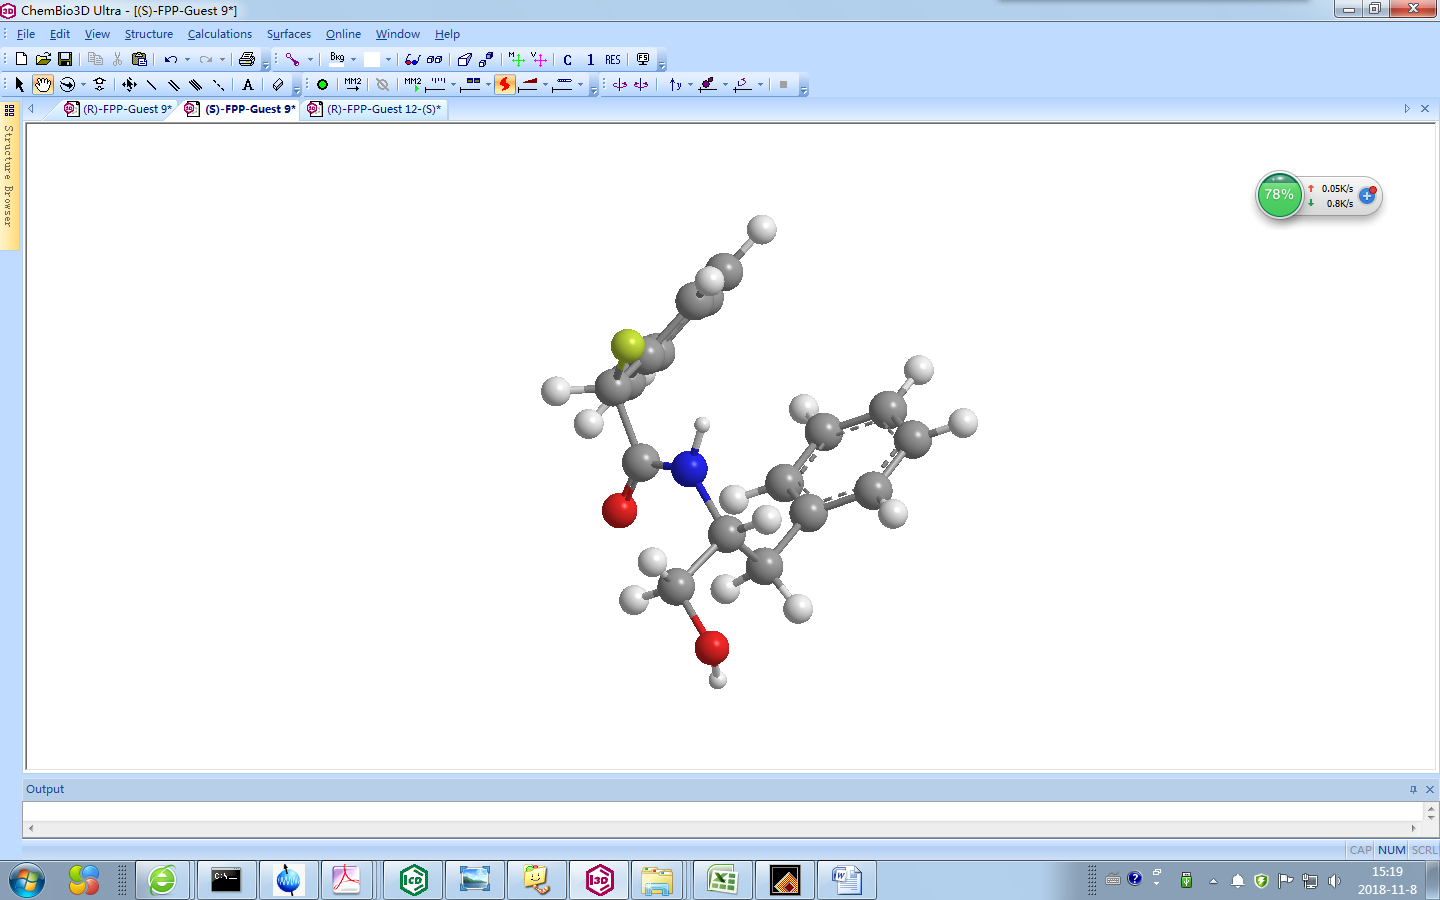
 δα-F*S* (calcd.) = -188.41 ppm

C -3.58168 0.40961 0.86484

C -4.08055 0.4231 -0.42898

C -3.50732 -0.39271 -1.3981

C -2.44927 -1.22644 -1.06998

C -1.95403 -1.244 0.23103

C -2.51694 -0.41965 1.19646

C -0.79907 -2.15296 0.57415

C 0.4955 -1.65865 -0.07605

F -0.64145 -2.22322 1.94856

N 1.35267 -1.04645 0.75083

O 0.65938 -1.82014 -1.27418

C 2.59413 -0.40742 0.32577

C 3.61256 -1.47317 -0.08362

C 2.38062 0.63712 -0.78097

C 1.27838 1.60612 -0.45097

C 0.01995 1.47318 -1.03135

C -1.01305 2.33724 -0.69202

C -0.80002 3.34718 0.2363

C 0.45322 3.4907 0.81992

C 1.48314 2.62567 0.47716

O 4.87618 -0.90474 -0.36855

H -4.0197 1.04622 1.62269

H -4.91151 1.06781 -0.68475

H -3.8912 -0.38586 -2.41005

H -2.00176 -1.86563 -1.82071

H -2.13161 -0.43108 2.20677

H -0.97711 -3.16518 0.2085

H 1.08666 -0.98017 1.72021

H 2.97977 0.10617 1.20858

H 3.7556 -2.16353 0.74817

H 3.22441 -2.03615 -0.93601

H 3.3231 1.17529 -0.89893

H 2.15831 0.12563 -1.71781

H -0.15214 0.6788 -1.74882

H -1.98632 2.21208 -1.1487

H -1.60429 4.02102 0.5026

H 0.62957 4.28037 1.53937

H 2.46141 2.74545 0.93037

H 4.87656 -0.57533 -1.27205

**Ball-cylinder model for (*R*)-FPA-amide 10 and cartesian coordinates (Gaussian 09).**

**
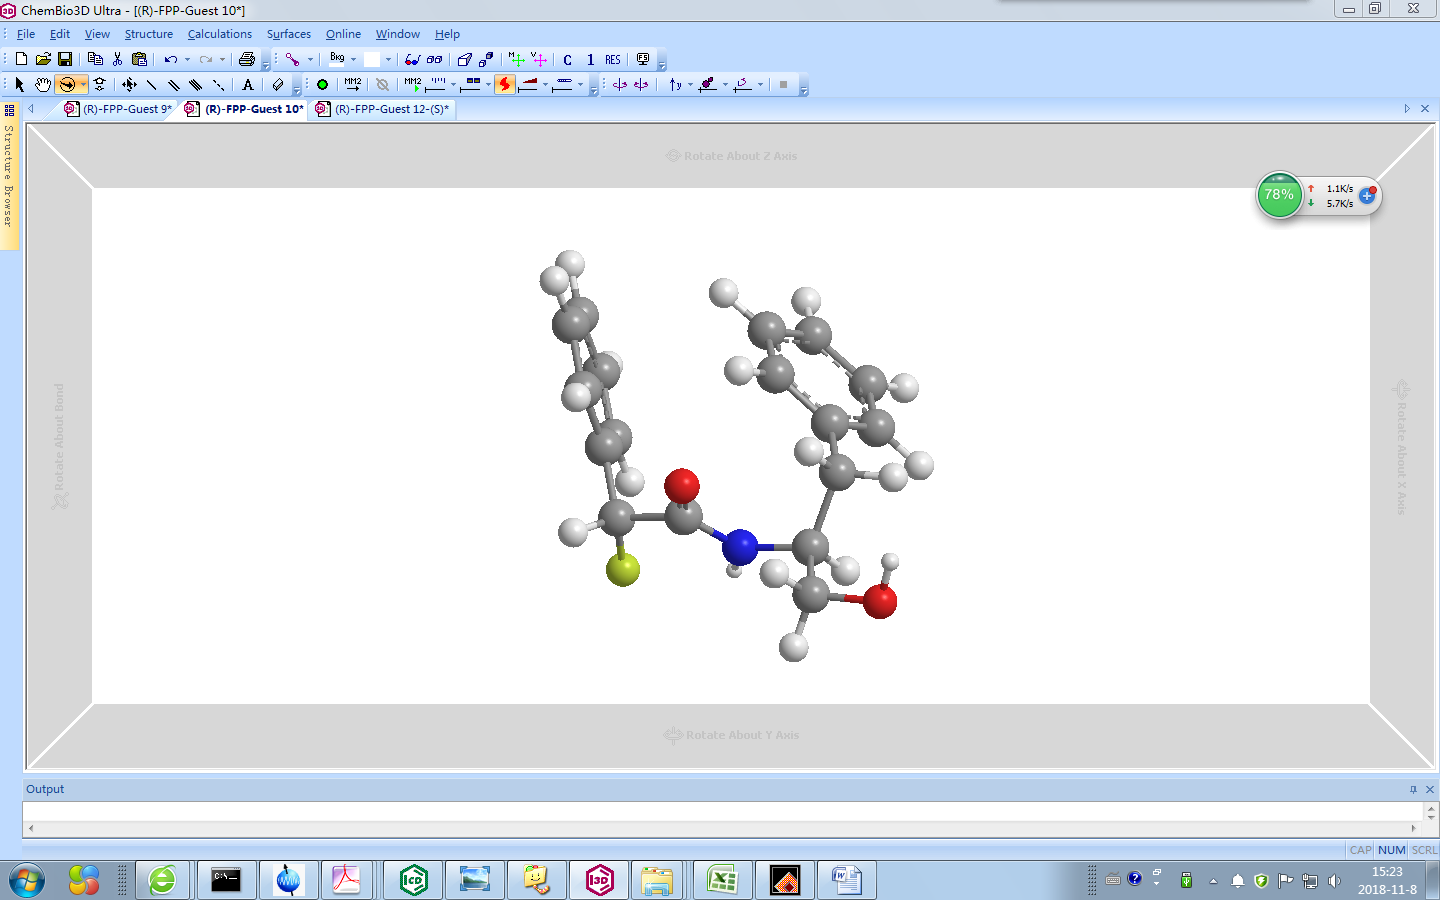
** δα-F*R* (calcd.) = -188.41 ppm

C -3.581680 0.409610 -0.864840

C -4.080550 0.423100 0.428980

C -3.507320 -0.392710 1.398100

C -2.449270 -1.226440 1.069980

C -1.954030 -1.244000 -0.231030

C -2.516940 -0.419650 -1.196460

C -0.799070 -2.152960 -0.574150

C 0.495500 -1.658650 0.076050

F -0.641450 -2.223220 -1.948560

N 1.352670 -1.046450 -0.750830

O 0.659380 -1.820140 1.274180

C 2.594130 -0.407420 -0.325770

C 3.612560 -1.473170 0.083620

C 2.380620 0.637120 0.780970

C 1.278380 1.606120 0.450970

C 0.019950 1.473180 1.031350

C -1.013050 2.337240 0.692020

C -0.800020 3.347180 -0.236300

C 0.453220 3.490700 -0.819920

C 1.483140 2.625670 -0.477160

O 4.876180 -0.904740 0.368550

H -4.019700 1.046220 -1.622690

H -4.911510 1.067810 0.684750

H -3.891200 -0.385860 2.410050

H -2.001760 -1.865630 1.820710

H -2.131610 -0.431080 -2.206770

H -0.977110 -3.165180 -0.208500

H 1.086660 -0.980170 -1.720210

H 2.979770 0.106170 -1.208580

H 3.755600 -2.163530 -0.748170

H 3.224410 -2.036150 0.936010

H 3.323100 1.175290 0.898930

H 2.158310 0.125630 1.717810

H -0.152140 0.678800 1.748820

H -1.986320 2.212080 1.148700

H -1.604290 4.021020 -0.502600

H 0.629570 4.280370 -1.539370

H 2.461410 2.745450 -0.930370

H 4.876560 -0.575330 1.272050

**Ball-cylinder model for (*S*)-FPA-amide 10 and cartesian coordinates (Gaussian 09).**


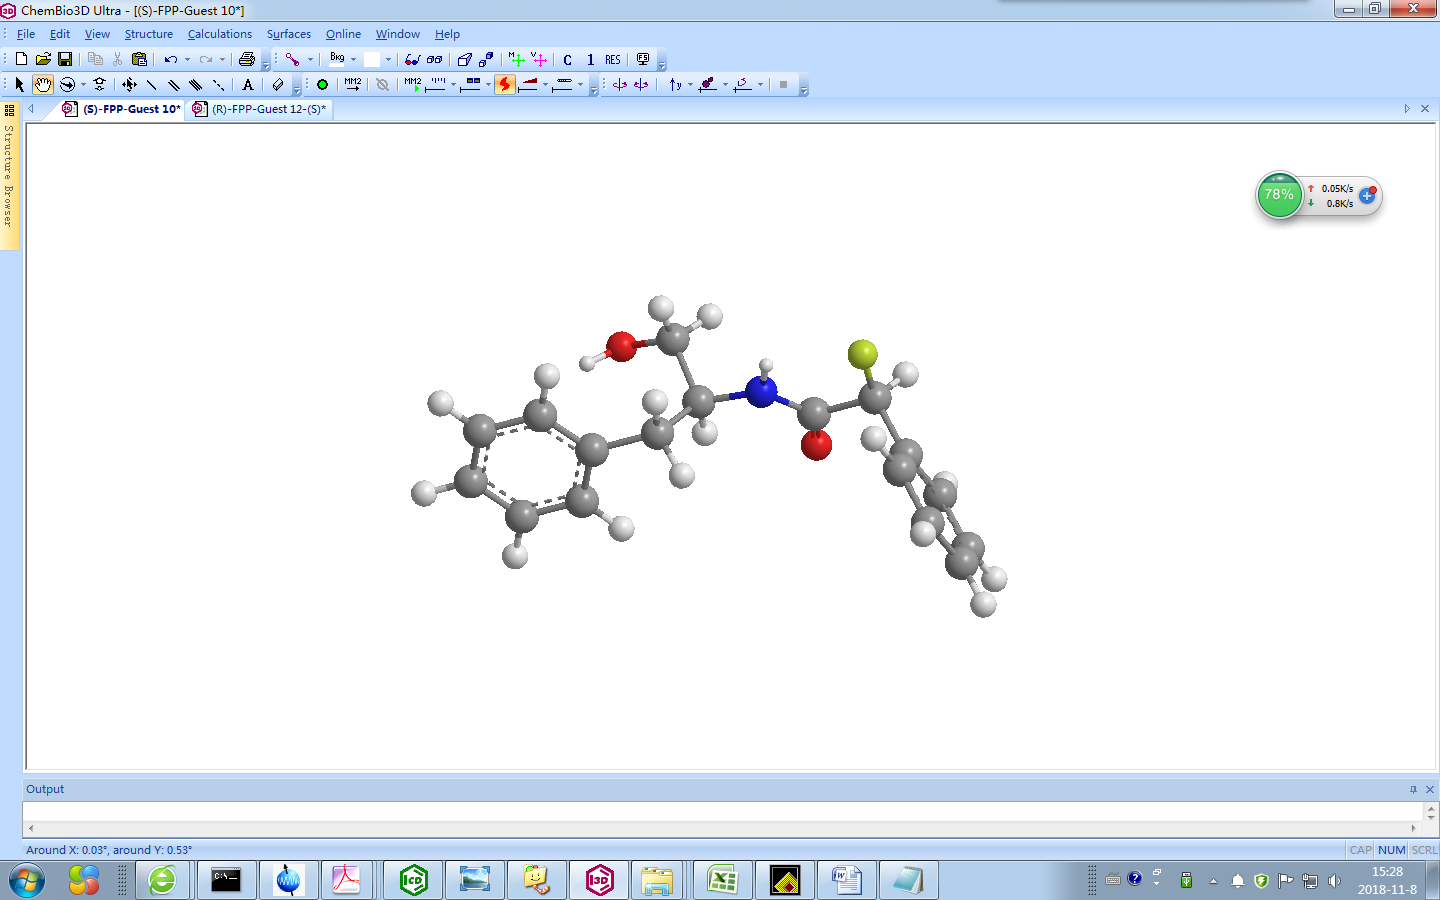
 δα-F*S* (calcd.) = -191.64 ppm

C -2.034993 -3.949075 -3.295647

C -2.281753 -4.820615 -2.235357

C -1.416083 -4.842805 -1.143917

C -0.310113 -3.995455 -1.107577

C -0.061023 -3.123775 -2.169567

C -0.927443 -3.105725 -3.266097

C 1.123907 -2.185075 -2.131757

C 0.712087 -0.752575 -1.740787

F 2.091437 -2.668215 -1.229247

N 1.181457 -0.325865 -0.548887

O 0.003637 -0.106235 -2.498587

C 0.908037 1.001295 -0.000097

C 2.203077 1.839115 -0.009037

C 0.260087 0.840655 1.396193

C -0.156723 2.132995 2.067343

C 0.573867 2.661315 3.139013

C 0.190517 3.857815 3.748063

C -0.934673 4.542055 3.296123

C -1.675693 4.021885 2.234113

C -1.290223 2.830185 1.627523

O 1.972997 3.234035 0.131183

H -2.701663 -3.929465 -4.150217

H -3.141083 -5.480895 -2.262437

H -1.599213 -5.520785 -0.317977

H 0.366437 -4.019615 -0.262927

H -0.738233 -2.428245 -4.089987

H 1.606207 -2.123965 -3.109577

H 1.783377 -0.954295 -0.036147

H 0.203007 1.475505 -0.684517

H 2.686167 1.709195 -0.979007

H 2.894337 1.465235 0.761163

H 0.961927 0.304165 2.044473

H -0.615793 0.196445 1.276153

H 1.445367 2.128615 3.506443

H 0.769287 4.248495 4.577473

H -1.235883 5.469935 3.768563

H -2.556553 4.545305 1.879583

H -1.875453 2.433315 0.804413

H 1.615387 3.395135 1.011543

**Ball-cylinder model for (*R*)-FPA-amide 11 and cartesian coordinates (Gaussian 09).**

**
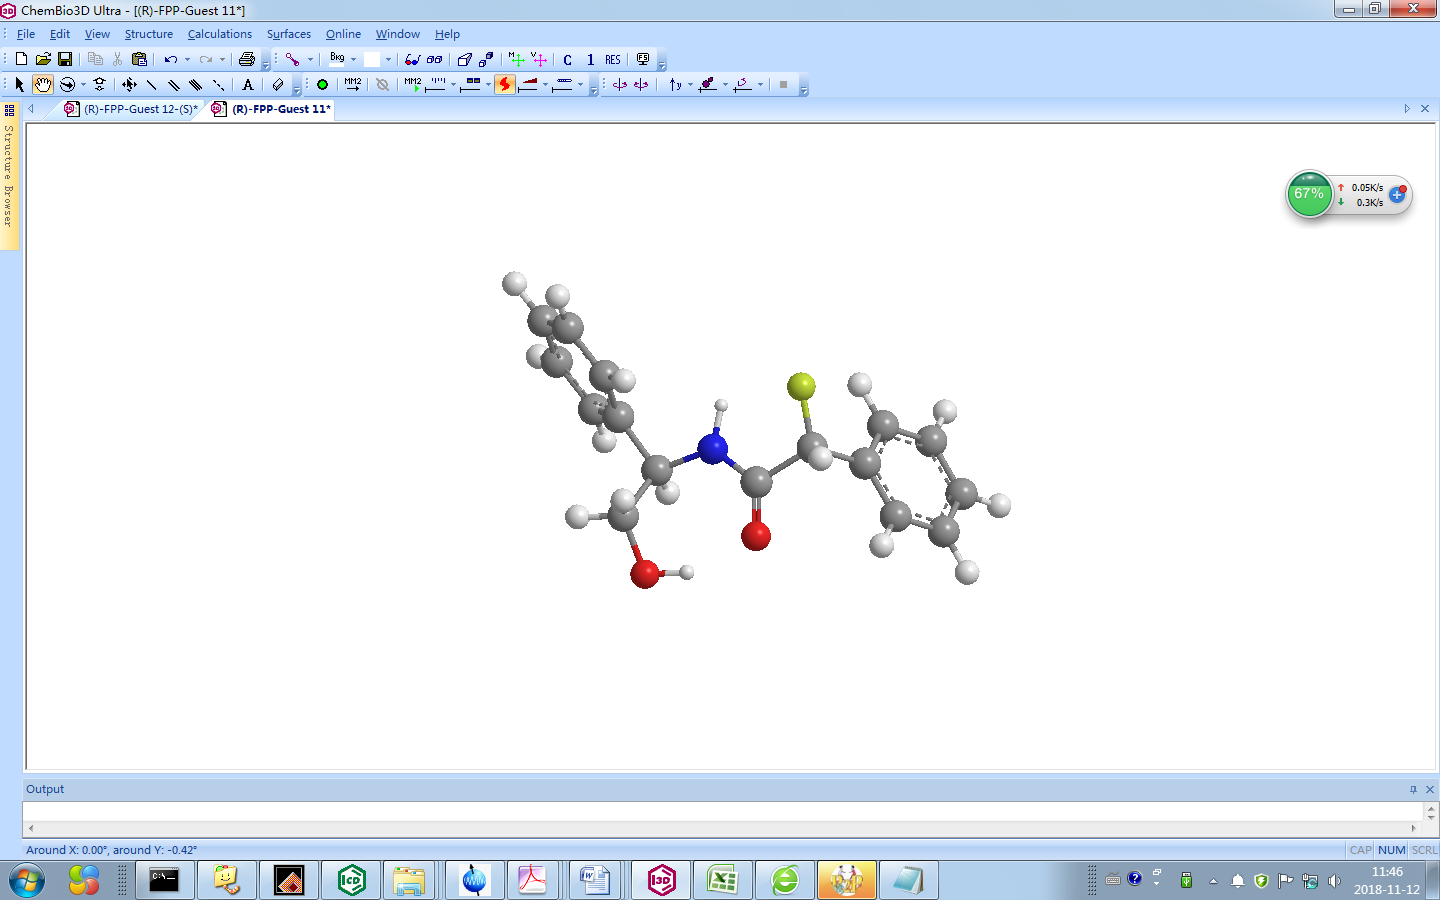
** δα-F*R* (calcd.) = -187.20 ppm

C 4.102762 -1.924683 0.977068

C 5.109066 -0.984596 1.187988

C 5.027108 0.265458 0.575401

C 3.945411 0.573577 -0.245262

C 2.932668 -0.366906 -0.452850

C 3.014852 -1.618015 0.161526

C 1.747248 -0.015345 -1.324960

C 0.731021 0.868294 -0.578721

F 1.117153 -1.187435 -1.779278

N -0.460496 0.300535 -0.341861

O 1.075062 2.007877 -0.265211

C -1.573146 0.849344 0.465340

C -1.955777 2.304901 0.092848

C -2.766639 -0.076889 0.324316

O -1.122744 3.279985 0.682656

C -3.427265 -0.548660 1.462225

C -4.554703 -1.359054 1.344094

C -5.034771 -1.710409 0.083812

C -4.381873 -1.246740 -1.057077

C -3.256314 -0.434107 -0.938348

H 4.162244 -2.900063 1.446412

H 5.954548 -1.225137 1.822283

H 5.808805 1.000089 0.731143

H 3.882340 1.546054 -0.718427

H 2.238579 -2.353039 -0.008455

H 2.062952 0.539539 -2.210870

H -0.561099 -0.655576 -0.653237

H -1.262583 0.873222 1.514813

H -1.992507 2.394564 -1.002765

H -2.962310 2.484312 0.475338

H -0.214132 3.059263 0.407142

H -3.055489 -0.281777 2.445827

H -5.053663 -1.719797 2.236359

H -5.909863 -2.343340 -0.008953

H -4.749121 -1.515581 -2.041012

H -2.756036 -0.079474 -1.833017

**Ball-cylinder model for (*S*)-FPA-amide 11 and cartesian coordinates (Gaussian 09).**


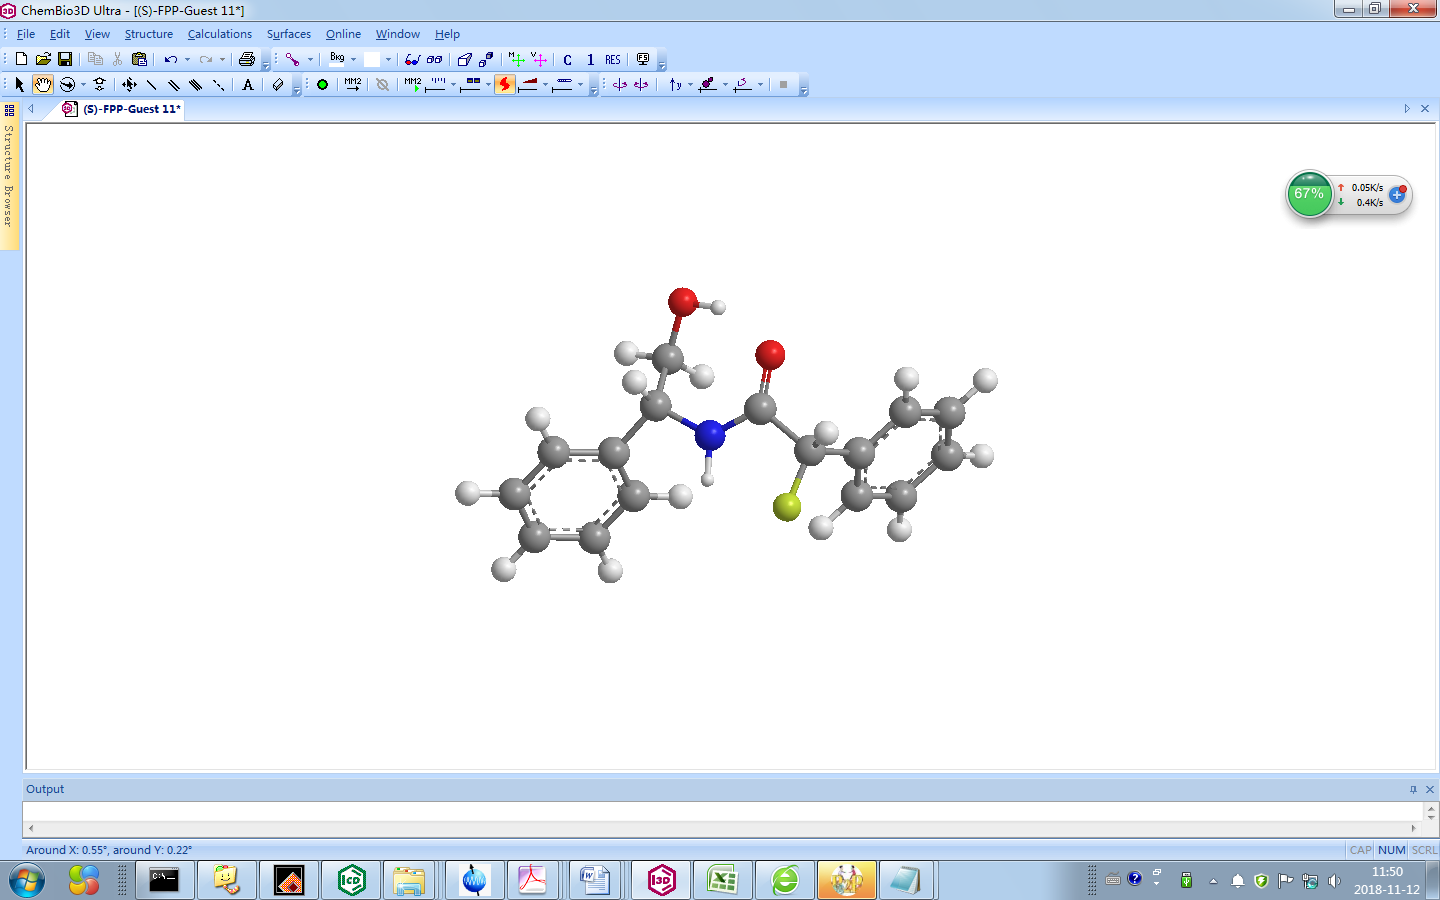
 δα-F*S* (calcd.) = -185.64 ppm

C 2.646382 1.670208 3.831396

C 3.618272 0.821258 3.318366

C 3.245132 -0.277462 2.555256

C 1.903672 -0.525112 2.299656

C 0.931372 0.324118 2.816406

C 1.303942 1.421118 3.583476

C -0.521658 0.087538 2.499636

C -0.904188 0.833108 1.220646

F -0.762318 -1.268972 2.346486

N -1.096358 0.069328 0.144416

O -0.970368 2.055528 1.258906

C -1.489698 0.534098 -1.191154

C -0.628268 1.703598 -1.708564

C -1.390328 -0.633592 -2.144014

O -1.069928 2.967658 -1.288784

C -2.426628 -0.903942 -3.030944

C -2.315798 -1.940092 -3.948324

C -1.165598 -2.716502 -3.986264

C -0.125878 -2.450982 -3.105054

C -0.236628 -1.413542 -2.189414

H 2.932872 2.524858 4.430236

H 4.664872 1.012778 3.516636

H 4.000032 -0.943422 2.157656

H 1.611102 -1.383862 1.708486

H 0.543382 2.081218 3.982016

H -1.166698 0.456868 3.297676

H -1.083148 -0.929062 0.293556

H -2.524078 0.887648 -1.155524

H 0.416832 1.516558 -1.428424

H -0.689668 1.698448 -2.797024

H -1.070548 2.949078 -0.317354

H -3.326308 -0.300542 -3.000324

H -3.131108 -2.143182 -4.630634

H -1.078828 -3.525702 -4.699684

H 0.774802 -3.050762 -3.131984

H 0.581372 -1.208282 -1.507454

**Ball-cylinder model for (*R*)-FPA-amide 12 and cartesian coordinates (Gaussian 09).**

**
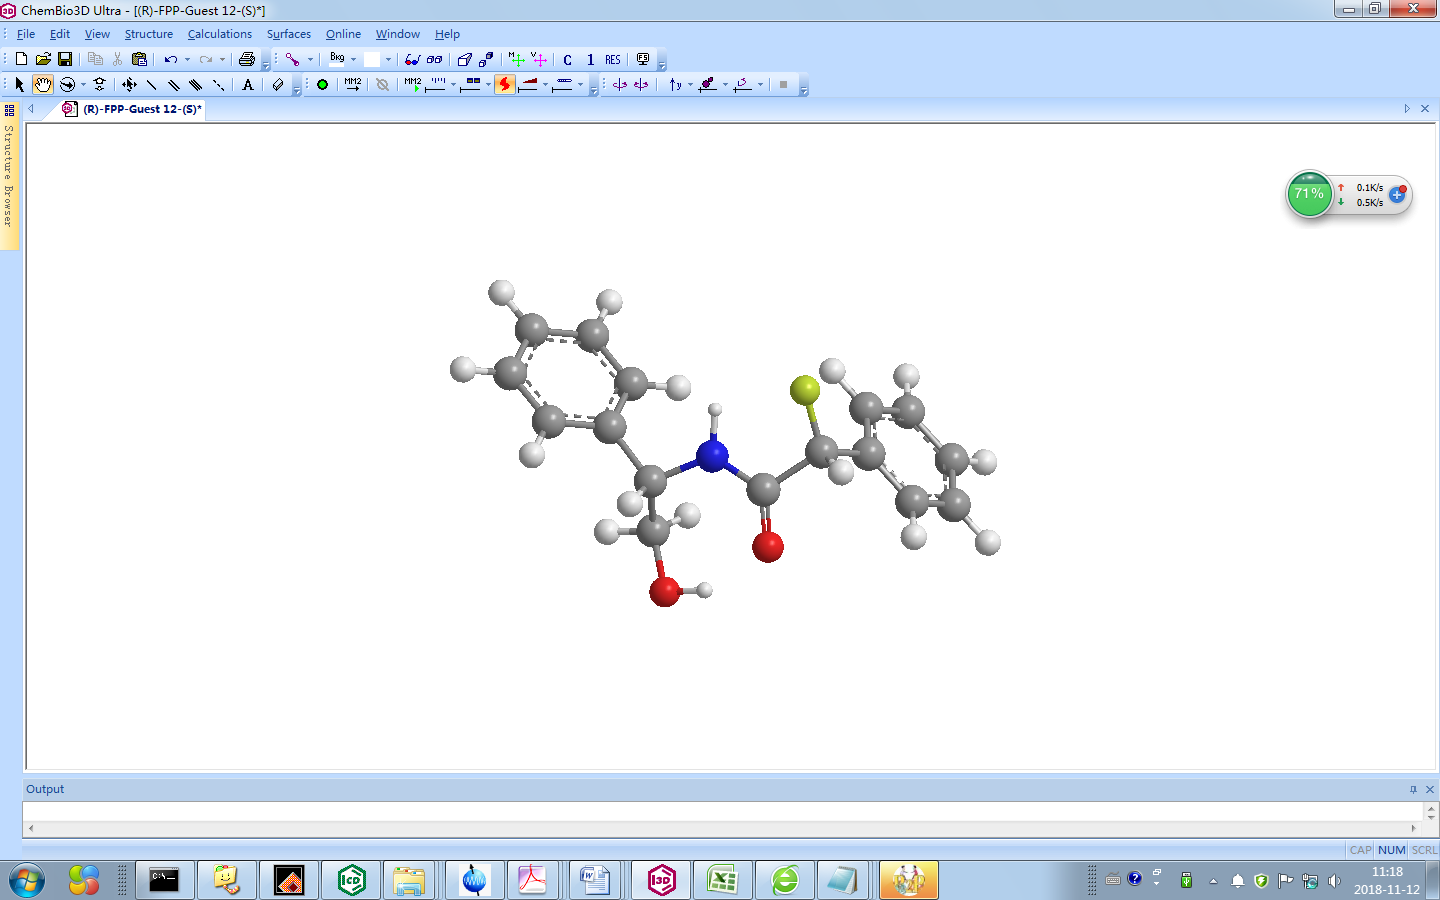
** δα-F*R* (calcd.) = -185.64 ppm

C 3.48922 1.09621 -3.33836

C 4.46111 0.24726 -2.82533

C 4.08797 -0.85146 -2.06222

C 2.74651 -1.09911 -1.80662

C 1.77421 -0.24988 -2.32337

C 2.14678 0.84712 -3.09044

C 0.32118 -0.48646 -2.0066

C -0.06135 0.25911 -0.72761

F 0.08052 -1.84297 -1.85345

N -0.25352 -0.50467 0.34862

O -0.12753 1.48153 -0.76587

C -0.64686 -0.0399 1.68419

C 0.21457 1.1296 2.2016

C -0.54749 -1.20759 2.63705

O -0.22709 2.39366 1.78182

C -1.58379 -1.47794 3.52398

C -1.47296 -2.51409 4.44136

C -0.32276 -3.2905 4.4793

C 0.71696 -3.02498 3.59809

C 0.60621 -1.98754 2.68245

H 3.77571 1.95086 -3.9372

H 5.50771 0.43878 -3.0236

H 4.84287 -1.51742 -1.66462

H 2.45394 -1.95786 -1.21545

H 1.38622 1.50722 -3.48898

H -0.32386 -0.11713 -2.80464

H -0.24031 -1.50306 0.19948

H -1.68124 0.31365 1.64856

H 1.25967 0.94256 1.92146

H 0.15317 1.12445 3.29006

H -0.22771 2.37508 0.81039

H -2.48347 -0.87454 3.49336

H -2.28827 -2.71718 5.12367

H -0.23599 -4.0997 5.19272

H 1.61764 -3.62476 3.62502

H 1.42421 -1.78228 2.00049

**Ball-cylinder model for (*S*)-FPA-amide 12 and cartesian coordinates (Gaussian 09).**


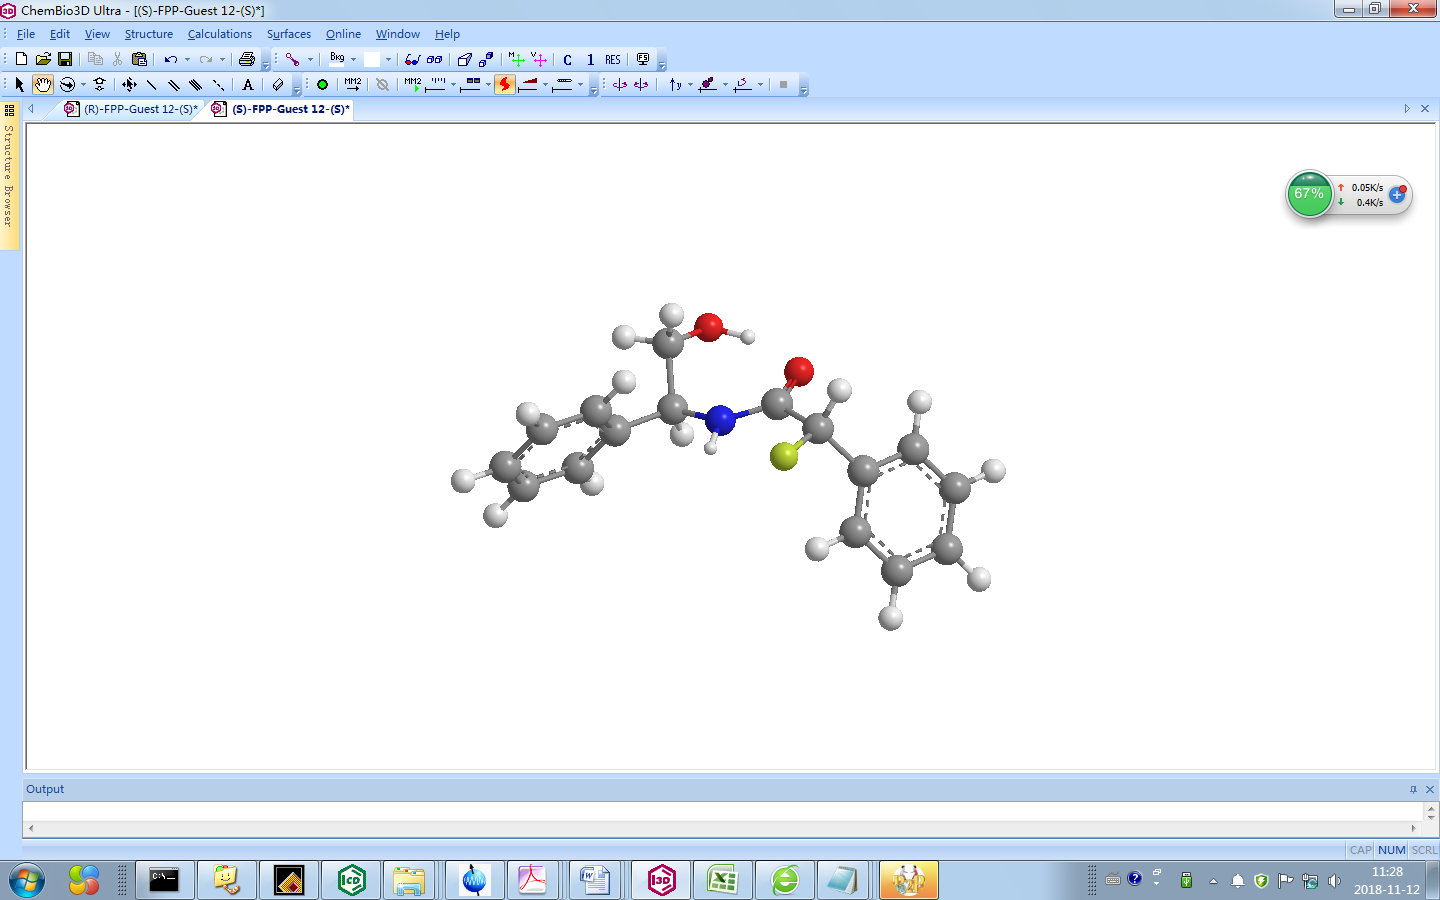
 δα-F*S* (calcd.) = -187.20 ppm

C 4.10276200 -1.92468300 -0.97706800

C 5.10906600 -0.98459600 -1.18798800

C 5.02710800 0.26545800 -0.57540100

C 3.94541100 0.57357700 0.24526200

C 2.93266800 -0.36690600 0.45285000

C 3.01485200 -1.61801500 -0.16152600

C 1.74724800 -0.01534500 1.32496000

C 0.73102100 0.86829400 0.57872100

F 1.11715300 -1.18743500 1.77927800

N -0.46049600 0.30053500 0.34186100

O 1.07506200 2.00787700 0.26521100

C -1.57314600 0.84934400 -0.46534000

C -1.95577700 2.30490100 -0.09284800

C -2.76663900 -0.07688900 -0.32431600

O -1.12274400 3.27998500 -0.68265600

C -3.42726500 -0.54866000 -1.46222500

C -4.55470300 -1.35905400 -1.34409400

C -5.03477100 -1.71040900 -0.08381200

C -4.38187300 -1.24674000 1.05707700

C -3.25631400 -0.43410700 0.93834800

H 4.16224400 -2.90006300 -1.44641200

H 5.95454800 -1.22513700 -1.82228300

H 5.80880500 1.00008900 -0.73114300

H 3.88234000 1.54605400 0.71842700

H 2.23857900 -2.35303900 0.00845500

H 2.06295200 0.53953900 2.21087000

H -0.56109900 -0.65557600 0.65323700

H -1.26258300 0.87322200 -1.51481300

H -1.99250700 2.39456400 1.00276500

H -2.96231000 2.48431200 -0.47533800

H -0.21413200 3.05926300 -0.40714200

H -3.05548900 -0.28177700 -2.44582700

H -5.05366300 -1.71979700 -2.23635900

H -5.90986300 -2.34334000 0.00895300

H -4.74912100 -1.51558100 2.04101200

H -2.75603600 -0.07947400 1.83301700

**Ball-cylinder model for (*R*)-FPA-amide 13 and cartesian coordinates (Gaussian 09).**

**
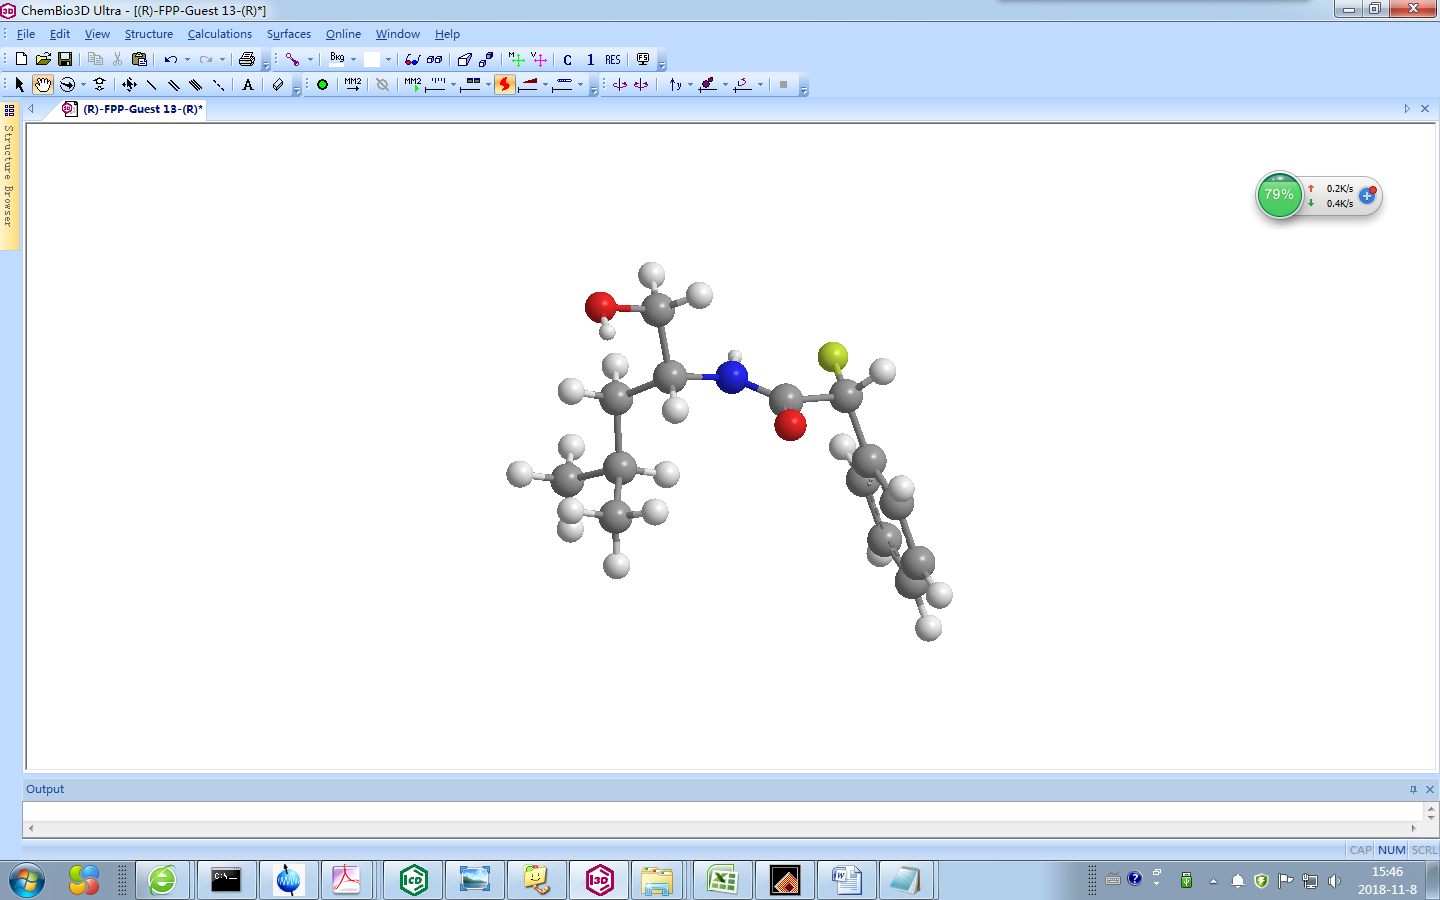
** δα-F*R* (calcd.) = -194.67 ppm

C 2.91589 0.82756 -3.74538

C 4.24512 1.01582 -3.36669

C 4.77421 0.27036 -2.31608

C 3.98077 -0.65794 -1.64273

C 2.65053 -0.84717 -2.02138

C 2.1212 -0.10112 -3.07932

C 1.77539 -1.84821 -1.29685

C 0.68758 -1.16448 -0.4474

F 2.56669 -2.67825 -0.48112

N 0.83175 -1.29434 0.88673

O -0.21385 -0.55374 -1.00673

C -0.1033 -0.72816 1.8596

C -1.06265 -1.82923 2.35258

C 0.64483 -0.05469 3.01496

C 1.49354 1.17517 2.64349

O -2.06324 -1.32819 3.23268

C 0.64309 2.32628 2.08703

C 2.30357 1.63957 3.8621

H 2.49726 1.40149 -4.56429

H 4.86362 1.73619 -3.88981

H 5.80727 0.40758 -2.01713

H 4.39691 -1.24234 -0.83258

H 1.08726 -0.24074 -3.3695

H 1.26272 -2.50205 -2.00605

H 1.60171 -1.8574 1.21967

H -0.69571 0.00652 1.30964

H -1.5093 -2.32746 1.48397

H -0.50576 -2.57873 2.92201

H -0.10077 0.22834 3.76492

H 1.28931 -0.80608 3.49099

H 2.20424 0.87407 1.86397

H -2.65839 -0.77186 2.71849

H 1.26853 3.19547 1.86467

H 0.12878 2.0504 1.16326

H -0.11369 2.63818 2.81567

H 2.94037 2.49226 3.60999

H 2.94721 0.84045 4.24193

H 1.63956 1.94843 4.67693

**Ball-cylinder model for (*S*)-FPA-amide 13 and cartesian coordinates (Gaussian 09).**


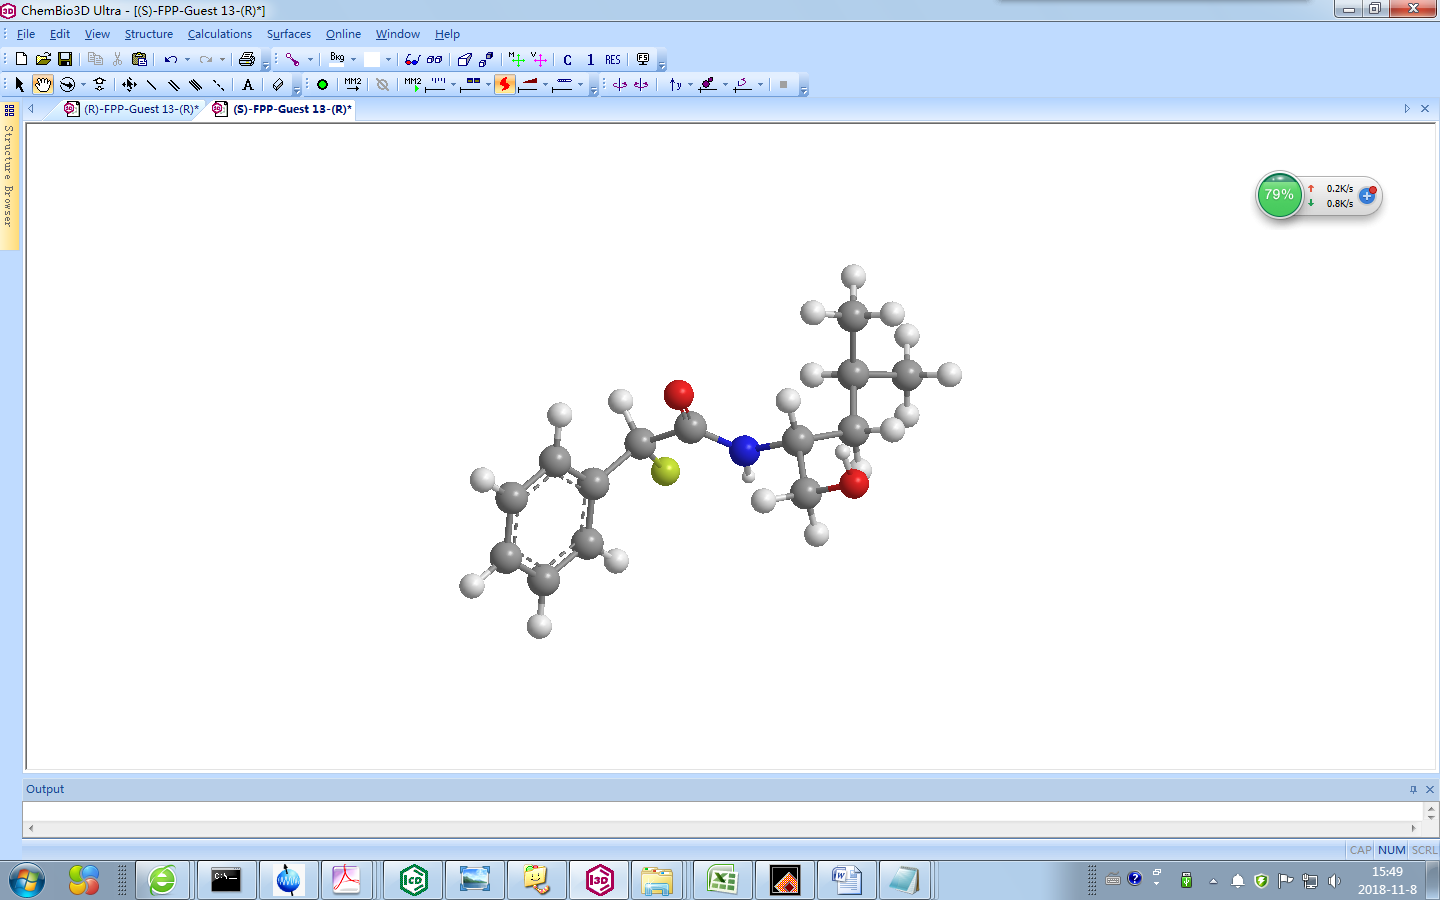
 δα-F*S* (calcd.) = -194.01 ppm

C 5.165 -1.15718 -2.69791

C 4.74651 -2.47942 -2.82382

C 3.39947 -2.79632 -2.64815

C 2.47679 -1.7977 -2.34987

C 2.89715 -0.47011 -2.2184

C 4.24516 -0.1538 -2.39474

C 1.88729 0.60788 -1.88321

C 1.34012 0.46938 -0.45044

F 2.46625 1.87947 -2.05189

N 1.70445 1.44683 0.40301

O 0.62523 -0.48414 -0.17021

C 1.28538 1.49235 1.80447

C 2.38691 0.88428 2.69488

C 0.9316 2.92329 2.2214

C -0.28547 3.5498 1.51578

O 1.99614 0.80282 4.06185

C -1.59312 2.81432 1.84289

C -0.396 5.037 1.88083

H 6.20938 -0.90121 -2.83649

H 5.46277 -3.25796 -3.06043

H 3.06467 -3.82262 -2.74756

H 1.43277 -2.04573 -2.20488

H 4.57172 0.87397 -2.30562

H 1.02928 0.56134 -2.55771

H 2.28734 2.18898 0.04266

H 0.40863 0.84457 1.87783

H 2.66194 -0.1006 2.29998

H 3.27704 1.51895 2.66944

H 0.76533 2.91645 3.30321

H 1.8121 3.55745 2.0506

H -0.12138 3.48293 0.4329

H 1.30797 0.13235 4.13328

H -2.44104 3.29443 1.34622

H -1.57386 1.77087 1.51897

H -1.78679 2.82915 2.92121

H -1.23652 5.50855 1.36369

H 0.51294 5.58295 1.61108

H -0.55381 5.16348 2.95752

**Ball-cylinder model for (*R*)-FPA-amide 14 and cartesian coordinates (Gaussian 09).**

**
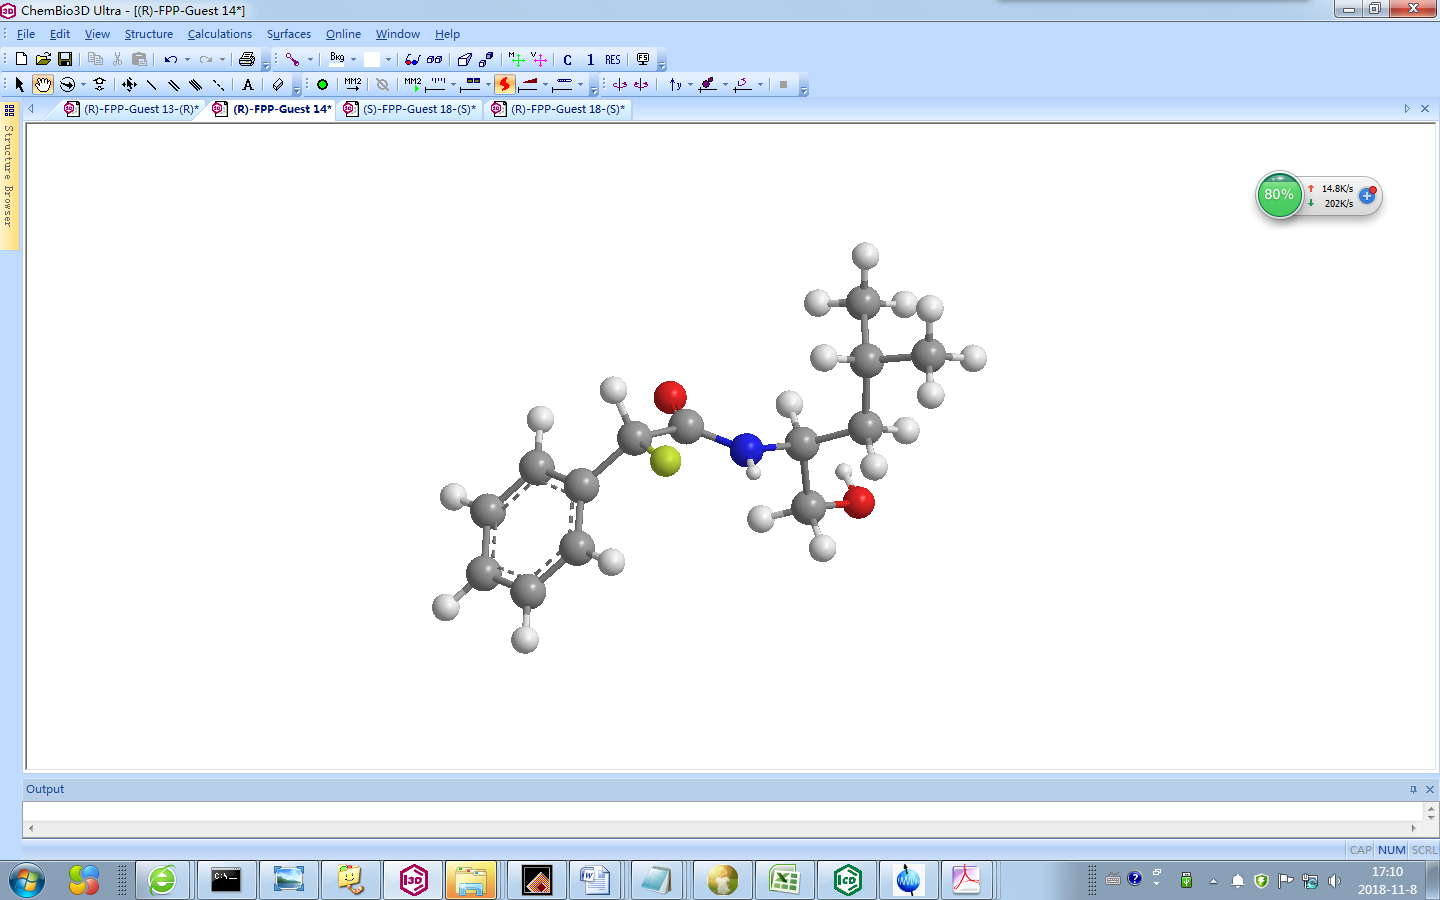
** δα-F*R* (calcd.) = -194.01 ppm

C 3.523702 -2.279997 2.949288

C 3.105212 -3.602237 3.075198

C 1.758172 -3.919137 2.899528

C 0.835492 -2.920517 2.601248

C 1.255852 -1.592927 2.469778

C 2.603862 -1.276617 2.646118

C 0.245992 -0.514937 2.134588

C -0.301178 -0.653437 0.701818

F 0.824952 0.756653 2.303268

N 0.063152 0.324013 -0.151632

O -1.016068 -1.606957 0.421588

C -0.355918 0.369533 -1.553092

C 0.745612 -0.238537 -2.443502

C -0.709698 1.800473 -1.970022

C -1.926768 2.426983 -1.264402

O 0.354842 -0.319997 -3.810472

C -3.234418 1.691503 -1.591512

C -2.037298 3.914183 -1.629452

H 4.568082 -2.024027 3.087868

H 3.821472 -4.380777 3.311808

H 1.423372 -4.945437 2.998938

H -0.208528 -3.168547 2.456258

H 2.930422 -0.248847 2.556998

H -0.612018 -0.561477 2.809088

H 0.646042 1.066163 0.208718

H -1.232668 -0.278247 -1.626452

H 1.020642 -1.223417 -2.048602

H 1.635742 0.396133 -2.418062

H -0.875968 1.793633 -3.051832

H 0.170802 2.434633 -1.799222

H -1.762678 2.360113 -0.181522

H -0.333328 -0.990467 -3.881902

H -4.082338 2.171613 -1.094842

H -3.215158 0.648053 -1.267592

H -3.428088 1.706333 -2.669832

H -2.877818 4.385733 -1.112312

H -1.128358 4.460133 -1.359702

H -2.195108 4.040663 -2.706142

**Ball-cylinder model for (*S*)-FPA-amide 14 and cartesian coordinates (Gaussian 09).**


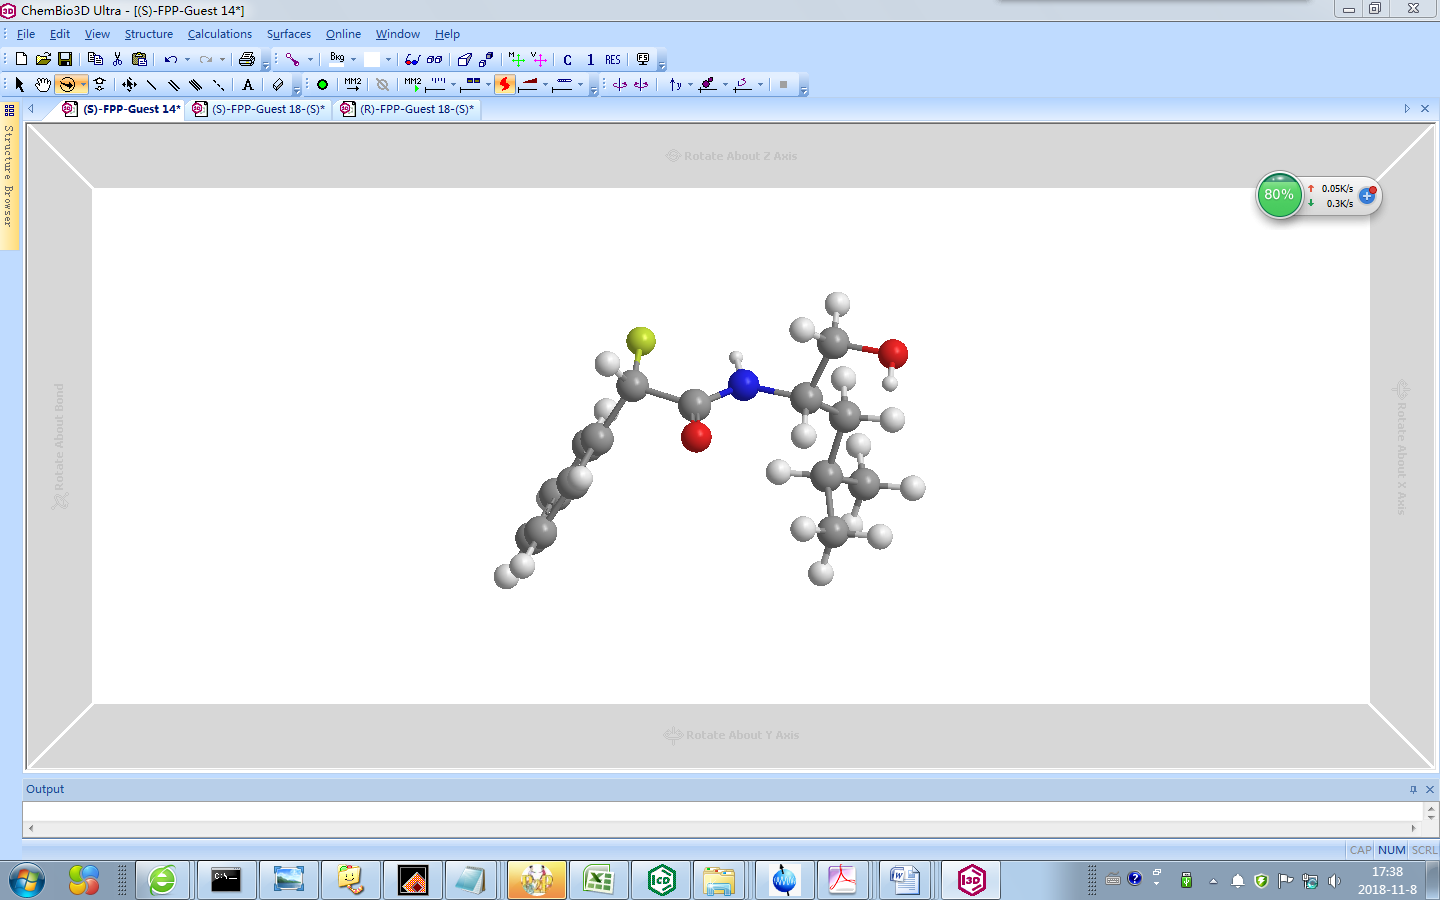
 δα-F*S* (calcd.) = -194.67 ppm

C 1.427936 0.836456 4.298071

C 2.757166 1.024716 3.919381

C 3.286256 0.279256 2.868771

C 2.492816 -0.649044 2.195421

C 1.162576 -0.838274 2.574071

C 0.633246 -0.092224 3.632011

C 0.287436 -1.839314 1.849541

C -0.800374 -1.155584 1.000091

F 1.078736 -2.669354 1.033811

N -0.656204 -1.285444 -0.334039

O -1.701804 -0.544844 1.559421

C -1.591254 -0.719264 -1.306909

C -2.550604 -1.820334 -1.799889

C -0.843124 -0.045794 -2.462269

C 0.005586 1.184066 -2.090799

O -3.551194 -1.319294 -2.679989

C -0.844864 2.335176 -1.534339

C 0.815616 1.648466 -3.309409

H 1.009306 1.410386 5.116981

H 3.375666 1.745086 4.442501

H 4.319316 0.416476 2.569821

H 2.908956 -1.233444 1.385271

H -0.400694 -0.231844 3.922191

H -0.225234 -2.493154 2.558741

H 0.113756 -1.848504 -0.666979

H -2.183664 0.015416 -0.756949

H -2.997254 -2.318564 -0.931279

H -1.993714 -2.569834 -2.369319

H -1.588724 0.237236 -3.212229

H -0.198644 -0.797184 -2.938299

H 0.716286 0.882966 -1.311279

H -4.146344 -0.762964 -2.165799

H -0.219424 3.204366 -1.311979

H -1.359174 2.059296 -0.610569

H -1.601644 2.647076 -2.262979

H 1.452416 2.501156 -3.057299

H 1.459256 0.849346 -3.689239

H 0.151606 1.957326 -4.124239

**Ball-cylinder model for (*R*)-FPA-amide 15 and cartesian coordinates (Gaussian 09).**

**
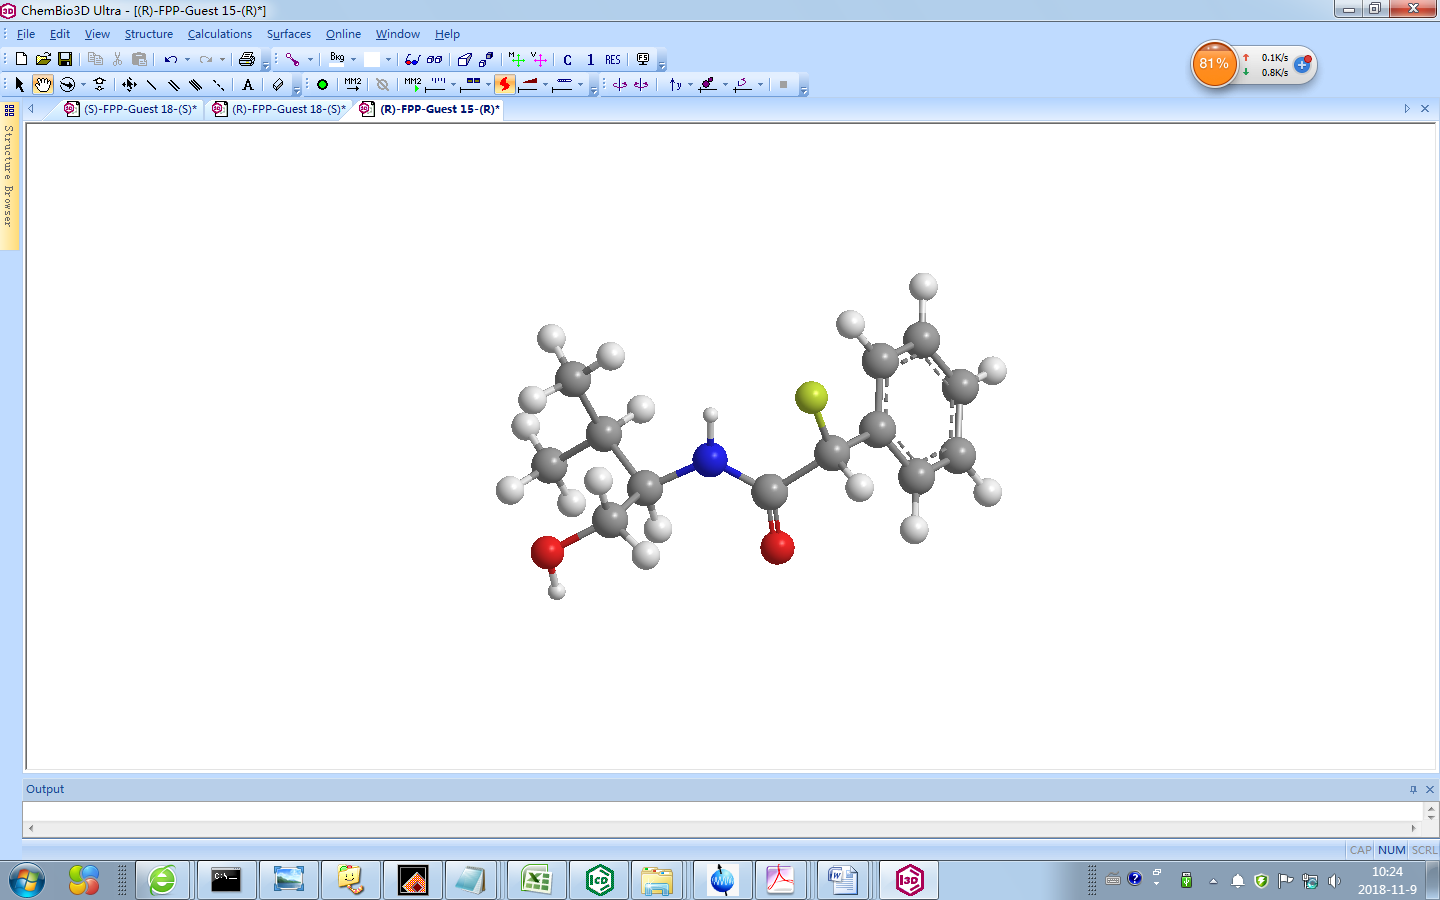
** δα-F*R* (calcd.) = -194.34 ppm

C 4.67178 -0.16082 -2.34577

C 4.90725 -1.5355 -2.32888

C 3.83524 -2.41725 -2.2142

C 2.53229 -1.93106 -2.11281

C 2.29576 -0.55536 -2.13022

C 3.37225 0.32894 -2.25028

C 0.88929 -0.00983 -2.00646

C 0.63717 0.62637 -0.6263

F -0.04779 -1.03358 -2.23981

N -0.21915 -0.04523 0.16926

O 1.21586 1.66367 -0.33116

C -0.57817 0.3952 1.52118

C -1.93753 1.11966 1.44001

C -0.48834 -0.79598 2.51084

C -0.34078 -0.33521 3.96902

O -2.38265 1.66122 2.67925

C -1.64519 -1.79573 2.36428

H 5.50053 0.53189 -2.43828

H 5.91936 -1.91555 -2.40843

H 4.00931 -3.4873 -2.20418

H 1.70022 -2.61844 -2.03231

H 3.19089 1.39666 -2.25673

H 0.70303 0.7636 -2.75467

H -0.66123 -0.8676 -0.21504

H 0.18349 1.12952 1.79705

H -1.86033 1.90071 0.67397

H -2.71513 0.42243 1.12052

H 0.43884 -1.31507 2.24014

H -0.16269 -1.19606 4.61975

H 0.50666 0.34779 4.08139

H -1.23967 0.17705 4.31365

H -1.77605 2.36545 2.93279

H -1.45465 -2.68406 2.97195

H -1.77878 -2.13464 1.33192

H -2.59077 -1.36204 2.7002

**Ball-cylinder model for (*S*)-FPA-amide 15 and cartesian coordinates (Gaussian 09).**


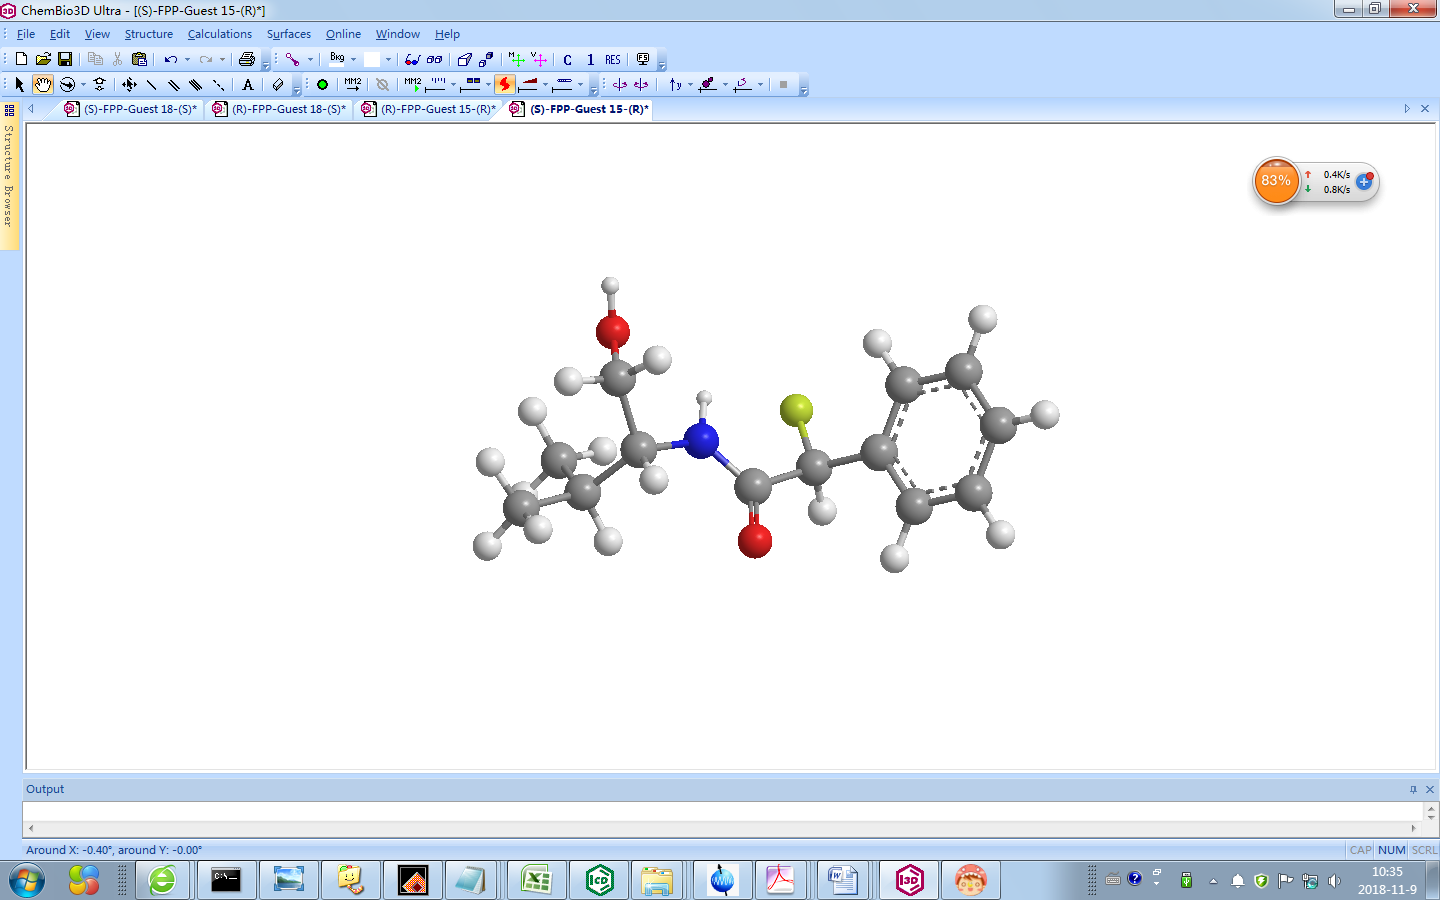
 δα-F*S* (calcd.) = -193.45 ppm

C 4.04522 -1.82656 -2.58484

C 3.57385 -2.4072 -3.75979

C 2.22049 -2.3094 -4.08306

C 1.3445 -1.63451 -3.23754

C 1.81591 -1.05537 -2.05498

C 3.17055 -1.15349 -1.73256

C 0.85166 -0.3384 -1.1342

C -0.10022 -1.31412 -0.41594

F 1.56322 0.42016 -0.18646

N 0.07731 -1.41432 0.9121

O -0.93503 -1.92898 -1.06918

C -0.71849 -2.2904 1.77111

C 0.20991 -2.83983 2.85542

C -2.02402 -1.59766 2.251

C -2.92769 -2.57657 3.01309

O 0.87468 -1.74434 3.49369

C -1.80007 -0.30629 3.0495

H 5.09641 -1.89446 -2.32802

H 4.25551 -2.92918 -4.42169

H 1.84604 -2.75543 -4.99748

H 0.29242 -1.56598 -3.48483

H 3.54061 -0.69588 -0.82434

H 0.22841 0.36333 -1.69326

H 0.78531 -0.84779 1.35729

H -1.02487 -3.13829 1.15188

H -0.36483 -3.42832 3.57847

H 0.942 -3.50218 2.37919

H -2.545 -1.32911 1.32448

H -3.91408 -2.13363 3.17396

H -3.06891 -3.50989 2.45929

H -2.5184 -2.82466 3.99704

H 1.60007 -2.09657 4.01833

H -1.29476 -0.50425 3.99667

H -2.76023 0.17247 3.26322

H -1.19121 0.40787 2.48961

**Ball-cylinder model for (*R*)-FPA-amide 16 and cartesian coordinates (Gaussian 09).**

**
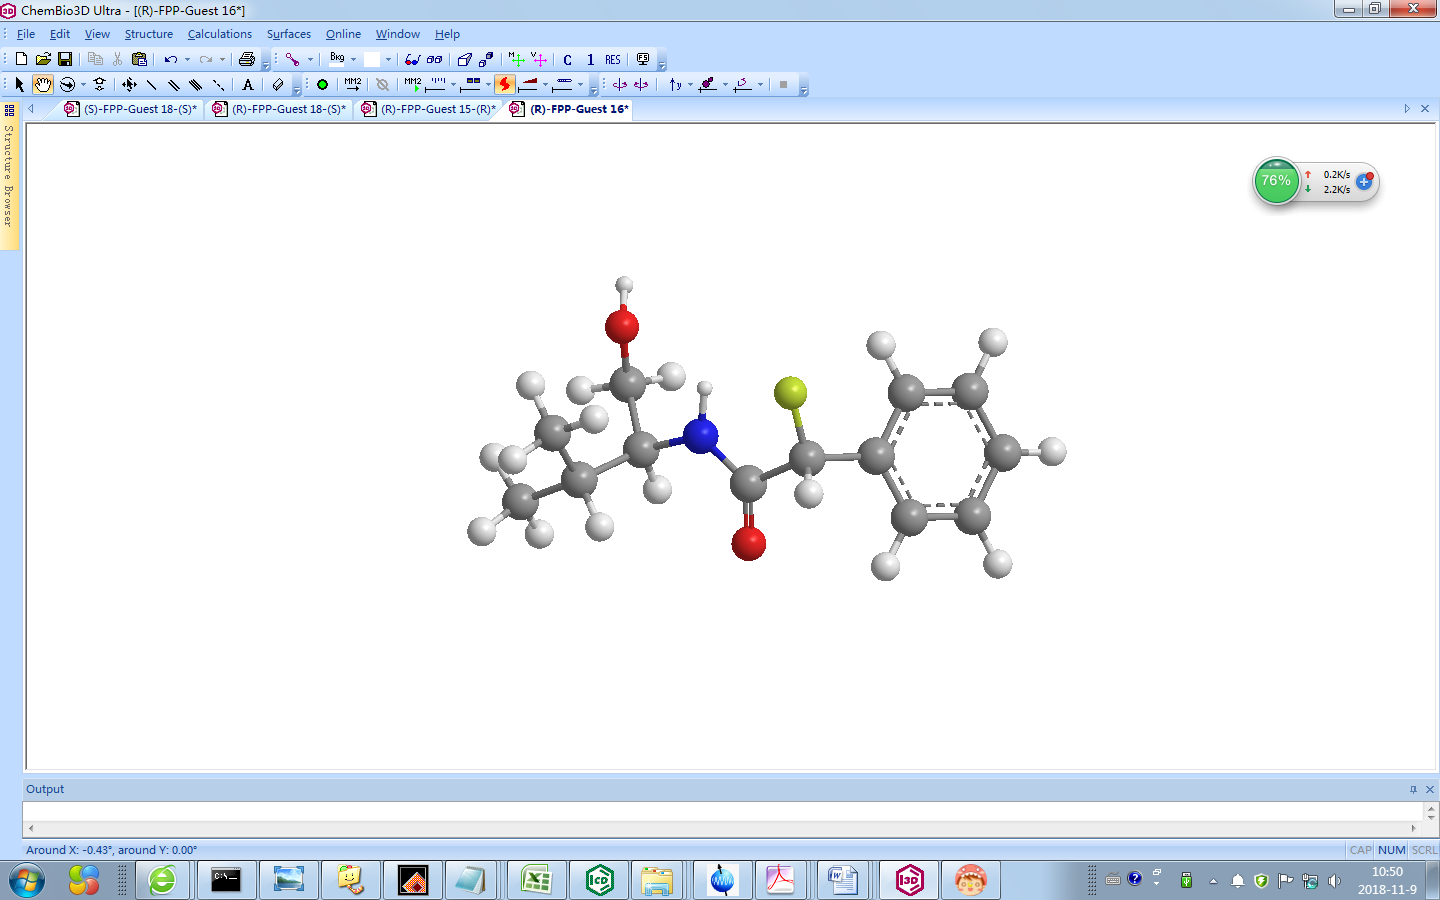
** δα-F*R* (calcd.) = -193.45 ppm

C 4.045220 -1.826560 2.584840

C 3.573850 -2.407200 3.759790

C 2.220490 -2.309400 4.083060

C 1.344500 -1.634510 3.237540

C 1.815910 -1.055370 2.054980

C 3.170550 -1.153490 1.732560

C 0.851660 -0.338400 1.134200

C -0.100220 -1.314120 0.415940

F 1.563220 0.420160 0.186460

N 0.077310 -1.414320 -0.912100

O -0.935030 -1.928980 1.069180

C -0.718490 -2.290400 -1.771110

C 0.209910 -2.839830 -2.855420

C -2.024020 -1.597660 -2.251000

C -2.927690 -2.576570 -3.013090

O 0.874680 -1.744340 -3.493690

C -1.800070 -0.306290 -3.049500

H 5.096410 -1.894460 2.328020

H 4.255510 -2.929180 4.421690

H 1.846040 -2.755430 4.997480

H 0.292420 -1.565980 3.484830

H 3.540610 -0.695880 0.824340

H 0.228410 0.363330 1.693260

H 0.785310 -0.847790 -1.357290

H -1.024870 -3.138290 -1.151880

H -0.364830 -3.428320 -3.578470

H 0.942000 -3.502180 -2.379190

H -2.545000 -1.329110 -1.324480

H -3.914080 -2.133630 -3.173960

H -3.068910 -3.509890 -2.459290

H -2.518400 -2.824660 -3.997040

H 1.600070 -2.096570 -4.018330

H -1.294760 -0.504250 -3.996670

H -2.760230 0.172470 -3.263220

H -1.191210 0.407870 -2.489610

**Ball-cylinder model for (*S*)-FPA-amide 16 and cartesian coordinates (Gaussian 09).**


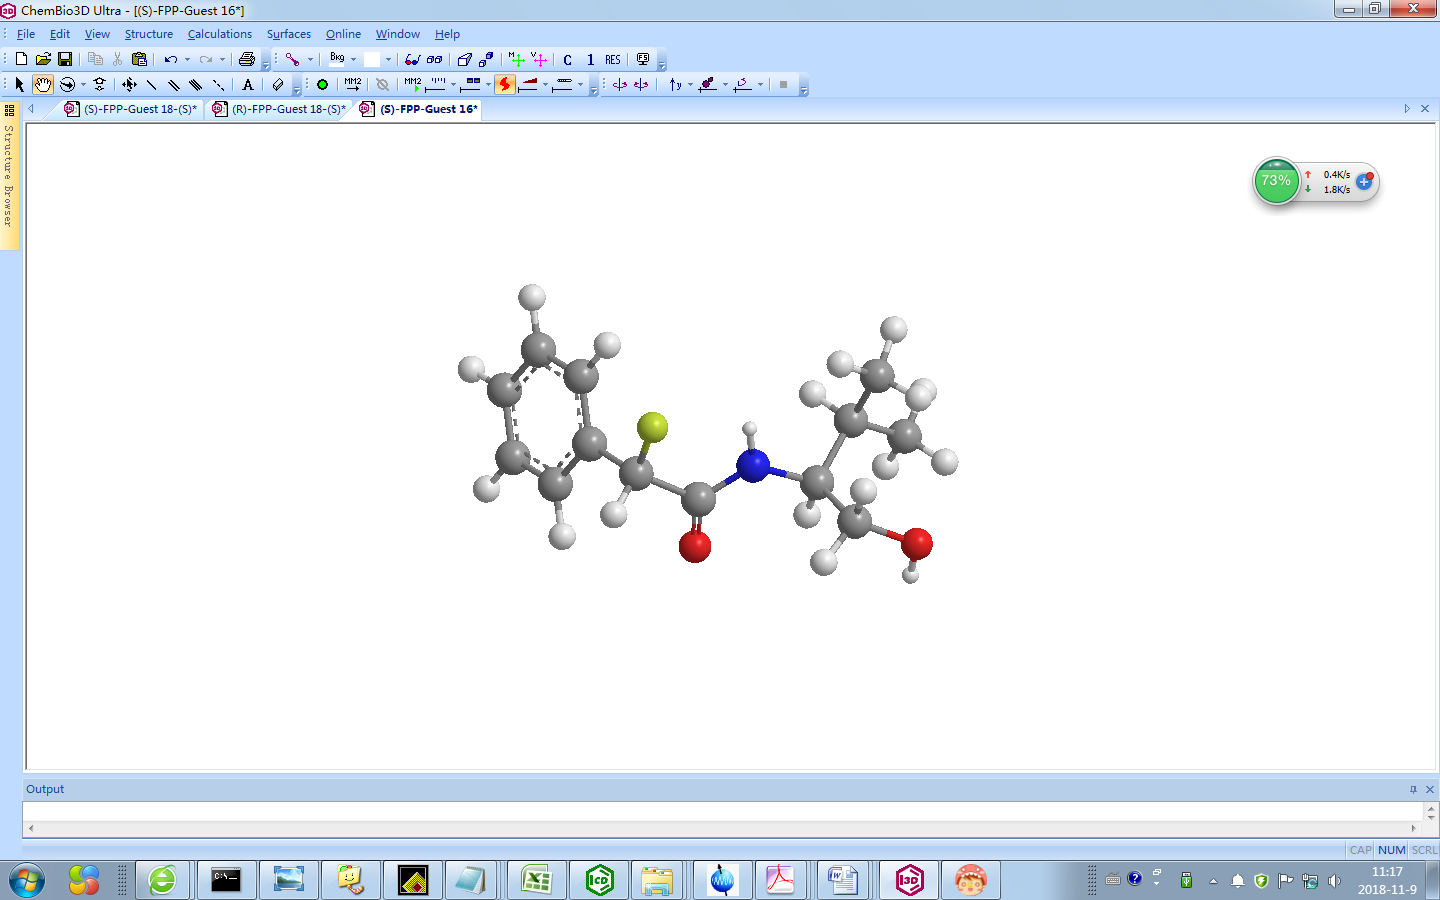
 δα-F*S* (calcd.) = -194.34 ppm

C 3.968057 0.221070 2.646960

C 4.203527 -1.153610 2.630070

C 3.131517 -2.035360 2.515390

C 1.828567 -1.549170 2.414000

C 1.592037 -0.173470 2.431410

C 2.668527 0.710830 2.551470

C 0.185567 0.372060 2.307650

C -0.066553 1.008260 0.927490

F -0.751513 -0.651690 2.541000

N -0.922873 0.336660 0.131930

O 0.512137 2.045560 0.632350

C -1.281893 0.777090 -1.219990

C -2.641253 1.501550 -1.138820

C -1.192063 -0.414090 -2.209650

C -1.044503 0.046680 -3.667830

O -3.086373 2.043110 -2.378060

C -2.348913 -1.413840 -2.063090

H 4.796807 0.913780 2.739470

H 5.215637 -1.533660 2.709620

H 3.305587 -3.105410 2.505370

H 0.996497 -2.236550 2.333500

H 2.487167 1.778550 2.557920

H -0.000693 1.145490 3.055860

H -1.364953 -0.485710 0.516230

H -0.520233 1.511410 -1.495860

H -2.564053 2.282600 -0.372780

H -3.418853 0.804320 -0.819330

H -0.264883 -0.933180 -1.938950

H -0.866413 -0.814170 -4.318560

H -0.197063 0.729680 -3.780200

H -1.943393 0.558940 -4.012460

H -2.479773 2.747340 -2.631600

H -2.158373 -2.302170 -2.670760

H -2.482503 -1.752750 -1.030730

H -3.294493 -0.980150 -2.399010

**Ball-cylinder model for (*R*)-FPA-amide 17 and cartesian coordinates (Gaussian 09).**

**
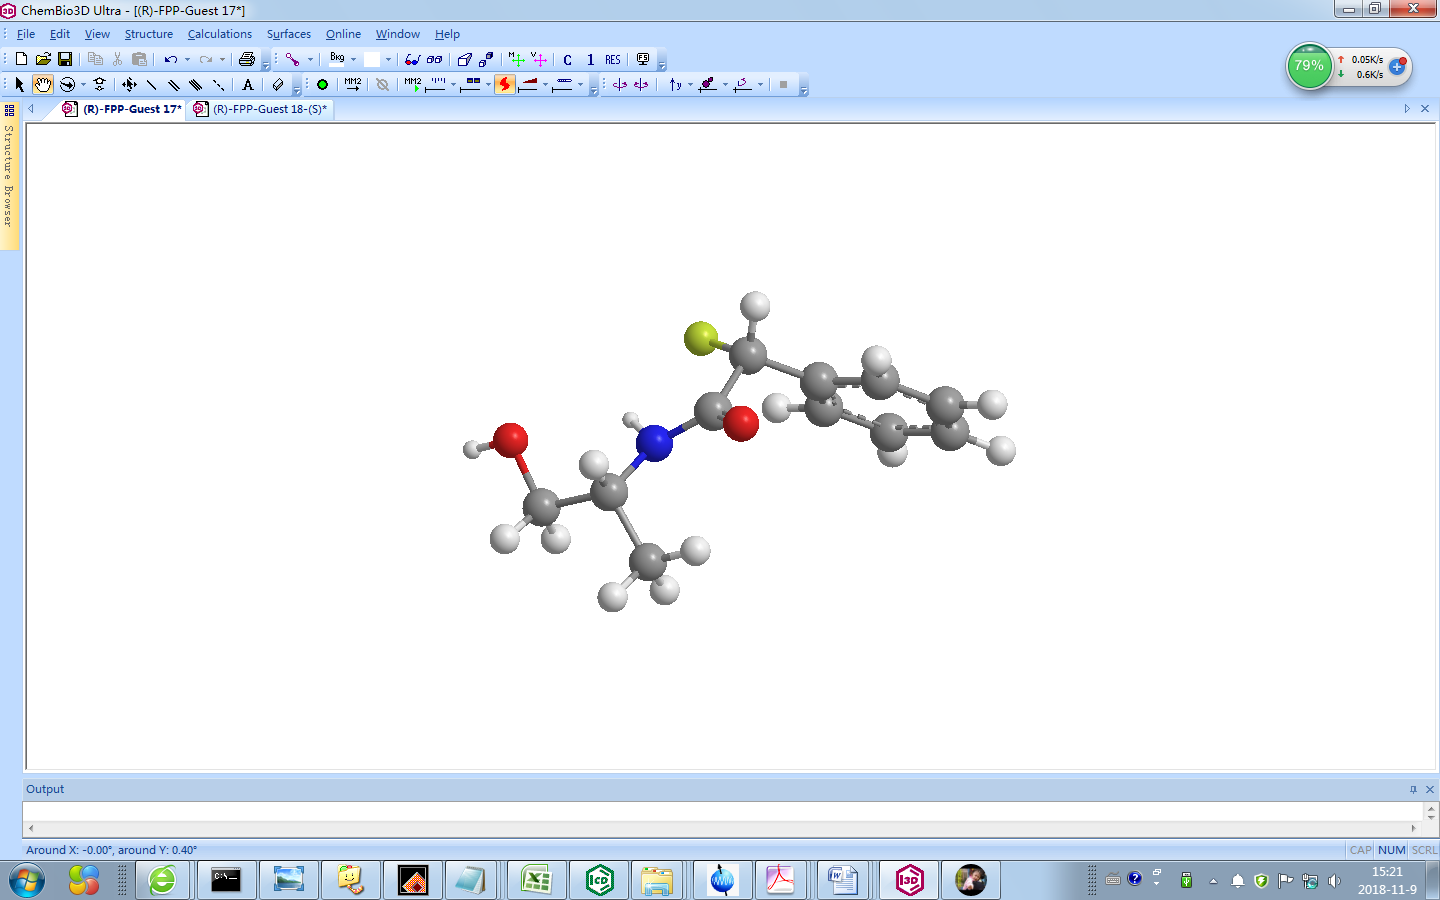
** δα-F*R* (calcd.) = -189.90 ppm

C 3.085543 -0.707293 2.091460

C 3.249553 -2.090613 2.067340

C 2.139733 -2.914663 1.882790

C 0.872693 -2.358813 1.726670

C 0.707443 -0.970983 1.746980

C 1.819713 -0.146963 1.928480

C -0.668347 -0.375133 1.548090

C -1.097037 -0.402613 0.067600

F -0.694967 0.946397 2.032880

N -1.139667 0.799337 -0.538730

O -1.345157 -1.479413 -0.459610

C -1.659197 1.000677 -1.896820

C -1.760567 2.503637 -2.135640

C -0.776657 0.340247 -2.958390

O -2.511107 3.078887 -1.065980

H 3.943133 -0.060273 2.237800

H 4.234653 -2.524723 2.195130

H 2.258803 -3.992063 1.866360

H 0.011753 -2.999783 1.579760

H 1.692083 0.927597 1.952820

H -1.420767 -0.933353 2.109120

H -1.135857 1.613207 0.061580

H -2.666587 0.570867 -1.948100

H -2.248337 2.673417 -3.102440

H -0.750907 2.933907 -2.176740

H -1.186627 0.523867 -3.955110

H -0.731187 -0.735283 -2.795330

H 0.239053 0.743247 -2.919370

H -2.461197 4.036687 -1.142610

**Ball-cylinder model for (*S*)-FPA-amide 17 and cartesian coordinates (Gaussian 09).**


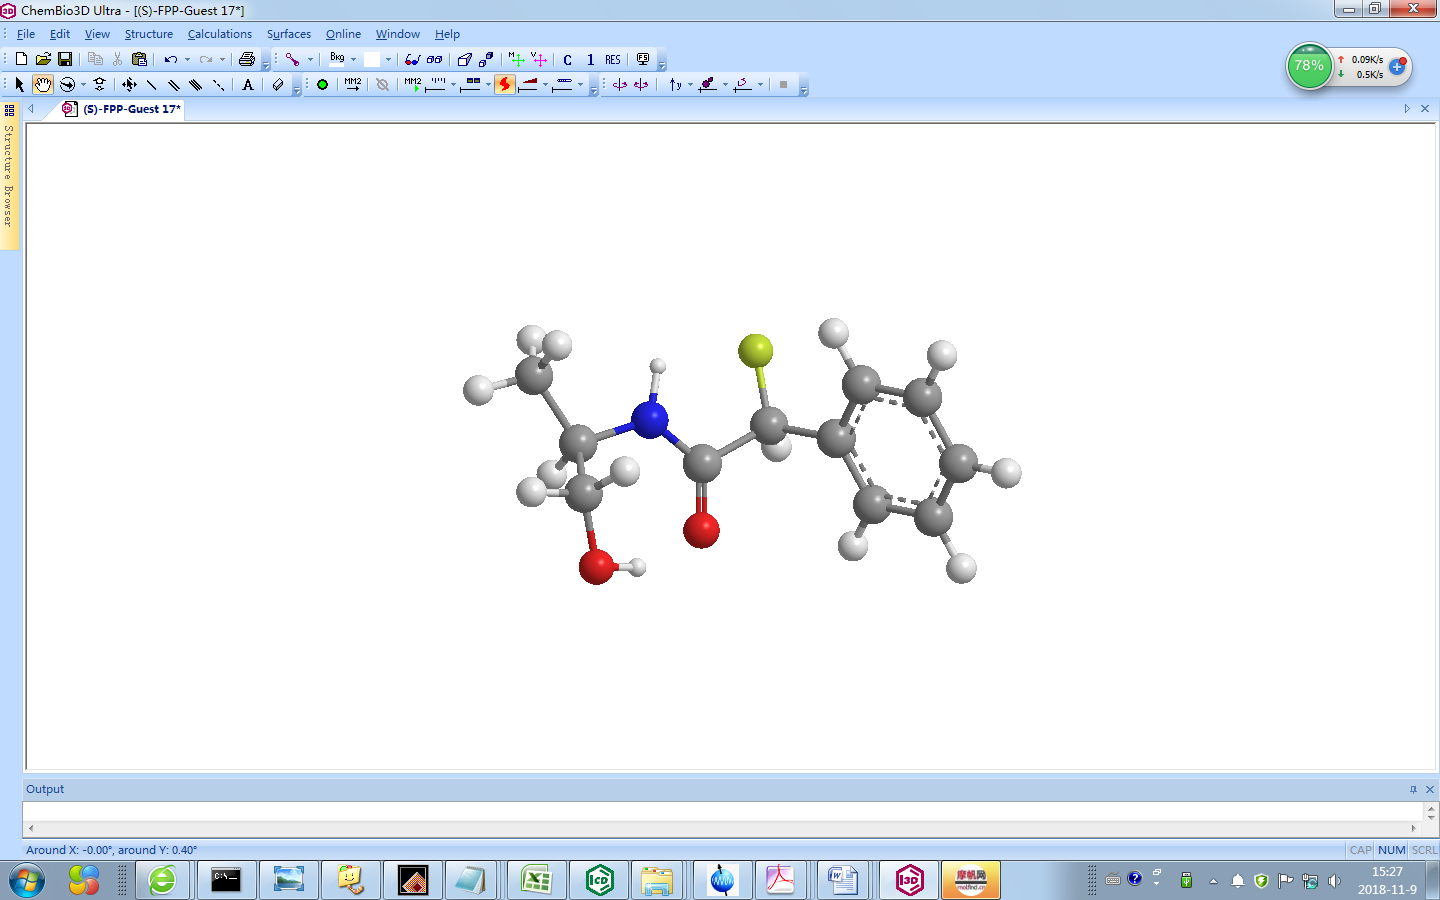
 δα-F*S* (calcd.) = -188.65 ppm

C 3.366783 -0.136593 2.084686

C 4.001743 -1.025203 1.217566

C 3.239683 -1.886883 0.431616

C 1.848043 -1.859733 0.506226

C 1.211983 -0.971503 1.375376

C 1.977183 -0.111003 2.167296

C -0.298257 -0.918233 1.452186

C -0.872997 0.280977 0.678976

F -0.849527 -2.113423 0.955816

N -1.608987 -0.018373 -0.399664

O -0.621877 1.415317 1.087426

C -2.357617 0.949027 -1.230474

C -1.446947 2.007457 -1.883004

C -3.138627 0.154487 -2.277144

O -1.135287 3.096737 -1.033244

H 3.953453 0.533917 2.702126

H 5.083873 -1.048013 1.158276

H 3.726473 -2.583393 -0.241564

H 1.256743 -2.534773 -0.099034

H 1.485743 0.582417 2.838906

H -0.633997 -0.818713 2.486796

H -1.757837 -1.001413 -0.579374

H -3.056197 1.486127 -0.579514

H -1.975957 2.430037 -2.740914

H -0.542137 1.507737 -2.260814

H -3.796717 0.818297 -2.839384

H -3.758237 -0.612593 -1.805924

H -2.461277 -0.334563 -2.983784

H -0.839217 2.711887 -0.189444

**Ball-cylinder model for (*R*)-FPA-amide 18 and cartesian coordinates (Gaussian 09).**

**
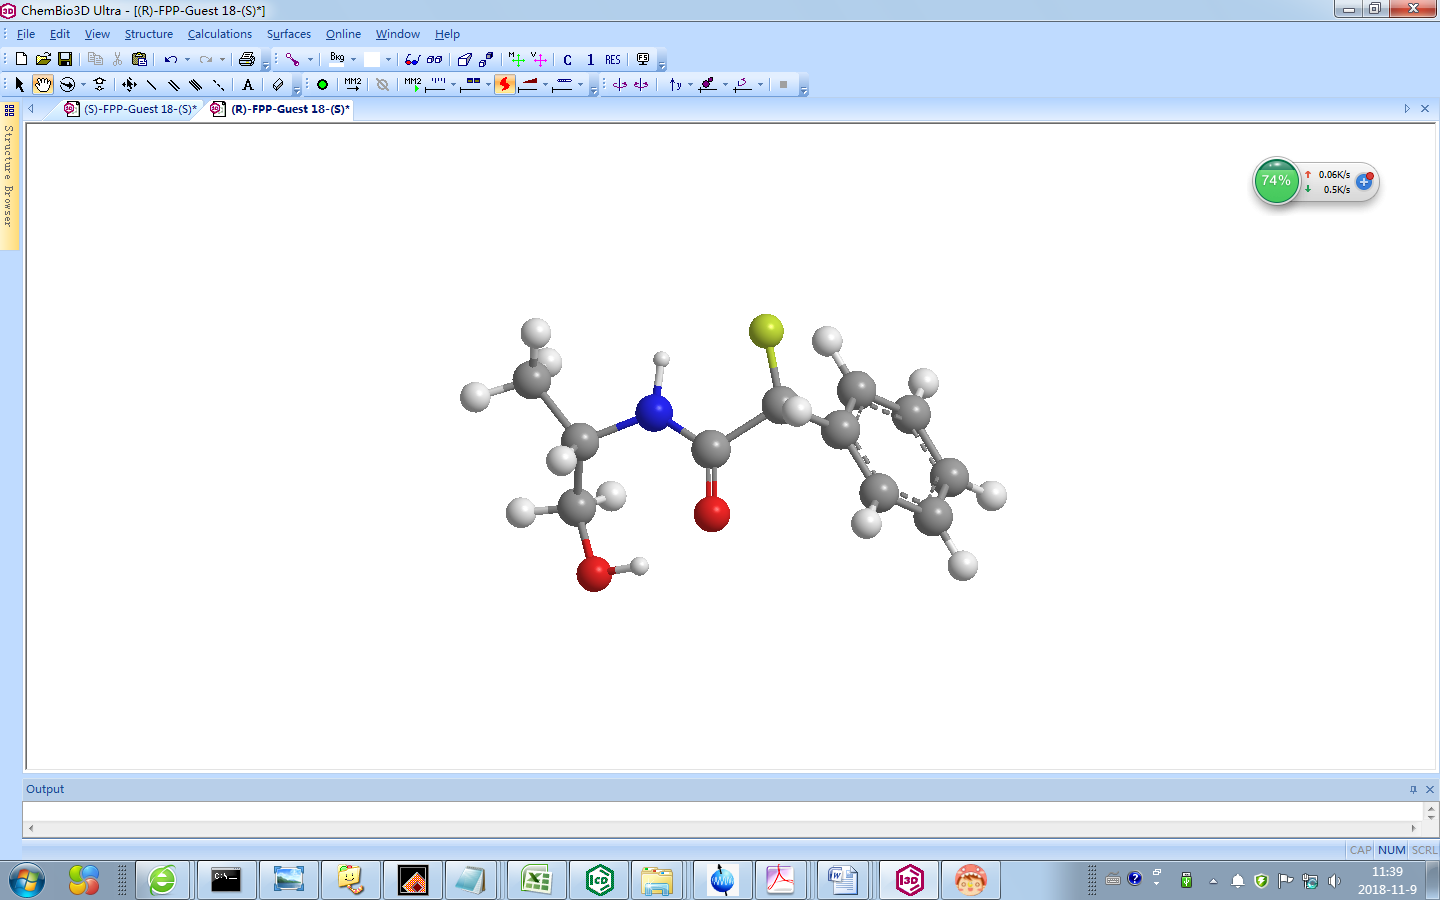
** δα-F*R* (calcd.) = -188.65 ppm

C 3.28214 -0.00649 -2.16759

C 3.9171 -0.8951 -1.30047

C 3.15504 -1.75678 -0.51452

C 1.7634 -1.72963 -0.58913

C 1.12734 -0.8414 -1.45828

C 1.89254 0.0191 -2.2502

C -0.3829 -0.78813 -1.53509

C -0.95764 0.41108 -0.76188

F -0.93417 -1.98332 -1.03872

N -1.69363 0.11173 0.31676

O -0.70652 1.54542 -1.17033

C -2.44226 1.07913 1.14757

C -1.53159 2.13756 1.8001

C -3.22327 0.28459 2.19424

O -1.21993 3.22684 0.95034

H 3.86881 0.66402 -2.78503

H 4.99923 -0.91791 -1.24118

H 3.64183 -2.45329 0.15866

H 1.1721 -2.40467 0.01613

H 1.4011 0.71252 -2.92181

H -0.71864 -0.68861 -2.5697

H -1.84248 -0.87131 0.49647

H -3.14084 1.61623 0.49661

H -2.0606 2.56014 2.65801

H -0.62678 1.63784 2.17791

H -3.88136 0.9484 2.75648

H -3.84288 -0.48249 1.72302

H -2.54592 -0.20446 2.90088

H -0.92386 2.84199 0.10654

**Ball-cylinder model for (*S*)-FPA-amide 18 and cartesian coordinates (Gaussian 09).**


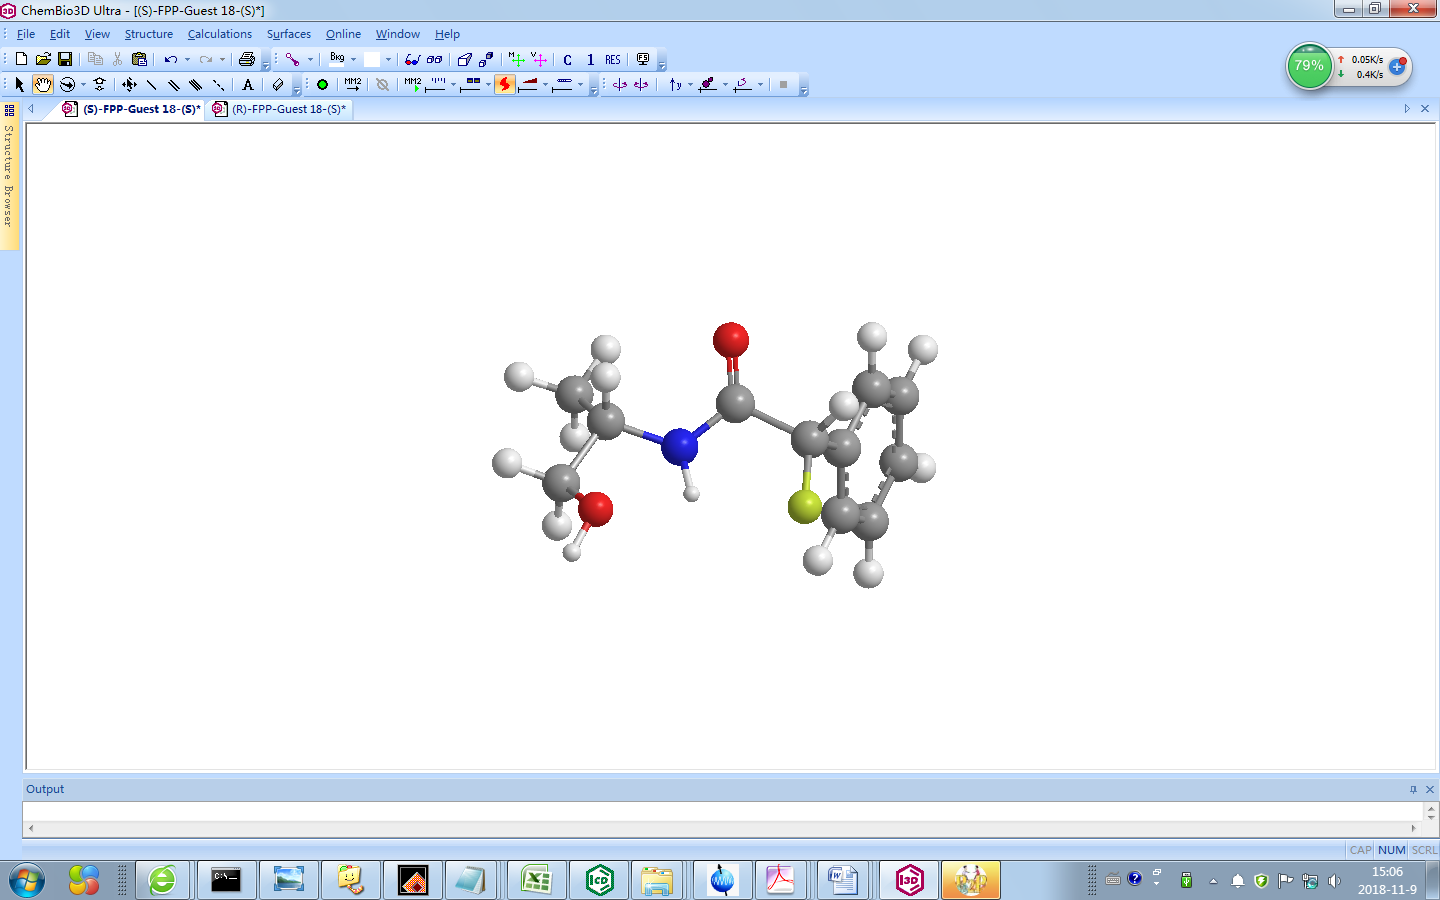
 δα-F*S* (calcd.) = -189.90 ppm

C 3.88118 -0.29635 -1.92742

C 4.04519 -1.67967 -1.9033

C 2.93537 -2.50372 -1.71875

C 1.66833 -1.94787 -1.56263

C 1.50308 -0.56004 -1.58294

C 2.61535 0.26398 -1.76444

C 0.12729 0.03581 -1.38405

C -0.3014 0.00833 0.09644

F 0.10067 1.35734 -1.86884

N -0.34403 1.21028 0.70277

O -0.54952 -1.06847 0.62365

C -0.86356 1.41162 2.06086

C -0.96493 2.91458 2.29968

C 0.01898 0.75119 3.12243

O -1.71547 3.48983 1.23002

H 4.73877 0.35067 -2.07376

H 5.03029 -2.11378 -2.03109

H 3.05444 -3.58112 -1.70232

H 0.80739 -2.58884 -1.41572

H 2.48772 1.33854 -1.78878

H -0.62513 -0.52241 -1.94508

H -0.34022 2.02415 0.10246

H -1.87095 0.98181 2.11214

H -1.4527 3.08436 3.26648

H 0.04473 3.34485 2.34078

H -0.39099 0.93481 4.11915

H 0.06445 -0.32434 2.95937

H 1.03469 1.15419 3.08341

H -1.66556 4.44763 1.30665

**Ball-cylinder model for (*R*)-FPA-amide 19 and cartesian coordinates (Gaussian 09).**

**
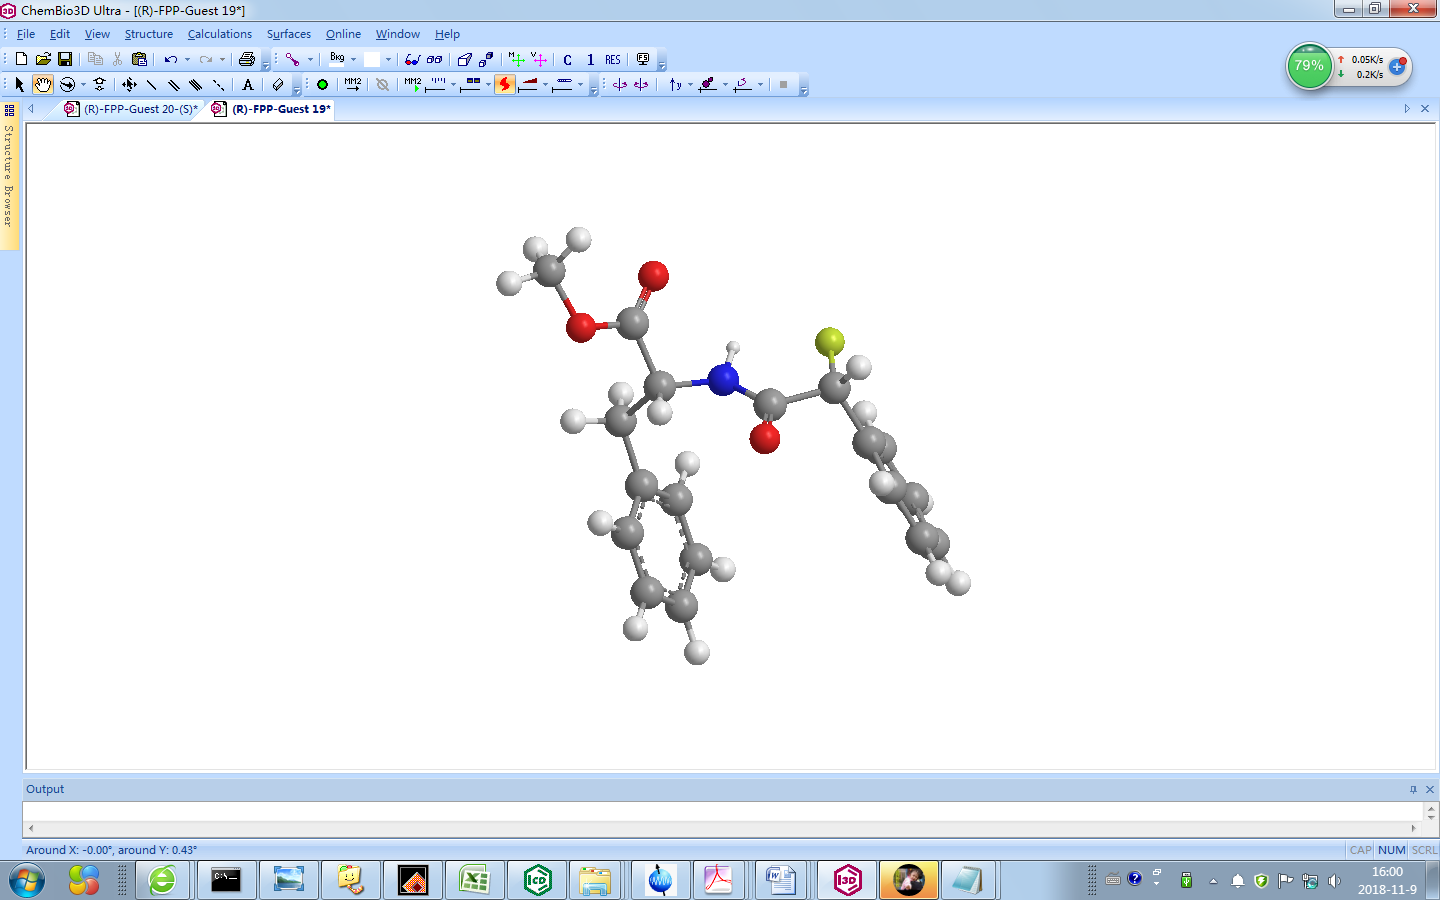
** δα-F*R* (calcd.) = -194.83 ppm

C 3.141110 -2.654470 2.668230

C 4.161130 -1.859600 3.190740

C 3.943150 -0.497750 3.384400

C 2.712990 0.071100 3.056570

C 1.691610 -0.724050 2.534660

C 1.909800 -2.091960 2.344210

C 0.350640 -0.121020 2.174320

C 0.115990 -0.066240 0.653390

F 0.237470 1.169780 2.721340

N 0.036060 1.178320 0.130930

O 0.016970 -1.105900 0.020020

C -0.297670 1.421780 -1.258260

C -1.571150 2.262450 -1.329770

C 0.840990 2.144340 -2.031690

O -2.119820 2.196780 -2.548350

C 2.127160 1.352610 -2.086650

C 2.270720 0.291670 -2.988510

C 3.449800 -0.446840 -3.039530

C 4.508350 -0.135000 -2.186700

C 4.378260 0.919610 -1.286260

C 3.195730 1.656800 -1.238330

O -2.004500 2.927060 -0.418990

C -3.304440 2.998510 -2.762680

H 3.302150 -3.715690 2.516160

H 5.117580 -2.300560 3.447660

H 4.729640 0.126680 3.793060

H 2.542000 1.127660 3.215910

H 1.121220 -2.708780 1.931550

H -0.465180 -0.712850 2.596430

H -0.010660 1.956920 0.773180

H -0.487770 0.452610 -1.719890

H 1.019050 3.114700 -1.558890

H 0.476460 2.338940 -3.043350

H 1.454200 0.043550 -3.659430

H 3.543520 -1.264080 -3.745980

H 5.427060 -0.709250 -2.225340

H 5.195810 1.169520 -0.619390

H 3.103860 2.479860 -0.537410

H -3.079470 4.053560 -2.605730

H -4.096390 2.687800 -2.081270

H -3.592640 2.816410 -3.794400

**Ball-cylinder model for (*S*)-FPA-amide 19 and cartesian coordinates (Gaussian 09).**


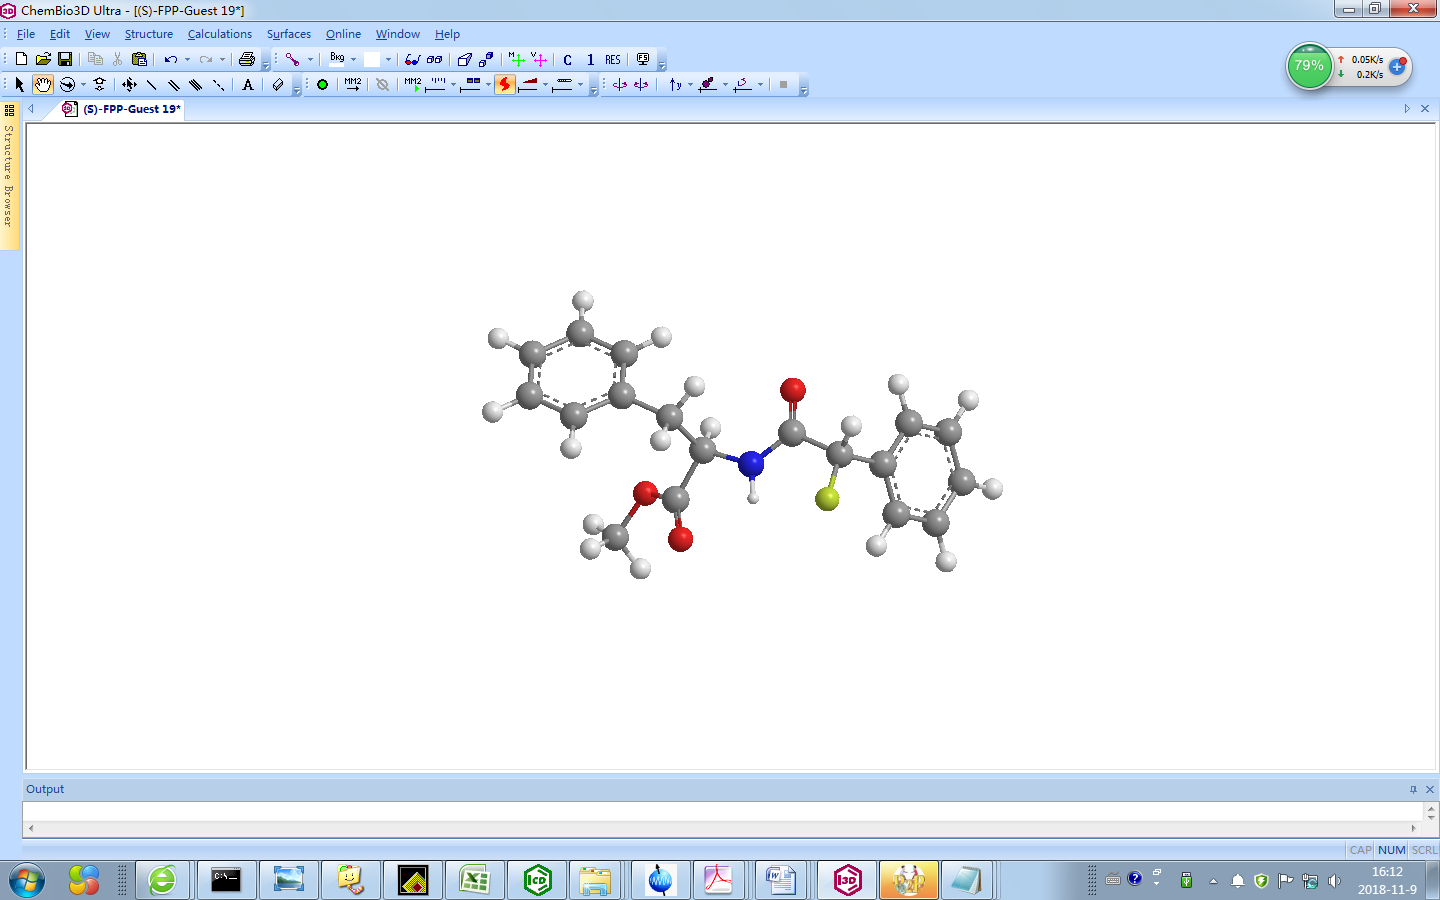
 δα-F*S* (calcd.) = -194.06 ppm

C 3.511330 -4.529053 0.705987

C 2.653520 -5.620613 0.571477

C 1.332800 -5.516903 1.001447

C 0.866840 -4.328163 1.561787

C 1.725280 -3.236013 1.698167

C 3.052080 -3.341893 1.269587

C 1.231590 -1.936373 2.297467

C 1.080570 -0.830483 1.237787

F 0.002400 -2.139773 2.948117

N -0.184560 -0.441943 0.988547

O 2.073550 -0.373973 0.686837

C -0.506130 0.589637 0.015647

C -1.931070 0.334147 -0.458593

C -0.365090 2.010157 0.642557

O -2.120710 0.761747 -1.706103

C -0.514890 3.153597 -0.334323

C 0.519960 3.462647 -1.225563

C 0.391100 4.512617 -2.131063

C -0.775940 5.276007 -2.157273

C -1.810020 4.982097 -1.270993

C -1.678400 3.928247 -0.367563

O -2.785070 -0.172753 0.233287

C -3.463220 0.639547 -2.231623

H 4.541530 -4.602783 0.376627

H 3.014320 -6.546153 0.137457

H 0.660440 -6.361673 0.902987

H -0.157590 -4.251703 1.902207

H 3.717150 -2.492753 1.367637

H 1.930330 -1.564403 3.050377

H -0.948430 -0.851373 1.509227

H 0.179010 0.503027 -0.827673

H 0.630080 2.038147 1.092677

H -1.093560 2.098537 1.452887

H 1.435590 2.880027 -1.204983

H 1.204070 4.739337 -2.811873

H -0.875230 6.096407 -2.859033

H -2.718160 5.574687 -1.278943

H -2.486440 3.709007 0.323107

H -3.763790 -0.407893 -2.252593

H -3.414780 1.047047 -3.237473

H -4.160460 1.209997 -1.618203

**Ball-cylinder model for (*R*)-FPA-amide 20 and cartesian coordinates (Gaussian 09).**


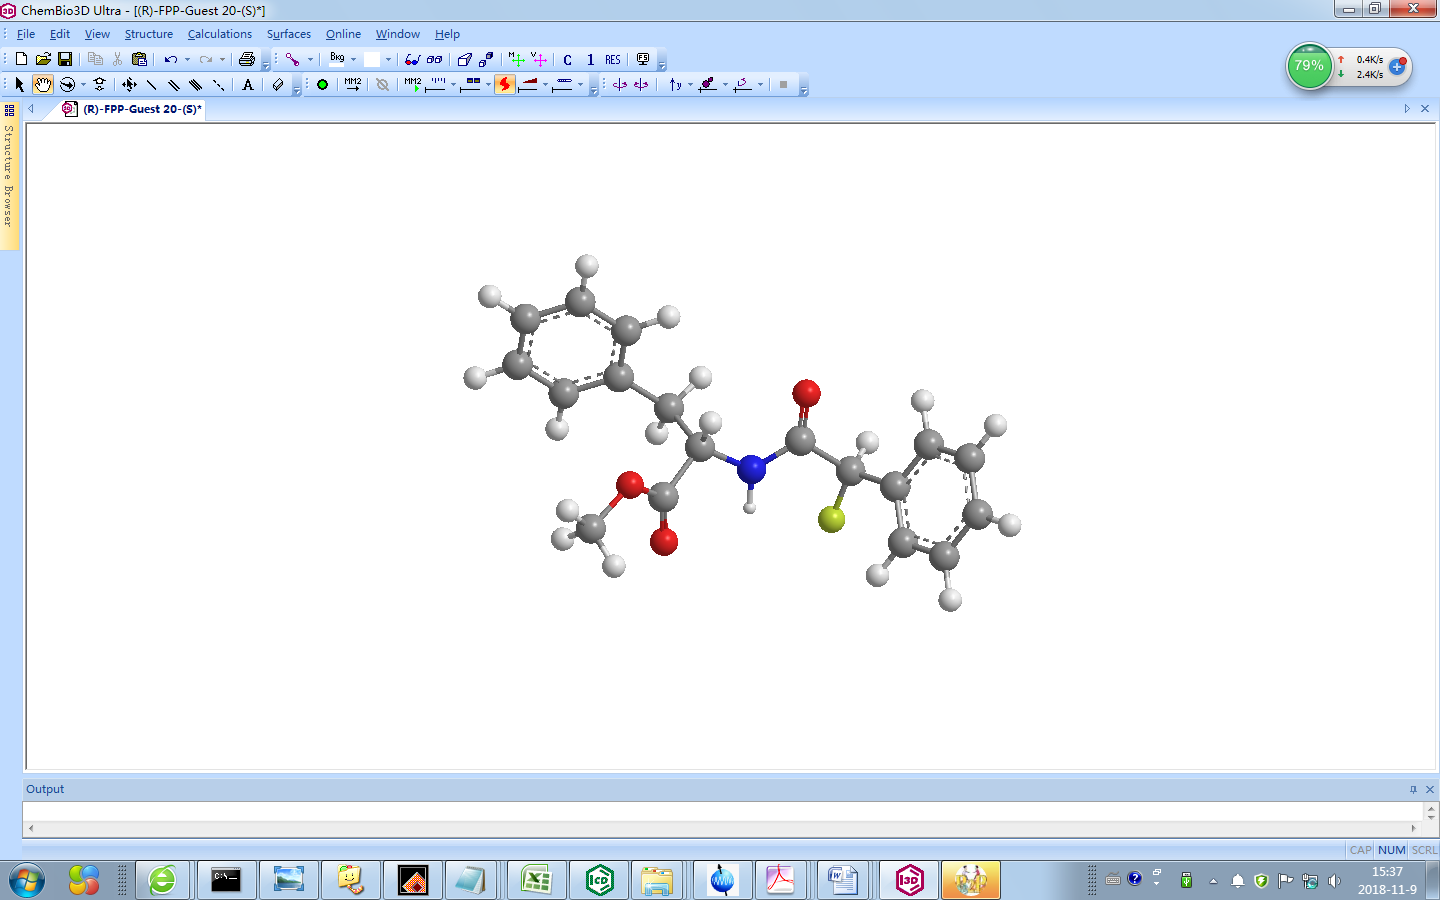
 δα-F*R* (calcd.) = -194.06 ppm

C 3.84246 -3.42556 -1.18541

C 2.98465 -4.51712 -1.0509

C 1.66393 -4.41341 -1.48087

C 1.19797 -3.22467 -2.04121

C 2.05641 -2.13252 -2.17759

C 3.38321 -2.2384 -1.74901

C 1.56272 -0.83288 -2.77689

C 1.4117 0.27301 -1.71721

F 0.33353 -1.03628 -3.42754

N 0.14657 0.66155 -1.46797

O 2.40468 0.72952 -1.16626

C -0.175 1.69313 -0.49507

C -1.59994 1.43764 -0.02083

C -0.03396 3.11365 -1.12198

O -1.78958 1.86524 1.22668

C -0.18376 4.25709 -0.1451

C 0.85109 4.56614 0.74614

C 0.72223 5.61611 1.65164

C -0.44481 6.3795 1.67785

C -1.47889 6.08559 0.79157

C -1.34727 5.03174 -0.11186

O -2.45394 0.93074 -0.71271

C -3.13209 1.74304 1.7522

H 4.87266 -3.49929 -0.85605

H 3.34545 -5.44266 -0.61688

H 0.99157 -5.25818 -1.38241

H 0.17354 -3.14821 -2.38163

H 4.04828 -1.38926 -1.84706

H 2.26146 -0.46091 -3.5298

H -0.6173 0.25212 -1.98865

H 0.51014 1.60652 0.34825

H 0.96121 3.14164 -1.5721

H -0.76243 3.20203 -1.93231

H 1.76672 3.98352 0.72556

H 1.5352 5.84283 2.33245

H -0.5441 7.1999 2.37961

H -2.38703 6.67818 0.79952

H -2.15531 4.8125 -0.80253

H -3.43266 0.6956 1.77317

H -3.08365 2.15054 2.75805

H -3.82933 2.31349 1.13878

**Ball-cylinder model for (*S*)-FPA-amide 20 and cartesian coordinates (Gaussian 09).**


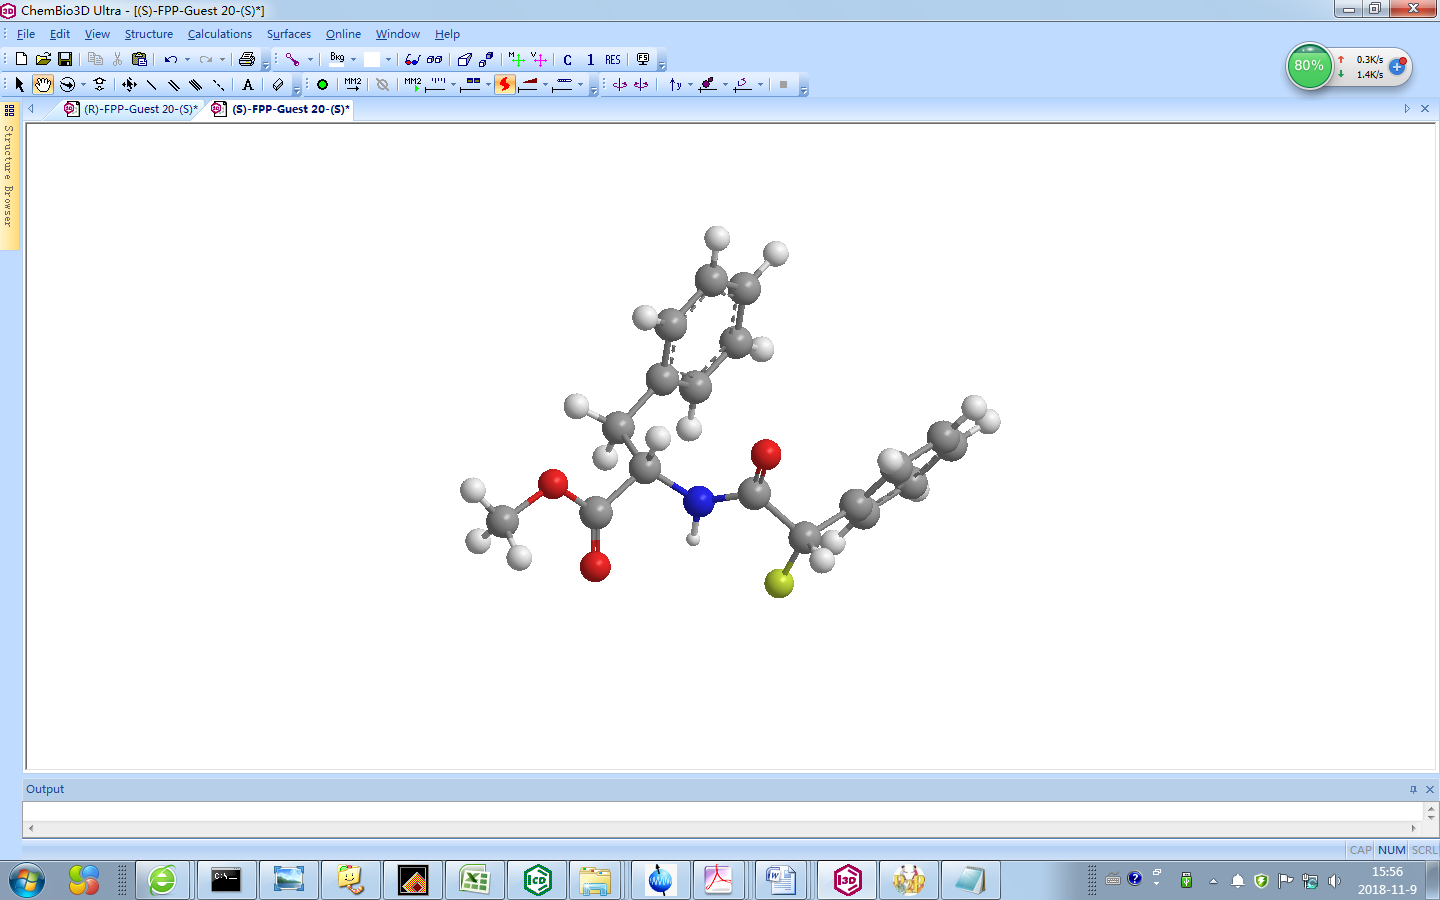
 δα-F*S* (calcd.) = -194.83 ppm

C 3.14111 -2.65447 -2.66823

C 4.16113 -1.8596 -3.19074

C 3.94315 -0.49775 -3.3844

C 2.71299 0.0711 -3.05657

C 1.69161 -0.72405 -2.53466

C 1.9098 -2.09196 -2.34421

C 0.35064 -0.12102 -2.17432

C 0.11599 -0.06624 -0.65339

F 0.23747 1.16978 -2.72134

N 0.03606 1.17832 -0.13093

O 0.01697 -1.1059 -0.02002

C -0.29767 1.42178 1.25826

C -1.57115 2.26245 1.32977

C 0.84099 2.14434 2.03169

O -2.11982 2.19678 2.54835

C 2.12716 1.35261 2.08665

C 2.27072 0.29167 2.98851

C 3.4498 -0.44684 3.03953

C 4.50835 -0.135 2.1867

C 4.37826 0.91961 1.28626

C 3.19573 1.6568 1.23833

O -2.0045 2.92706 0.41899

C -3.30444 2.99851 2.76268

H 3.30215 -3.71569 -2.51616

H 5.11758 -2.30056 -3.44766

H 4.72964 0.12668 -3.79306

H 2.542 1.12766 -3.21591

H 1.12122 -2.70878 -1.93155

H -0.46518 -0.71285 -2.59643

H -0.01066 1.95692 -0.77318

H -0.48777 0.45261 1.71989

H 1.01905 3.1147 1.55889

H 0.47646 2.33894 3.04335

H 1.4542 0.04355 3.65943

H 3.54352 -1.26408 3.74598

H 5.42706 -0.70925 2.22534

H 5.19581 1.16952 0.61939

H 3.10386 2.47986 0.53741

H -3.07947 4.05356 2.60573

H -4.09639 2.6878 2.08127

H -3.59264 2.81641 3.7944

**Ball-cylinder model for (*R*)-FPA-amide 21 and cartesian coordinates (Gaussian 09).**

**
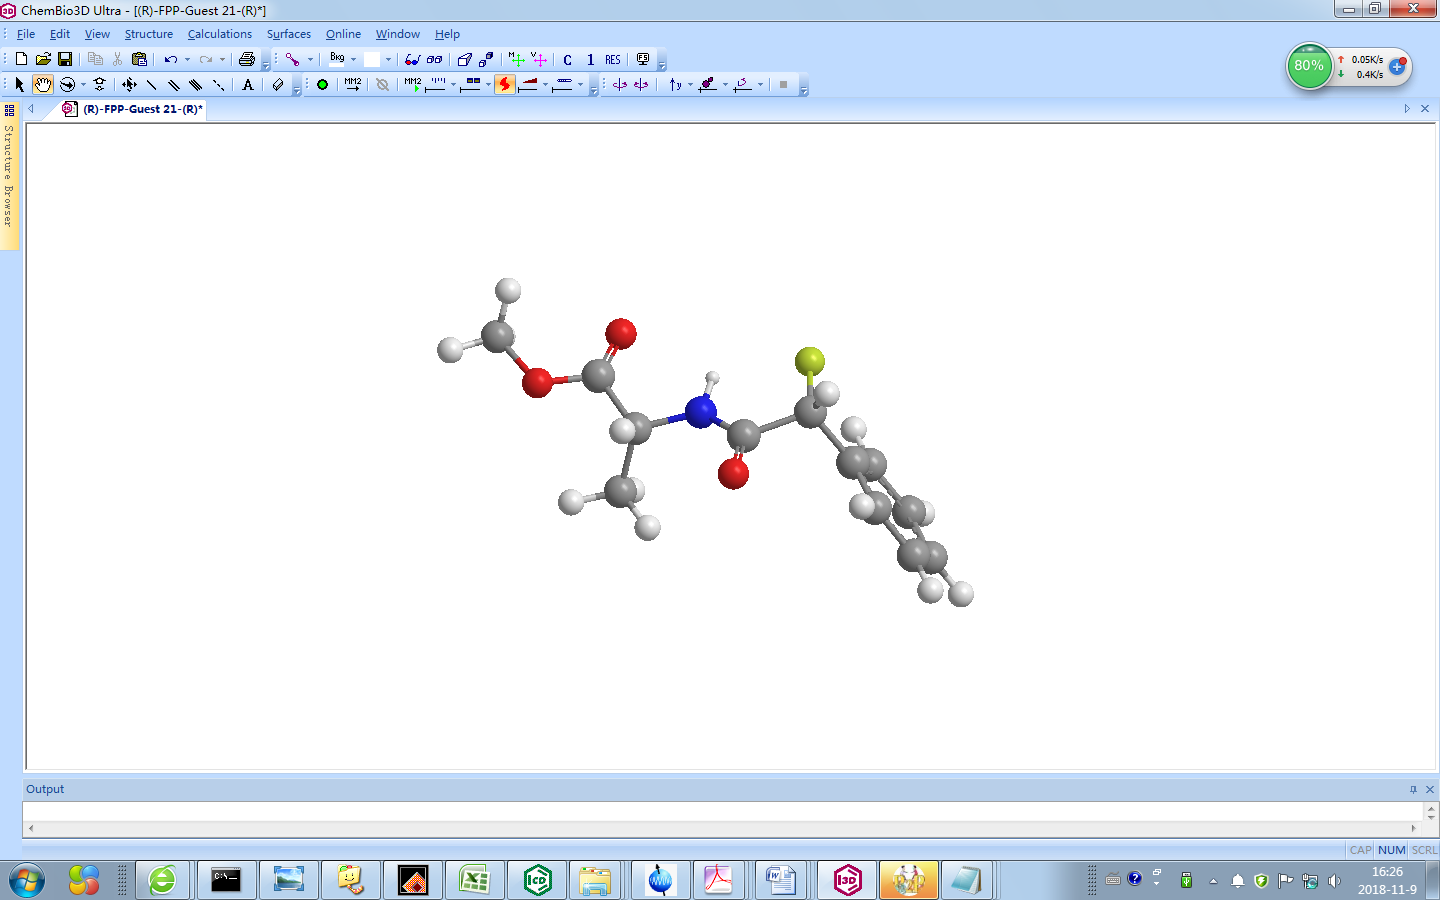
** δα-F*R* (calcd.) = -191.77 ppm

C 4.37214 -2.12705 -0.9258

C 4.0985 -3.32693 -1.58183

C 2.88319 -3.49058 -2.24294

C 1.94142 -2.4628 -2.24718

C 2.21561 -1.26051 -1.59279

C 3.4369 -1.09572 -0.93323

C 1.1961 -0.14288 -1.57386

C 0.4676 -0.05213 -0.221

F 0.26085 -0.3247 -2.60784

N -0.83942 -0.37208 -0.24829

O 1.08624 0.28561 0.7798

C -1.68434 -0.29827 0.93308

C -3.12341 -0.14042 0.45762

C -1.52903 -1.5276 1.8464

O -3.94093 0.12573 1.479

O -3.48039 -0.25895 -0.69184

C -5.34443 0.26579 1.15813

H 5.31723 -1.99087 -0.41252

H 4.82986 -4.12711 -1.5807

H 2.66471 -4.4191 -2.75821

H 1.00025 -2.58848 -2.76676

H 3.64905 -0.16562 -0.41997

H 1.67461 0.82411 -1.74444

H -1.29268 -0.55256 -1.13434

H -1.41418 0.59553 1.50212

H -1.80327 -2.4398 1.31145

H -2.16215 -1.42781 2.72884

H -0.48933 -1.60471 2.16499

H -5.72419 -0.65648 0.71856

H -5.83626 0.47156 2.10484

H -5.48961 1.09101 0.46102

**Ball-cylinder model for (*S*)-FPA-amide 21 and cartesian coordinates (Gaussian 09).**


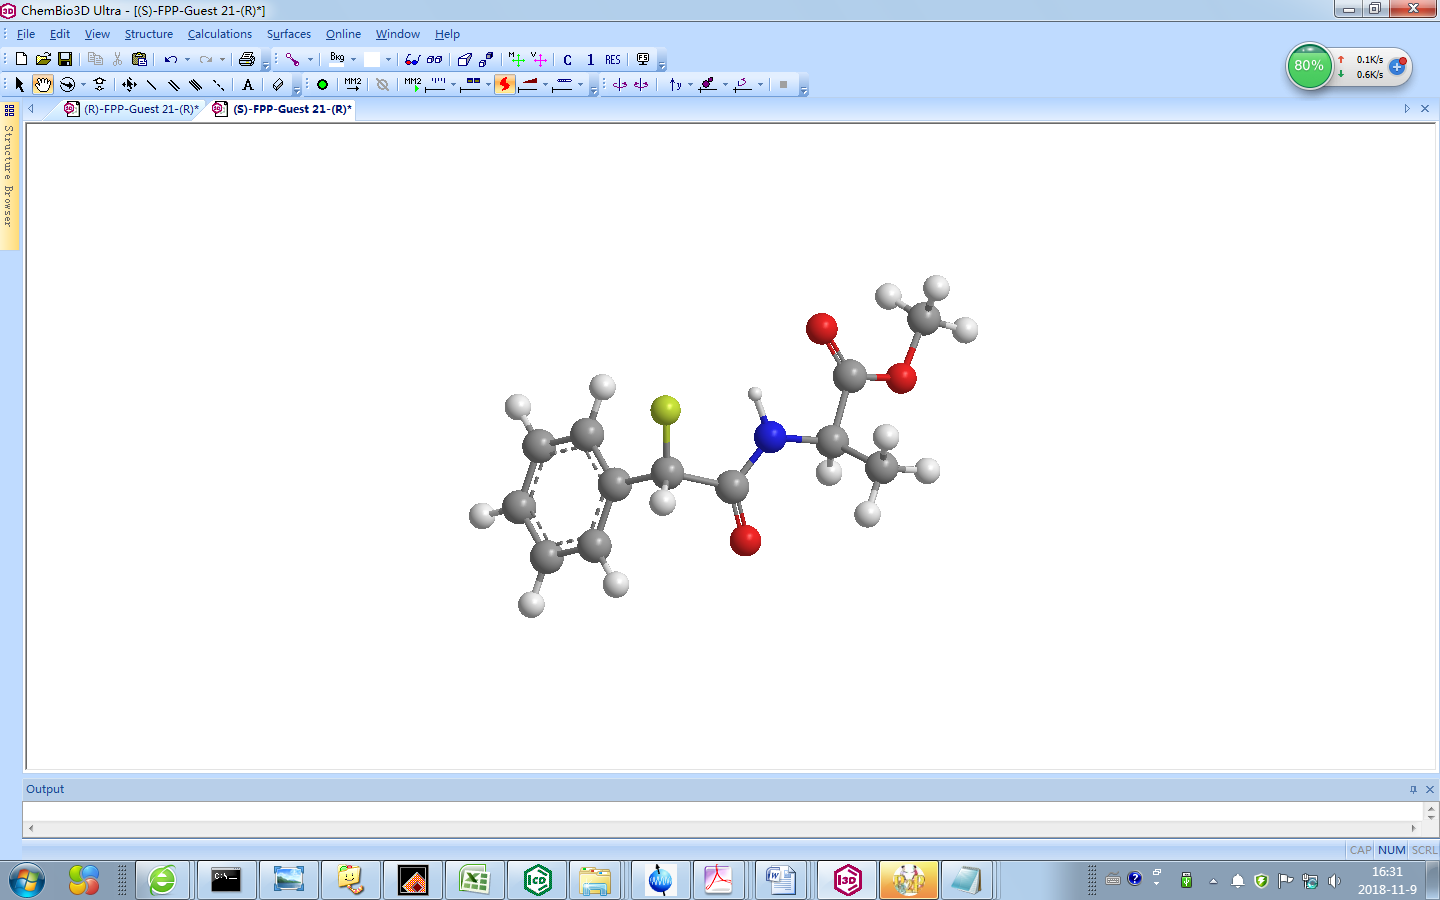
 δα-F*S* (calcd.) = -191.27 ppm

C 3.29639 0.17135 -2.86384

C 4.05847 -0.98701 -2.72646

C 3.45509 -2.16263 -2.28079

C 2.09644 -2.18061 -1.9762

C 1.33243 -1.01802 -2.1089

C 1.93773 0.15904 -2.55339

C -0.13553 -1.03683 -1.7462

C -0.35117 -0.95586 -0.22365

F -0.80245 0.0279 -2.37882

N -0.96729 0.15835 0.21171

O 0.03192 -1.87078 0.49346

C -1.20696 0.41916 1.62193

C -1.3852 1.92376 1.78481

C -2.42688 -0.34574 2.16691

O -1.38953 2.26894 3.0746

O -1.52563 2.69913 0.8674

C -1.59014 3.67175 3.36458

H 3.75785 1.08794 -3.21352

H 5.11501 -0.97566 -2.96888

H 4.04081 -3.06874 -2.17563

H 1.62968 -3.0943 -1.62818

H 1.3445 1.05745 -2.66635

H -0.61076 -1.95846 -2.08969

H -1.22923 0.87877 -0.44774

H -0.32263 0.11636 2.18864

H -2.56448 -0.13476 3.22814

H -2.26174 -1.41561 2.03853

H -3.33178 -0.05924 1.62595

H -2.55739 4.00051 2.98437

H -1.55711 3.74854 4.44787

H -0.79667 4.26624 2.91182

**Ball-cylinder model for (*R*)-FPA-amide 22 and cartesian coordinates (Gaussian 09).**

**
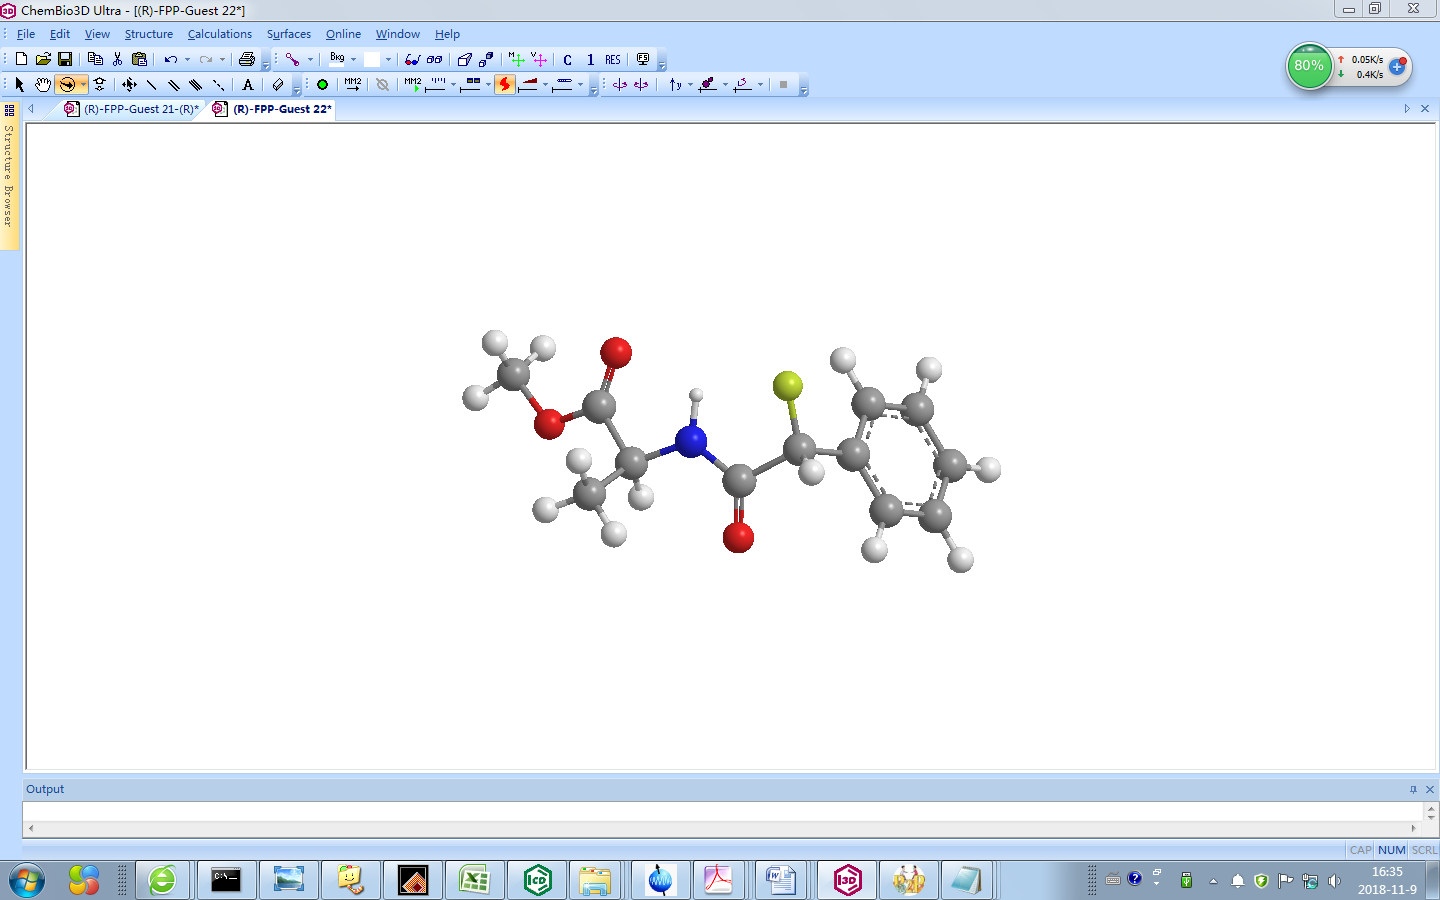
** δα-F*R* (calcd.) = -191.27 ppm

C 3.296390 0.171350 2.863840

C 4.058470 -0.987010 2.726460

C 3.455090 -2.162630 2.280790

C 2.096440 -2.180610 1.976200

C 1.332430 -1.018020 2.108900

C 1.937730 0.159040 2.553390

C -0.135530 -1.036830 1.746200

C -0.351170 -0.955860 0.223650

F -0.802450 0.027900 2.378820

N -0.967290 0.158350 -0.211710

O 0.031920 -1.870780 -0.493460

C -1.206960 0.419160 -1.621930

C -1.385200 1.923760 -1.784810

C -2.426880 -0.345740 -2.166910

O -1.389530 2.268940 -3.074600

O -1.525630 2.699130 -0.867400

C -1.590140 3.671750 -3.364580

H 3.757850 1.087940 3.213520

H 5.115010 -0.975660 2.968880

H 4.040810 -3.068740 2.175630

H 1.629680 -3.094300 1.628180

H 1.344500 1.057450 2.666350

H -0.610760 -1.958460 2.089690

H -1.229230 0.878770 0.447740

H -0.322630 0.116360 -2.188640

H -2.564480 -0.134760 -3.228140

H -2.261740 -1.415610 -2.038530

H -3.331780 -0.059240 -1.625950

H -2.557390 4.000510 -2.984370

H -1.557110 3.748540 -4.447870

H -0.796670 4.266240 -2.911820

**Ball-cylinder model for (*S*)-FPA-amide 22 and cartesian coordinates (Gaussian 09).**


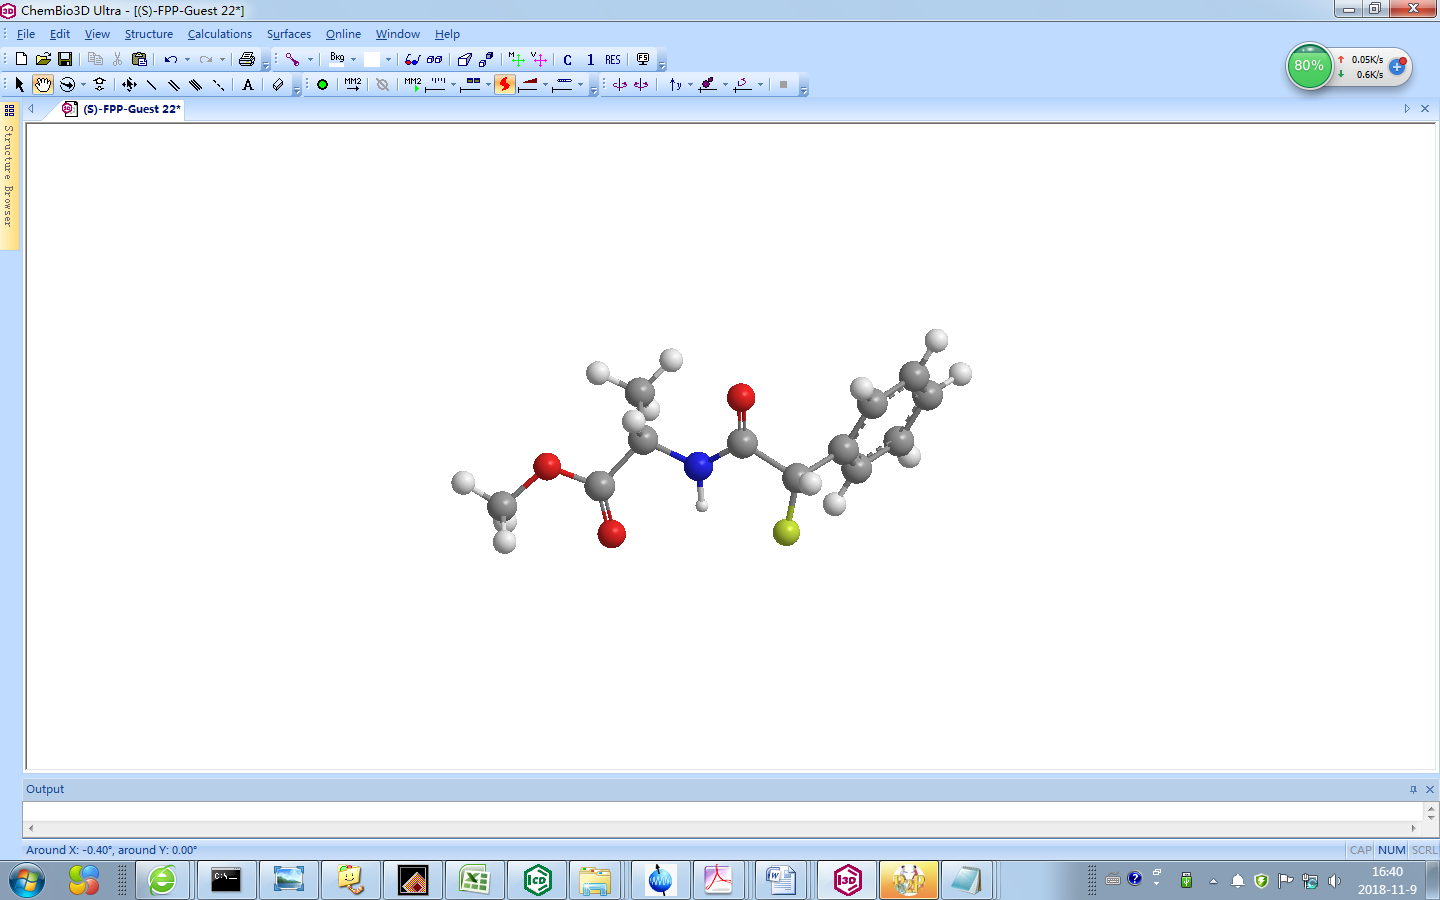
 δα-F*S* (calcd.) = -191.77 ppm

C 4.470829 -1.056282 0.666520

C 4.197189 -2.256162 1.322550

C 2.981879 -2.419812 1.983660

C 2.040109 -1.392032 1.987900

C 2.314299 -0.189742 1.333510

C 3.535589 -0.024952 0.673950

C 1.294789 0.927888 1.314580

C 0.566289 1.018638 -0.038280

F 0.359539 0.746068 2.348560

N -0.740731 0.698688 -0.010990

O 1.184929 1.356378 -1.039080

C -1.585651 0.772498 -1.192360

C -3.024721 0.930348 -0.716900

C -1.430341 -0.456832 -2.105680

O -3.842241 1.196498 -1.738280

O -3.381701 0.811818 0.432560

C -5.245741 1.336558 -1.417410

H 5.415919 -0.920102 0.153240

H 4.928549 -3.056342 1.321420

H 2.763399 -3.348332 2.498930

H 1.098939 -1.517712 2.507480

H 3.747739 0.905148 0.160690

H 1.773299 1.894878 1.485160

H -1.193991 0.518208 0.875060

H -1.315491 1.666298 -1.761400

H -1.704581 -1.369032 -1.570730

H -2.063461 -0.357042 -2.988120

H -0.390641 -0.533942 -2.424270

H -5.625501 0.414288 -0.977840

H -5.737571 1.542328 -2.364120

H -5.390921 2.161778 -0.720300

**Ball-cylinder model for (*R*)-FPP-(*R*)-amine 23 and cartesian coordinates (Gaussian 09).**

**
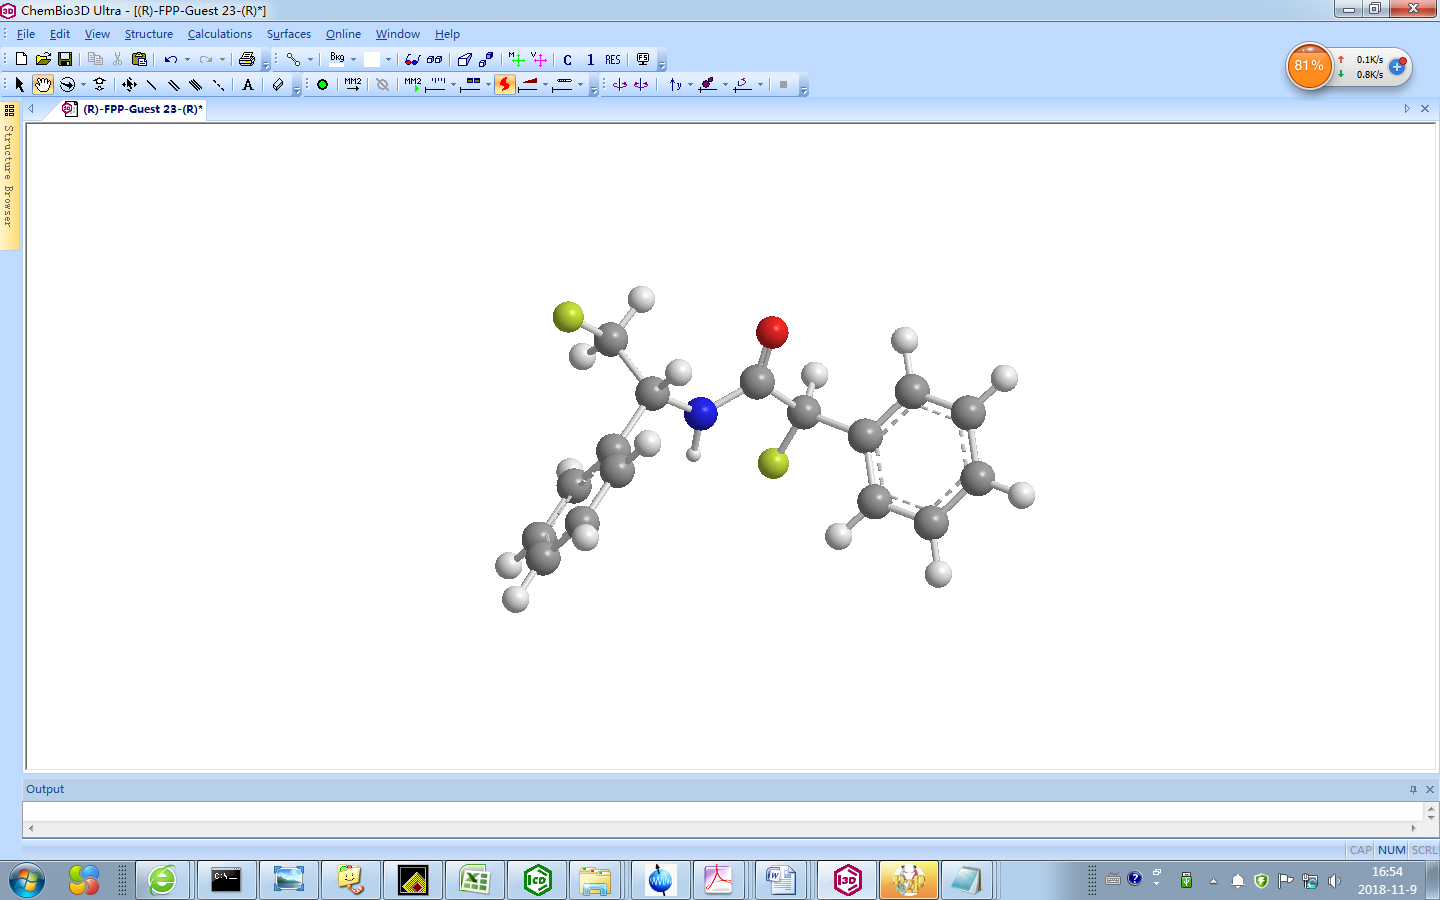
** δα-F*R* (calcd.) = -193.63 ppm

C 4.32136 -2.32897 -1.06888

C 3.75502 -2.98243 -2.16315

C 2.66391 -2.41487 -2.81731

C 2.13593 -1.20101 -2.38013

C 2.7038 -0.54552 -1.2863

C 3.80127 -1.11344 -0.63283

C 2.13063 0.76311 -0.78909

C 1.3039 0.57672 0.49655

F 1.33168 1.35256 -1.78605

N -0.01492 0.84032 0.38035

O 1.85439 0.21103 1.52516

C -0.9563 0.63475 1.48713

C -0.9214 1.85537 2.41358

C -2.34172 0.31816 0.9563

F -1.74105 1.6091 3.52101

C -2.91743 -0.92931 1.20778

C -4.18612 -1.2386 0.72069

C -4.89283 -0.30255 -0.03103

C -4.32642 0.94495 -0.28966

C -3.06107 1.25407 0.20336

H 5.17247 -2.76298 -0.55667

H 4.16449 -3.92611 -2.50505

H 2.22033 -2.91542 -3.67054

H 1.29247 -0.75762 -2.89342

H 4.23872 -0.60924 0.22025

H 2.92603 1.47568 -0.55939

H -0.36688 1.1249 -0.52183

H -0.58942 -0.21625 2.06478

H 0.09463 2.01771 2.77633

H -1.28939 2.75403 1.91345

H -2.36992 -1.66153 1.7912

H -4.62004 -2.21023 0.92761

H -5.87931 -0.54155 -0.41152

H -4.87148 1.67967 -0.87127

H -2.64174 2.23448 0.001

**Ball-cylinder model for (*S*)-FPP-(*R*)-amine 23 and cartesian coordinates (Gaussian 09).**


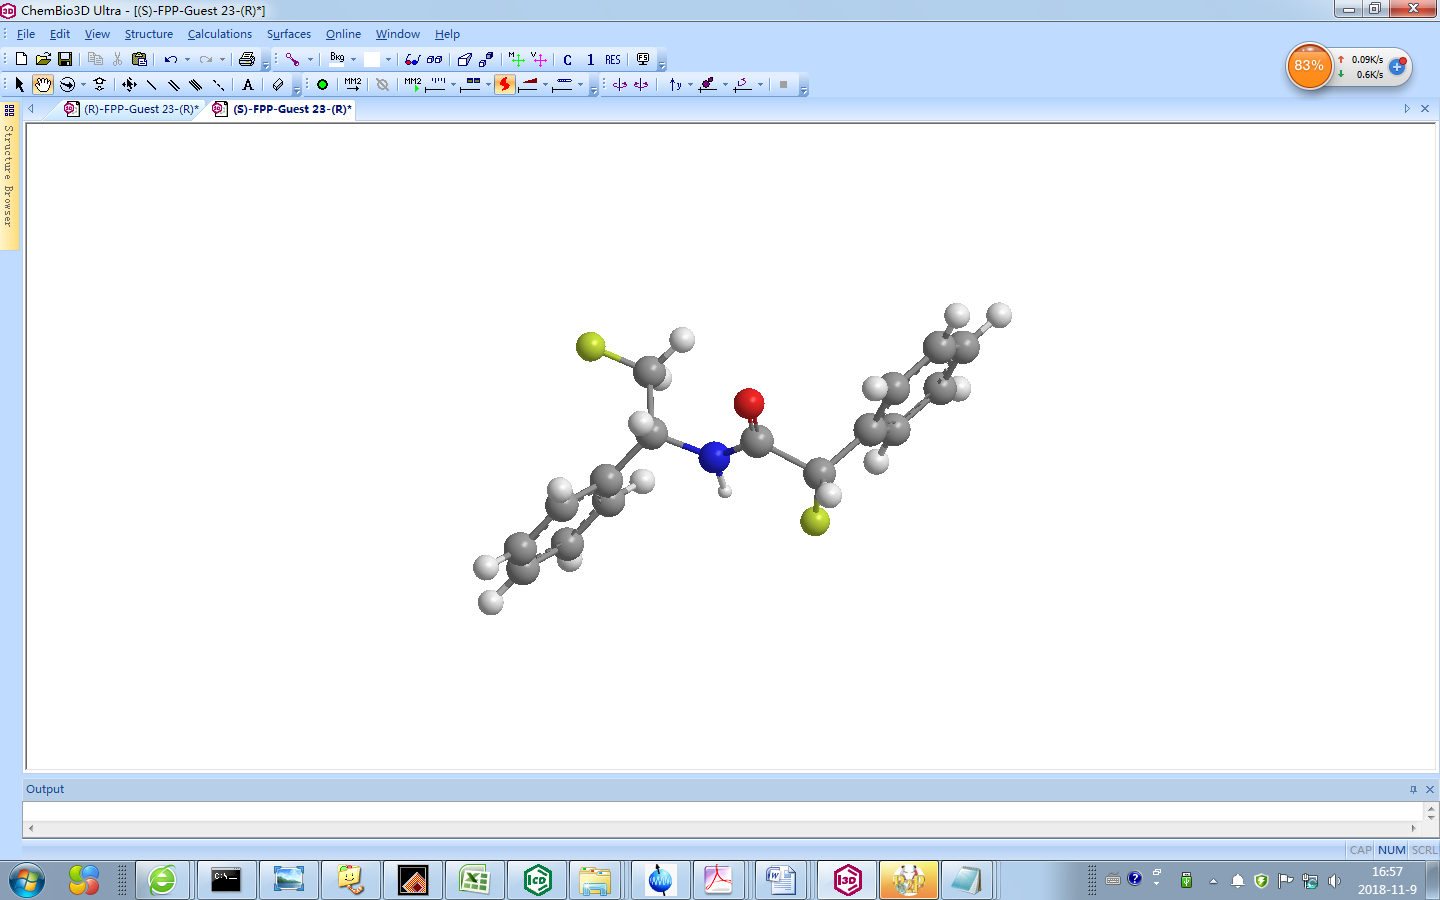
 δα-F*S* (calcd.) = -192.95 ppm

C 4.18912 0.16882 -2.66523

C 5.20114 -0.46067 -1.94425

C 4.87278 -1.41724 -0.98384

C 3.54045 -1.74433 -0.74706

C 2.52401 -1.10925 -1.46694

C 2.85323 -0.15112 -2.42715

C 1.07736 -1.45603 -1.18928

C 0.58402 -0.85957 0.14126

F 0.26195 -1.00481 -2.24315

N -0.36351 0.09627 0.03149

O 1.05297 -1.25936 1.19718

C -0.99382 0.70932 1.20642

C -0.13511 1.88862 1.67617

C -2.43198 1.08801 0.90822

F -0.67932 2.40618 2.85709

C -3.47533 0.4595 1.59174

C -4.80254 0.78969 1.32334

C -5.10202 1.75128 0.3609

C -4.06809 2.38365 -0.32836

C -2.74238 2.05619 -0.05421

H 4.43656 0.91024 -3.4165

H 6.23942 -0.21157 -2.1313

H 5.65492 -1.91444 -0.42155

H 3.28683 -2.48401 0.00252

H 2.06843 0.33253 -2.99422

H 0.94027 -2.53769 -1.1235

H -0.73136 0.29672 -0.887

H -0.97613 -0.0381 2.00232

H 0.87847 1.5477 1.89305

H -0.1094 2.69086 0.93525

H -3.24655 -0.29039 2.34109

H -5.60058 0.29521 1.8654

H -6.13365 2.00904 0.15033

H -4.29297 3.13553 -1.07621

H -1.95079 2.56667 -0.59335

**Ball-cylinder model for (*R*)-FPP-(*S*)-amine 23 and cartesian coordinates (Gaussian 09).**


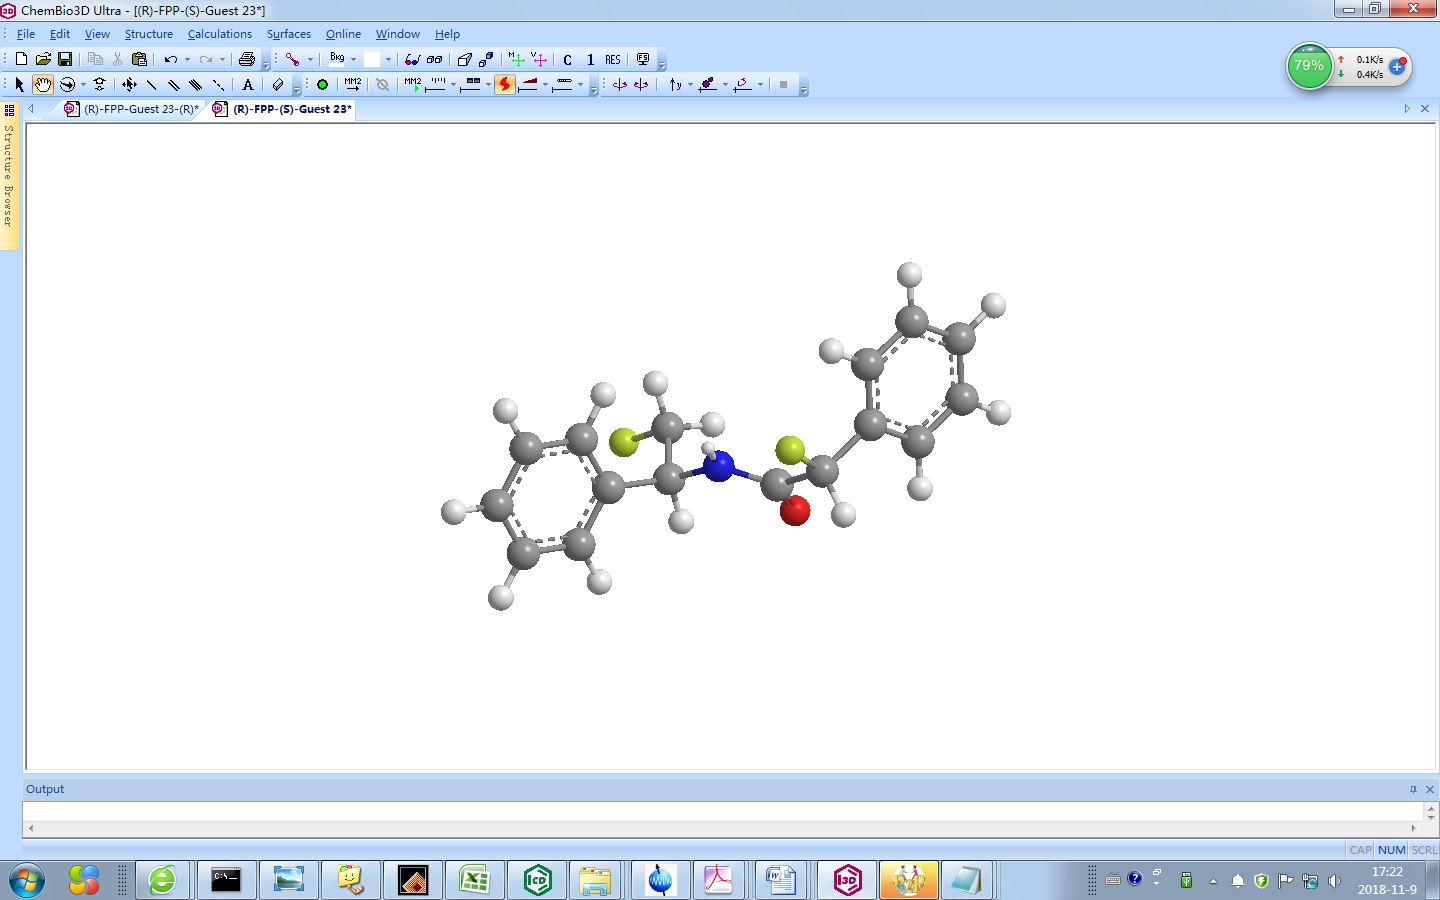
 δα-F*R* (calcd.) = -192.95 ppm

C 4.189120 0.168820 2.665230

C 5.201140 -0.460670 1.944250

C 4.872780 -1.417240 0.983840

C 3.540450 -1.744330 0.747060

C 2.524010 -1.109250 1.466940

C 2.853230 -0.151120 2.427150

C 1.077360 -1.456030 1.189280

C 0.584020 -0.859570 -0.141260

F 0.261950 -1.004810 2.243150

N -0.363510 0.096270 -0.031490

O 1.052970 -1.259360 -1.197180

C -0.993820 0.709320 -1.206420

C -0.135110 1.888620 -1.676170

C -2.431980 1.088010 -0.908220

F -0.679320 2.406180 -2.857090

C -3.475330 0.459500 -1.591740

C -4.802540 0.789690 -1.323340

C -5.102020 1.751280 -0.360900

C -4.068090 2.383650 0.328360

C -2.742380 2.056190 0.054210

H 4.436560 0.910240 3.416500

H 6.239420 -0.211570 2.131300

H 5.654920 -1.914440 0.421550

H 3.286830 -2.484010 -0.002520

H 2.068430 0.332530 2.994220

H 0.940270 -2.537690 1.123500

H -0.731360 0.296720 0.887000

H -0.976130 -0.038100 -2.002320

H 0.878470 1.547700 -1.893050

H -0.109400 2.690860 -0.935250

H -3.246550 -0.290390 -2.341090

H -5.600580 0.295210 -1.865400

H -6.133650 2.009040 -0.150330

H -4.292970 3.135530 1.076210

H -1.950790 2.566670 0.593350

**Ball-cylinder model for (*S*)-FPP-(*S*)-amine 23 and cartesian coordinates (Gaussian 09).**


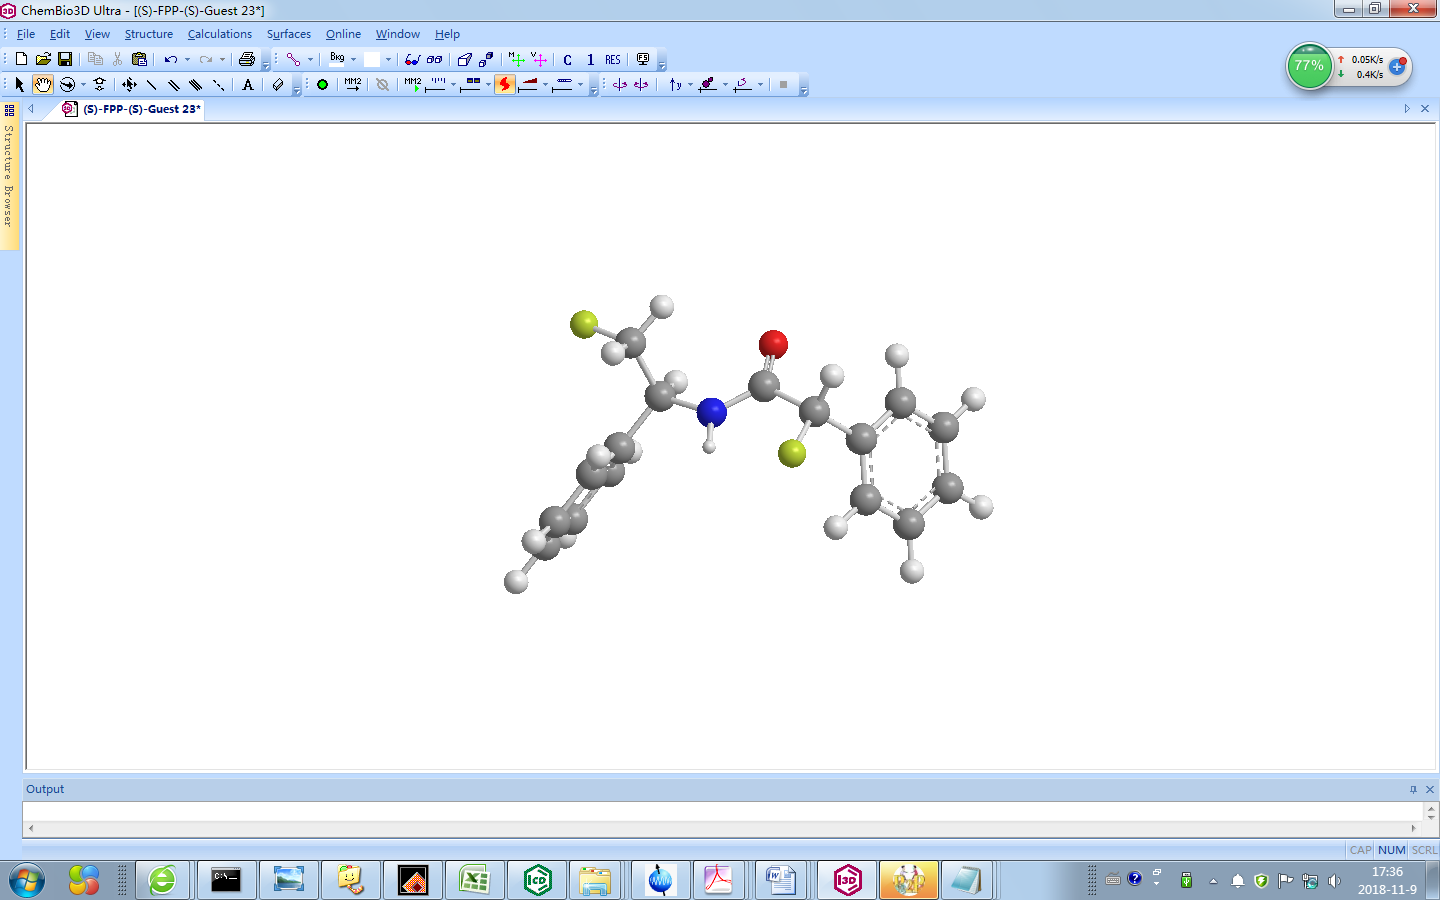
 δα-F*S* (calcd.) = -193.63 ppm

C 4.374972 -2.128655 0.993806

C 3.808632 -2.782115 2.088076

C 2.717522 -2.214555 2.742236

C 2.189542 -1.000695 2.305056

C 2.757412 -0.345205 1.211226

C 3.854882 -0.913125 0.557756

C 2.184242 0.963425 0.714016

C 1.357512 0.777035 -0.571624

F 1.385292 1.552875 1.710976

N 0.038692 1.040635 -0.455424

O 1.908002 0.411345 -1.600234

C -0.902688 0.835065 -1.562204

C -0.867788 2.055685 -2.488654

C -2.288108 0.518475 -1.031374

F -1.687438 1.809415 -3.596084

C -2.863818 -0.728995 -1.282854

C -4.132508 -1.038285 -0.795764

C -4.839218 -0.102235 -0.044044

C -4.272808 1.145265 0.214586

C -3.007458 1.454385 -0.278434

H 5.226082 -2.562665 0.481596

H 4.218102 -3.725795 2.429976

H 2.273942 -2.715105 3.595466

H 1.346082 -0.557305 2.818346

H 4.292332 -0.408925 -0.295324

H 2.979642 1.675995 0.484316

H -0.313268 1.325215 0.446756

H -0.535808 -0.015935 -2.139854

H 0.148242 2.218025 -2.851404

H -1.235778 2.954345 -1.988524

H -2.316308 -1.461215 -1.866274

H -4.566428 -2.009915 -1.002684

H -5.825698 -0.341235 0.336446

H -4.817868 1.879985 0.796196

H -2.588128 2.434795 -0.076074

# 3. 19F NMR calculation for all conformers according to Boltzmann equations based on free energies data by frequency calculation.

| Molecules | Δδα-F*R,S*Calcd (ppm)  (most stable conformer) [a] | Δδα-F*R,S*Calcd (ppm)  (boltzmann equations statistic) [a] |
| --- | --- | --- |
|  | - 0.6626 | -0. 6756 |
|  | -0.4975 | -0.5286 |

[a] Δδα-F*R,S* = δα-F (*R*)-FPA-amide - δα-F (*S*)-FPA-amide.
